# Supplementary material for: Transition-metal-free regioselective hydroamination of styrenes with amino-heteroarenes
Source: Royal Society of Chemistry journal article supplement (doi:10.1039/d2cc02781j), 2022-01-01

## *Supporting Information*

### **Transition-Metal-Free Regioselective Hydroamination of Styrenes with Amino-Heteroarenes**

Priyanka Meena,<sup>a</sup> Ayushee,<sup>a</sup> Monika Patel,<sup>a,b</sup> and Akhilesh K. Verma<sup>a,c\*</sup>

<sup>a</sup>Department of Chemistry, University of Delhi, Delhi-110007, India

<sup>b</sup>Department of Chemistry, Ramjas College, University of Delhi, Delhi-110007, India

<sup>c</sup>Institution of Eminence (IoE), University of Delhi, Delhi 110007

| S.No. | Contents                                                                                                         | Page No. |
|-------|------------------------------------------------------------------------------------------------------------------|----------|
| 1     | General Experimental procedure and reagents                                                                      | S2-S3    |
| 2     | Optimization Table                                                                                               | S4-S5    |
| 3     | General Procedure for the Synthesis of <i>N</i> -Phenethylpyridinamine                                           | S5-S22   |
| 4     | General Procedure for the Synthesis of Double-hydroaminated Product ( <b>12'</b> , <b>14'</b> and <b>15a-c</b> ) | S19-S22  |
| 5     | Copies of <sup>1</sup> H, <sup>13</sup> C NMR and HRMS                                                           | S23-S156 |

## General Experimental

**General Method.**  $^1\text{H}$  NMR (400 MHz) and  $^{13}\text{C}$  NMR (100 MHz) spectra were recorded in  $\text{CDCl}_3/\text{DMSO}-d_6$ . Chemical shifts for protons and carbons are reported in ppm from tetramethylsilane and are referenced to the carbon resonance of the solvent. Data are reported as follows: chemical shift, multiplicity (s = singlet, br s = broad singlet, d = doublet, t = triplet, q = quartet, m = multiplet, dd = doublet of doublet), coupling constants in Hertz and integration. High-resolution mass spectra were recorded on electrospray mass spectrometer. TLC analysis was performed on commercially prepared 60 F<sub>254</sub> silica gel plates and visualized by either UV irradiation or by staining with  $\text{I}_2$ . All purchased chemicals were used as received. All melting points are uncorrected.

## Scope of Aminopyridine

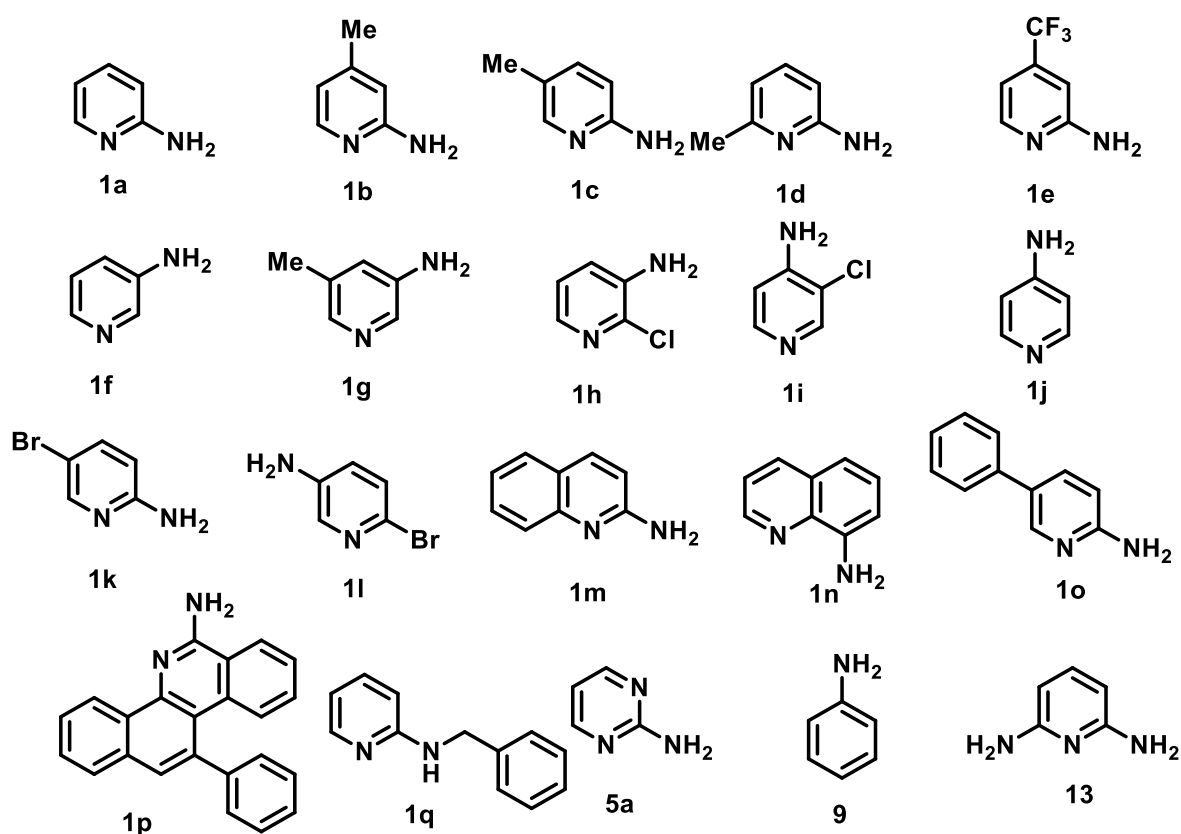

## Scope of Styrene

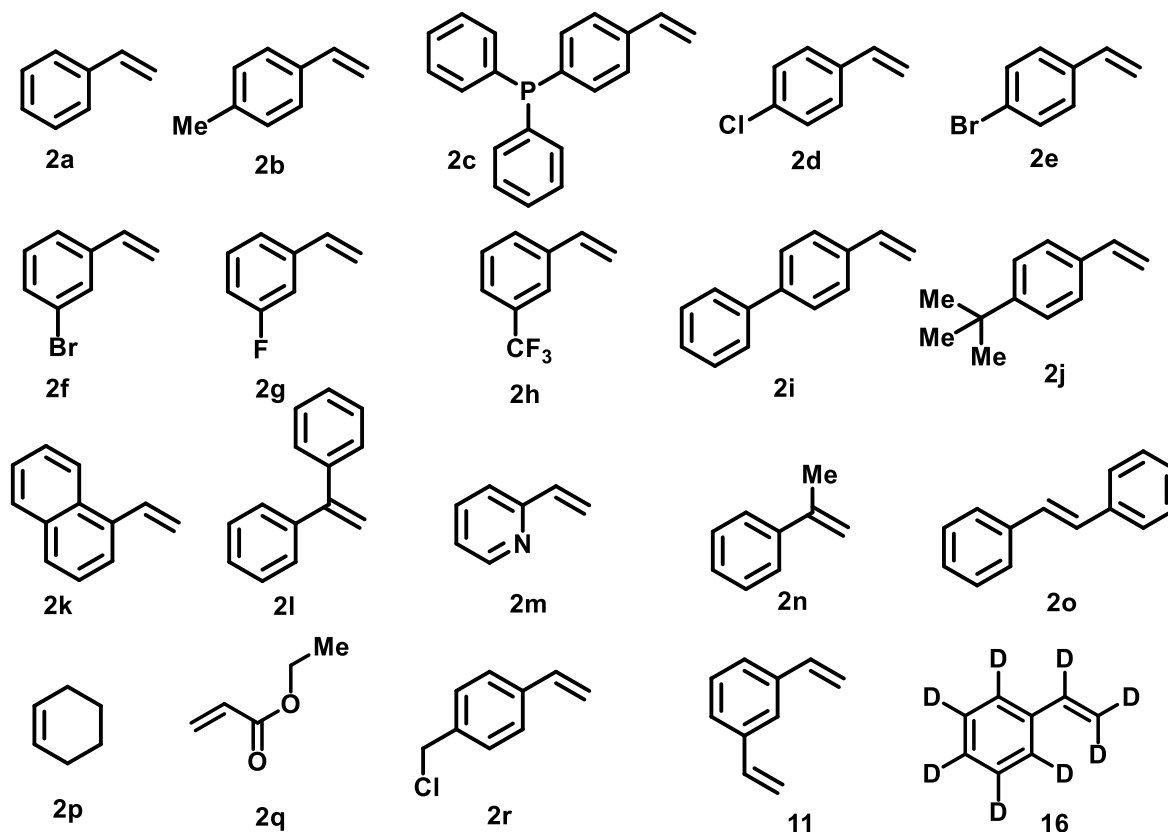

## General Procedure for the Synthesis of *N*-Heterocyclic amines

*N*-Heterocyclic amines (**1a-n**, **1q**, **5a,b**, **9** and **13**) and Alkene (**2a-r**, **11**, and **16**) were commercially available from Sigma Aldrich Chemical Co and TCI Chemicals. And **1o**<sup>1</sup> and **1p**<sup>2</sup> aminopyridine were synthesized.

1. S. T. Handy and D. Mayi, *Tetrahedron Lett.*, 2007, **48**, 8108–8110.
2. B. Clement, M. Weide, U. Wolschendorf and I. Kock, *Angew. Chem. Int. Ed.*, 2005, **44**, 635–638.

**Table 1.** Reaction development<sup>a</sup>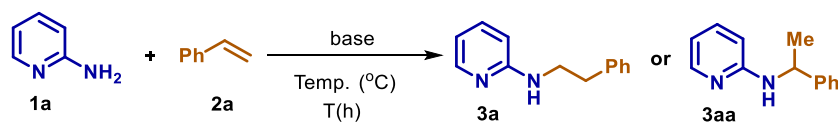

| Entry    | Base(equiv)                          | Solvent     | Time<br>(h) | Temp (°C) | Yield (%) <sup>b</sup><br><b>3a</b> |
|----------|--------------------------------------|-------------|-------------|-----------|-------------------------------------|
| 1        | KOH(1.0)                             | DMSO        | 3           | 120       | 60                                  |
| 2        | KOH(1.0)                             | DMSO        | 3           | 100       | 72                                  |
| <b>3</b> | <b>KOH(1.0)</b>                      | <b>DMSO</b> | <b>3</b>    | <b>80</b> | <b>85</b>                           |
| 4        | KOH(1.0)                             | DMSO        | 3           | 60        | 73                                  |
| 5        | KOH(0.5)                             | DMSO        | 3           | 80        | 50                                  |
| 6        | KOH(0.2)                             | DMSO        | 3           | 80        | Trace                               |
| 7        | KOH(1.5)                             | DMSO        | 3           | 80        | 57                                  |
| 8        | KOH(1.0)                             | DMSO        | 1.5         | 80        | 70                                  |
| 9        | KOH(1.0)                             | DMSO        | 1           | 80        | 60                                  |
| 10       | KOH(1.0)                             | DCE         | 3           | 80        | 45                                  |
| 11       | KOH(1.0)                             | NMP         | 3           | 80        | n.r.                                |
| 12       | KOH(1.0)                             | DMPU        | 3           | 80        | n.r.                                |
| 13       | KOH(1.0)                             | DMF         | 3           | 80        | n.r.                                |
| 14       | KOH(1.0)                             | Toluene     | 3           | 80        | n.r.                                |
| 15       | KO <sup>t</sup> Bu(1.0)              | DMSO        | 3           | 80        | 25                                  |
| 16       | K <sub>2</sub> CO <sub>3</sub> (1.0) | DMSO        | 3           | 80        | n.r.                                |
| 17       | K <sub>3</sub> PO <sub>4</sub> (1.0) | DMSO        | 3           | 80        | n.r.                                |



|    |                                       |      |   |    |      |
|----|---------------------------------------|------|---|----|------|
| 18 | Cs <sub>2</sub> CO <sub>3</sub> (1.0) | DMSO | 3 | 80 | n.r. |
| 19 | KOAc(1.0)                             | DMSO | 3 | 80 | n.r. |
| 20 | Et <sub>3</sub> N(1.0)                | DMSO | 3 | 80 | n.r. |

<sup>a</sup>Reactions were performed using 0.5 mmol of **1a**, 0.8 mmol of **2a** and base in 2.0 mL of solvent.

<sup>b</sup>Isolated yield. n.r. = no reaction. DMSO = Dimethylsulfoxide, DMF = Dimethylformamide, DMPU = *N,N'*-Dimethylpropylene urea, DCE = Dichloroethane, NMP = *N*-Methylpyrrolidone.

***N*-Heterocyclic amines (3–8).** In an oven-dried 15 mL reaction vial, a solution of aminopyridine **1** (0.5 mmol), alkene **2** (0.8 mmol) and KOH (1.0equiv) in 2 mL of DMSO was heated in an oil bath at 80 °C for 3 h. Progression of the reaction was monitored by TLC analysis; after complete consumption of starting material, the reaction was cooled to room temperature. The reaction mixture was diluted with ethyl acetate (10 mL X 3) and water (10 mL X 3). The layers were separated, and the organic layer was washed with aqueous saturated brine solution and dried over Na<sub>2</sub>SO<sub>4</sub>. Organic layer was concentrated under reduced pressure. The crude material so obtained was purified by column chromatography on neutral/basic alumina. The structure and purity of products were confirmed by comparison of their physical and spectral data (<sup>1</sup>H NMR, <sup>13</sup>C NMR, and HRMS).

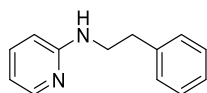

***N*-Phenethylpyridin-2-amine (3a).** The crude product was purified by column chromatography (hexane/EtOAc = 95/5) to afford **3a** as a yellow oil, (84.1 mg, 85%): <sup>1</sup>H NMR (400 MHz, (CD<sub>3</sub>)<sub>2</sub>SO) δ 8.03 (d, *J* = 4.5 Hz, 1H), 7.37–7.33 (m, 1H), 7.31–7.24 (m, 4H), 7.21–7.17 (m, 1H), 6.57 (t, *J* = 5.5 Hz, 1H), 6.51–6.45 (m, 2H), 3.50 (q, *J* = 7.2 Hz, 2H), 2.86 (t, *J* = 8.0 Hz, 2H); <sup>13</sup>C{<sup>1</sup>H} NMR (100MHz, (CD<sub>3</sub>)<sub>2</sub>SO) δ 159.3, 148.2, 140.6, 137.0, 129.2, 128.8, 126.4, 112.0, 108.6, 43.1, 35.8; IR spectrum in film (ν<sub>max</sub>, cm<sup>-1</sup>) 3338, 1690, 1465, 1341; HRMS (ESI) *m/z* Calcd for [C<sub>13</sub>H<sub>14</sub>N<sub>2</sub>] requires [M]<sup>+</sup>198.1157, found 198.1169.

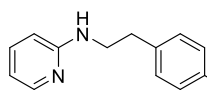

***N*-(4-Methylphenethyl)pyridin-2-amine (3b).** The crude product was purified by column chromatography (hexane/EtOAc = 95/5) to afford **3b** as a brown oil, (84.8 mg, 80%): <sup>1</sup>H NMR (400 MHz, (CD<sub>3</sub>)<sub>2</sub>SO) δ 8.02 (dd, *J*<sub>1</sub> = 5.0, *J*<sub>2</sub> = 1.2 Hz, 1H), 7.37–7.32 (m, 1H), 7.13 (d, *J* = 8.0 Hz, 2H), 7.08 (d, *J* = 8.0 Hz, 2H), 6.54 (t, *J* = 5.6 Hz, 1H), 6.50–6.45 (m, 2H), 3.47 (dd, *J*<sub>1</sub> = 14.4, *J*<sub>2</sub> = 6.2 Hz, 2H), 2.81 (t, *J* = 8.0 Hz, 2H), 2.26 (s, 3H); <sup>13</sup>C{<sup>1</sup>H} NMR

(100 MHz, (CD<sub>3</sub>)<sub>2</sub>SO)  $\delta$  159.3, 148.2, 137.4, 137.0, 135.3, 129.4, 129.1, 112.0, 108.6, 43.2, 35.4, 21.2; IR spectrum in film ( $\nu_{\text{max}}$ , cm<sup>-1</sup>) 3340, 1652, 1463, 1450, 1332; HRMS (ESI)  $m/z$  Calcd for [C<sub>14</sub>H<sub>16</sub>N<sub>2</sub>] requires [M]<sup>+</sup> 212.1313, found 212.1331.

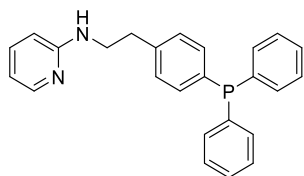

***N*-(4-Diphenylphosphanyl)phenethyl)pyridin-2-amine (3c).** The crude product was purified by column chromatography (hexane/EtOAc = 90/10) to afford **3c** as a pale yellow oil, (143.30 mg, 75%): <sup>1</sup>H NMR (400 MHz, (CD<sub>3</sub>)<sub>2</sub>SO)  $\delta$  7.96–7.94 (m, 1H), 7.64–7.51 (m, 1H), 7.39–7.16 (m, 14H), 6.56 (t,  $J$  = 5.4 Hz, 1H), 6.46–6.45 (m, 2H), 3.47 (q,  $J$  = 7.2 Hz, 2H), 2.91–2.81 (m, 2H); <sup>13</sup>C{<sup>1</sup>H}NMR (100 MHz, (CD<sub>3</sub>)<sub>2</sub>SO)  $\delta$  159.0, 147.8, 141.6, 137.4 (d, C-P, <sup>3</sup> $J_{\text{C-P}}$  = 11.13 Hz), 137.0, 134.1 (d, C-P, <sup>3</sup> $J_{\text{C-P}}$  = 10.39 Hz), 133.9, 133.7, 133.6 (d, C-P, <sup>3</sup> $J_{\text{C-P}}$  = 19.36 Hz), 132.4, 131.9, 131.8, 129.7 (d, C-P, <sup>3</sup> $J_{\text{C-P}}$  = 7.12 Hz), 129.3, 129.2 (d, C-P, <sup>3</sup> $J_{\text{C-P}}$  = 6.84 Hz), 129.1, 111.9, 108.6, 42.6, 35.4; <sup>31</sup>P NMR (162 MHz, (CD<sub>3</sub>)<sub>2</sub>SO)  $\delta$  -7.32–7.55; IR spectrum in film ( $\nu_{\text{max}}$ , cm<sup>-1</sup>) 3342, 1649, 1464, 1346, 1332; HRMS (ESI)  $m/z$  Calcd for [C<sub>25</sub>H<sub>24</sub>N<sub>2</sub>P] requires [M+H]<sup>+</sup> 383.1677, found 383.1695.

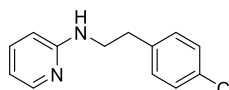

***N*-(4-Chlorophenethyl)pyridin-2-amine (3d).** The crude product was purified by column chromatography (hexane/EtOAc = 90/10) to afford **3d** as a brown oil, (102.1 mg, 88%): <sup>1</sup>H NMR (400 MHz, (CD<sub>3</sub>)<sub>2</sub>SO)  $\delta$  8.02 (d,  $J$  = 3.2 Hz, 1H), 7.34–7.21 (m, 5H), 6.50–6.44 (m, 3H), 3.50–3.47 (m, 2H), 2.85–2.82 (m, 2H); <sup>13</sup>C{<sup>1</sup>H}NMR (100 MHz, (CD<sub>3</sub>)<sub>2</sub>SO)  $\delta$  159.3, 148.2, 139.6, 137.0, 131.3, 131.0, 128.7, 112.1, 108.7, 42.9, 35.2; IR spectrum in film ( $\nu_{\text{max}}$ , cm<sup>-1</sup>) 3332, 1690, 1460, 1270, 1332, 850; HRMS (ESI)  $m/z$  Calcd for [C<sub>13</sub>H<sub>14</sub>ClN<sub>2</sub>] requires [M+H]<sup>+</sup> 233.0846, found 233.0816.

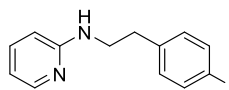

***N*-(4-Bromophenethyl)pyridin-2-amine (3e).** The crude product was purified by column chromatography (hexane/EtOAc = 90/10) to afford **3e** as a brown oil, (124.2 mg, 90%): <sup>1</sup>H NMR (400 MHz, (CD<sub>3</sub>)<sub>2</sub>SO)  $\delta$  8.00 (d,  $J$  = 4.0 Hz, 1H), 7.47 (d,  $J$  = 8.3 Hz, 2H), 7.37–7.33 (m, 1H), 7.21 (d,  $J$  = 8.3 Hz, 2H), 6.52 (t,  $J$  = 5.5 Hz, 1H), 6.49–6.45 (m, 2H), 3.47 (dd,  $J_1$  = 13.3,  $J_2$  = 7.0 Hz, 2H), 2.82 (t,  $J$  = 7.3 Hz, 2H); <sup>13</sup>C{<sup>1</sup>H}NMR (100 MHz, (CD<sub>3</sub>)<sub>2</sub>SO)  $\delta$  159.2, 148.1, 140.0, 137.0, 131.5, 131.4, 119.5, 111.9, 108.6, 42.6,

35.0; IR spectrum in film ( $\nu_{\max}$ ,  $\text{cm}^{-1}$ ) 3347, 1676, 1465, 1342, 690; HRMS (ESI)  $m/z$  Calcd for  $[\text{C}_{13}\text{H}_{14}\text{BrN}_2]$  requires  $[\text{M}+\text{H}]^+$  277.0340, found 277.0351.

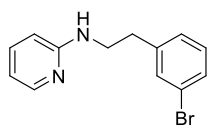

***N*-(3-Bromophenethyl)pyridin-2-amine (3f).** The crude product was purified by column chromatography (hexane/EtOAc = 90/10) to afford **3f** as a brown oil, (125.5 mg, 91%):  $^1\text{H}$  NMR (400 MHz,  $(\text{CD}_3)_2\text{SO}$ )  $\delta$  7.97–7.96 (m, 1H), 7.43 (s, 1H), 7.36–7.30 (m, 2H), 7.22–7.18 (m, 2H), 6.50–6.43 (m, 3H), 3.45 (dd,  $J_1 = 12.9$ ,  $J_2 = 7.0$  Hz, 2H), 2.82 (t,  $J = 7.1$  Hz, 2H);  $^{13}\text{C}\{^1\text{H}\}$  NMR (100 MHz,  $(\text{CD}_3)_2\text{SO}$ )  $\delta$  159.2, 148.1, 143.5, 137.1, 132.0, 131.0, 129.4, 128.4, 122.2, 112.1, 108.7, 42.7, 35.2; IR spectrum in film ( $\nu_{\max}$ ,  $\text{cm}^{-1}$ ) 3341, 1680, 1463, 1340, 650; HRMS (ESI)  $m/z$  Calcd for  $[\text{C}_{13}\text{H}_{14}\text{BrN}_2]$  requires  $[\text{M}+\text{H}]^+$  277.0340, found 277.0352.

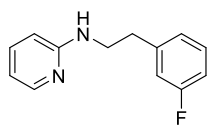

***N*-(3-Fluorophenethyl)pyridin-2-amine (3g).** The crude product was purified by column chromatography (hexane/EtOAc = 90/10) to afford **3g** as a brown oil, (101.5 mg, 94%):  $^1\text{H}$  NMR (400 MHz,  $(\text{CD}_3)_2\text{SO}$ )  $\delta$  8.06 (d,  $J = 3.7$  Hz, 1H), 7.33 (ddd,  $J_1 = 22.2$ ,  $J_2 = 11.5$ ,  $J_3 = 4.9$  Hz, 2H), 7.08 (d,  $J = 7.1$  Hz, 2H), 7.00 (dd,  $J_1 = 12.0$ ,  $J_2 = 5.2$  Hz, 1H), 6.56 (dd,  $J_1 = 12.6$ ,  $J_2 = 6.8$  Hz, 2H), 6.51 – 6.46 (m, 1H), 3.56 (dd,  $J_1 = 13.1$ ,  $J_2 = 6.8$  Hz, 2H), 2.91 (t,  $J = 7.2$  Hz, 2H);  $^{13}\text{C}\{^1\text{H}\}$  NMR (100 MHz,  $(\text{CD}_3)_2\text{SO}$ )  $\delta$  163.9, 161.5, 159.2, 148.1, 143.5 (C-F,  $^3J_{\text{C-F}} = 7.3$  Hz), 136.9, 130.3 (C-F,  $^3J_{\text{C-F}} = 8.1$  Hz), 125.2 (C-F,  $^4J_{\text{C-F}} = 2.5$  Hz), 115.8 (C-F,  $^3J_{\text{C-F}} = 20.4$  Hz), 113.0 (C-F,  $^3J_{\text{C-F}} = 20.7$  Hz), 111.9, 108.5, 42.6, 35.3;  $^{19}\text{F}$  NMR (376 MHz,  $(\text{CD}_3)_2\text{SO}$ )  $\delta$  -113.503 – -113.659; IR spectrum in film ( $\nu_{\max}$ ,  $\text{cm}^{-1}$ ) 3334, 1673, 1462, 1400, 1341; HRMS (ESI)  $m/z$  Calcd for  $[\text{C}_{13}\text{H}_{14}\text{FN}_2]$  requires  $[\text{M}+\text{H}]^+$  217.1141, found 217.1145.

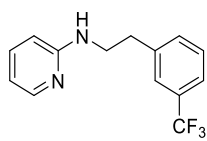

***N*-(3-(Trifluoromethyl)phenethyl)pyridin-2-amine (3h).** The crude product was purified by column chromatography (hexane/EtOAc = 90/10) to afford **3h** as a brown oil, (127.7 mg, 96%):  $^1\text{H}$  NMR (400 MHz,  $(\text{CD}_3)_2\text{SO}$ )  $\delta$  8.02 (d,  $J = 4.5$  Hz, 1H), 7.62 (s, 1H), 7.58–7.50 (m, 3H), 7.38–7.35 (m, 1H), 6.63 (t,  $J = 5.2$  Hz, 1H), 6.52–6.47 (m, 2H), 3.55 (dd,  $J_1 = 12.9$ ,  $J_2 = 6.7$  Hz, 2H), 2.98 (t,  $J = 7.1$  Hz, 2H);  $^{13}\text{C}\{^1\text{H}\}$  NMR (100 MHz,  $(\text{CD}_3)_2\text{SO}$ )  $\delta$  159.2, 148.0, 142.1, 137.0, 133.4, 129.8, 129.6, 129.5, 125.7 (C-F,  $^3J_{\text{C-F}} = 3.8$  Hz), 124.4 (C-F,  $^1J_{\text{C-F}} = 254.9$  Hz), 123.2 (C-F,  $^4J_{\text{C-F}} = 2.9$  Hz), 112.0, 108.7, 42.6, 35.3;  $^{19}\text{F}$  NMR (376 MHz,

(CD<sub>3</sub>)<sub>2</sub>SO)  $\delta$  -61.061; IR spectrum in film ( $\nu_{\max}$ , cm<sup>-1</sup>) 3345, 1683, 1460, 1380, 1266; HRMS (ESI)  $m/z$  Calcd for [C<sub>14</sub>H<sub>14</sub>F<sub>3</sub>N<sub>2</sub>] requires [M+H]<sup>+</sup> 267.1109, found 267.1119.

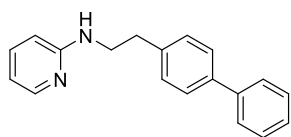

**N-(2-([1,1'-Biphenyl]-4-yl)ethyl)pyridin-2-amine (3i).** The crude product was purified by column chromatography (hexane/EtOAc = 90/10) to afford **3i** as a brown oil, (120.6 mg, 88%): <sup>1</sup>H NMR (400 MHz, (CD<sub>3</sub>)<sub>2</sub>SO)  $\delta$  8.05–8.04 (m, 1H), 7.63 (d,  $J$  = 7.2 Hz, 2H), 7.58 (d,  $J$  = 8.1 Hz, 2H), 7.46–7.42 (m, 2H), 7.38–7.28 (m, 4H), 6.99–6.56 (m, 1H), 6.53–6.47 (m, 2H), 3.54 (q,  $J$  = 6.64 Hz, 2H), 2.91 (t,  $J$  = 7.4 Hz, 2H); <sup>13</sup>C{<sup>1</sup>H}NMR (100 MHz, (CD<sub>3</sub>)<sub>2</sub>SO)  $\delta$  159.3, 148.2, 140.6, 139.9, 138.4, 137.0, 129.8, 129.4, 127.6, 127.1, 127.0, 112.0, 108.6, 42.9, 35.3; IR spectrum in film ( $\nu_{\max}$ , cm<sup>-1</sup>) 3336, 1689, 1462, 1342; HRMS (ESI)  $m/z$  Calcd for [C<sub>19</sub>H<sub>19</sub>N<sub>2</sub>] requires [M+H]<sup>+</sup> 275.1548, found 275.1559.

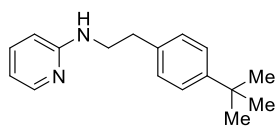

**N-(4-(tert-Butyl)phenethyl)pyridin-2-amine (3j).** The crude product was purified by column chromatography (hexane/EtOAc = 90/10) to afford **3j** as a brown oil, (105.4 mg, 83%): <sup>1</sup>H NMR (400 MHz, (CD<sub>3</sub>)<sub>2</sub>SO)  $\delta$  8.02 (d,  $J$  = 3.8 Hz, 1H), 7.33–7.28 (m, 3H), 7.17 (d,  $J$  = 8.1 Hz, 2H), 6.53–6.49 (m, 2H), 6.47–6.44 (m, 1H), 3.49 (q,  $J$  = 6.8 Hz, 2H), 2.84 (t,  $J$  = 7.5 Hz, 2H), 1.26 (s, 9H); <sup>13</sup>C{<sup>1</sup>H}NMR (100 MHz, (CD<sub>3</sub>)<sub>2</sub>SO)  $\delta$  159.3, 148.69, 148.1, 137.4, 136.8, 128.8, 125.4, 111.9, 108.5, 43.1, 35.2, 34.5, 31.7; IR spectrum in film ( $\nu_{\max}$ , cm<sup>-1</sup>) 3350, 1690, 1460, 1450, 1340; HRMS (ESI)  $m/z$  Calcd for [C<sub>17</sub>H<sub>23</sub>N<sub>2</sub>] requires [M+H]<sup>+</sup> 255.1861, found 255.1868.

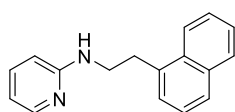

**N-(2-(Naphthalen-1-yl)ethyl)pyridin-2-amine (3k).** The crude product was purified by column chromatography (hexane/EtOAc = 90/10) to afford **3k** as a brown oil, (105.4 mg, 85%): <sup>1</sup>H NMR (400 MHz, (CD<sub>3</sub>)<sub>2</sub>SO)  $\delta$  8.31 (d,  $J$  = 8.3 Hz, 1H), 8.06 (d,  $J$  = 3.9 Hz, 1H), 7.92 (d,  $J$  = 7.9 Hz, 1H), 7.79 (d,  $J$  = 7.7 Hz, 1H), 7.55 (dt,  $J_1$  = 14.6,  $J_2$  = 6.9 Hz, 2H), 7.47–7.34 (m, 3H), 6.68 (t,  $J$  = 5.4 Hz, 1H), 6.53–6.44 (m, 2H), 3.58 (dd,  $J_1$  = 13.8,  $J_2$  = 6.9 Hz, 2H), 3.35–3.29 (m, 2H); <sup>13</sup>C{<sup>1</sup>H}NMR (100 MHz, (CD<sub>3</sub>)<sub>2</sub>SO)  $\delta$  159.2, 148.1, 137.1, 136.6, 134.0, 132.2, 129.0, 127.1, 127.0, 126.5, 126.0 (d,  $J$  = 2.9 Hz), 124.5, 111.9, 108.8, 42.4, 33.1; IR spectrum in film ( $\nu_{\max}$ , cm<sup>-1</sup>) 3343, 1676, 1463, 1333; HRMS (ESI)  $m/z$  Calcd for [C<sub>17</sub>H<sub>17</sub>N<sub>2</sub>] requires [M+H]<sup>+</sup> 249.1392, found 249.1402.

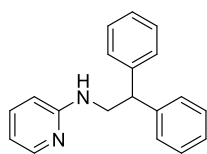

**N-(2,2-Diphenylethyl)pyridin-2-amine (3l).** The crude product was product was purified by column chromatography (hexane/EtOAc = 90/10) to afford **3l** as a brown oil, (123.3 mg, 90%):  $^1\text{H}$  NMR (400 MHz,  $(\text{CD}_3)_2\text{SO}$ )  $\delta$  8.00–7.99 (m, 1H), 7.33–7.26 (m, 9H), 7.19–7.15 (m, 2H), 6.46–6.44 (m, 3H), 4.39–4.35 (m, 1H), 3.90 (t,  $J = 7.1$  Hz, 2H);  $^{13}\text{C}\{^1\text{H}\}$  NMR (100 MHz,  $(\text{CD}_3)_2\text{SO}$ )  $\delta$  159.1, 148.0, 143.9, 136.9, 128.9, 128.5, 126.7, 112.0, 108.9, 50.4, 45.9; IR spectrum in film ( $\nu_{\text{max}}$ ,  $\text{cm}^{-1}$ ) 3350, 1670, 1460, 1339; HRMS (ESI)  $m/z$  Calcd for  $[\text{C}_{19}\text{H}_{19}\text{N}_2]$  requires  $[\text{M}+\text{H}]^+$  275.1548, found 275.1559.

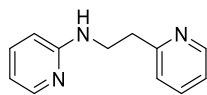

**N-(2-(Pyridin-2-yl)ethyl)pyridin-2-amine (3m).** The crude product was product was purified by column chromatography (hexane/EtOAc = 90/10) to afford **3m** as a brown oil, (74.6 mg, 75%):  $^1\text{H}$  NMR (400 MHz,  $(\text{CD}_3)_2\text{SO}$ )  $\delta$  8.54 (d,  $J = 4.8$  Hz, 1H), 8.04 (d,  $J = 4.9$  Hz, 1H), 7.68 (td,  $J_1 = 7.6$ ,  $J_2 = 1.8$  Hz, 1H), 7.39–7.35 (m, 1H), 7.28 (d,  $J = 7.7$  Hz, 1H), 7.21 (dd,  $J_1 = 6.9$ ,  $J_2 = 5.3$  Hz, 1H), 6.64 (t,  $J = 5.0$  Hz, 1H), 6.53–6.47 (m, 2H), 3.67 (dd,  $J_1 = 12.8$ ,  $J_2 = 6.9$  Hz, 2H), 3.05 (t,  $J = 7.2$  Hz, 2H);  $^{13}\text{C}\{^1\text{H}\}$  NMR (100 MHz,  $(\text{CD}_3)_2\text{SO}$ )  $\delta$  160.2, 159.3, 149.5, 148.1, 137.1, 136.8, 123.7, 121.8, 112.0, 108.6, 41.3, 38.0; IR spectrum in film ( $\nu_{\text{max}}$ ,  $\text{cm}^{-1}$ ) 3320, 1689, 1462, 1340; HRMS (ESI)  $m/z$  Calcd for  $[\text{C}_{12}\text{H}_{14}\text{N}_3]$  requires  $[\text{M}+\text{H}]^+$  200.1188, found 200.1194.

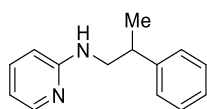

**N-(2-Phenylpropyl)pyridin-2-amine (3n).** The crude product was product was purified by column chromatography (hexane/EtOAc = 90/10) to afford **3n** as a brown oil, (86.9 mg, 82%):  $^1\text{H}$  NMR (400 MHz,  $(\text{CD}_3)_2\text{SO}$ )  $\delta$  7.99 (d,  $J = 3.6$  Hz, 1H), 7.34–7.25 (m, 5H), 7.21–7.17 (m, 1H), 6.49–6.43 (m, 3H), 3.49–3.34 (m, 2H), 3.07 (td,  $J_1 = 14.0$ ,  $J_2 = 7.0$  Hz, 1H), 1.25 (d,  $J = 6.9$  Hz, 3H);  $^{13}\text{C}\{^1\text{H}\}$  NMR (100 MHz,  $(\text{CD}_3)_2\text{SO}$ )  $\delta$  159.4, 148.1, 146.0, 137.0, 128.8, 127.7, 111.9, 108.7, 48.5, 39.3, 20.0; IR spectrum in film ( $\nu_{\text{max}}$ ,  $\text{cm}^{-1}$ ) 3338, 1691, 1465, 1450, 1341; HRMS (ESI)  $m/z$  Calcd for  $[\text{C}_{14}\text{H}_{17}\text{N}_2]$  requires  $[\text{M}+\text{H}]^+$  213.1392, found 213.1396.

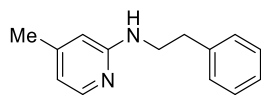

**4-Methyl-N-phenethylpyridin-2-amine (4a).** The crude product was product was purified by column chromatography (hexane/EtOAc = 90/10) to afford **4a** as a

brown oil, (90.1 mg, 85%):  $^1\text{H}$  NMR (400 MHz,  $(\text{CD}_3)_2\text{SO}$ )  $\delta$  6.88 (d,  $J = 5.4$  Hz, 1H), 6.38–6.25 (m, 5H), 5.49 (d,  $J = 5.2$  Hz, 1H), 5.42 (s, 1H), 4.04 (s, 1H), 2.58 (t,  $J = 7.3$  Hz, 2H), 1.97 (t,  $J = 7.3$  Hz, 2H), 1.28 (s, 3H);  $^{13}\text{C}\{^1\text{H}\}$  NMR (100 MHz,  $(\text{CD}_3)_2\text{SO}$ )  $\delta$  151.8, 141.8, 139.0, 132.6, 121.5, 121.0, 118.8, 106.5, 101.2, 35.9, 28.3, 12.8; IR spectrum in film ( $\nu_{\text{max}}$ ,  $\text{cm}^{-1}$ ) 3349, 1687, 1462, 1449, 1340; HRMS (ESI)  $m/z$  Calcd for  $[\text{C}_{14}\text{H}_{17}\text{N}_2]$  requires  $[\text{M}+\text{H}]^+$  213.1392, found 213.1398.

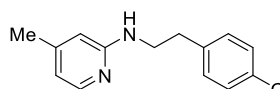

**N-(4-Chlorophenethyl)-4-methylpyridin-2-amine (4b).** The crude product was purified by column chromatography (hexane/EtOAc = 90/10) to afford **4b** as a brown oil, (107.0 mg, 87%):  $^1\text{H}$  NMR (400 MHz,  $(\text{CD}_3)_2\text{SO}$ )  $\delta$  7.85 (d,  $J = 5.1$  Hz, 1H), 7.33 (d,  $J = 8.3$  Hz, 2H), 7.25 (d,  $J = 8.3$  Hz, 2H), 6.43–6.40 (m, 1H), 6.32 (d,  $J = 4.6$  Hz, 1H), 6.28 (s, 1H), 3.45 (q,  $J = 6.68$  Hz, 2H), 2.82 (t,  $J = 7.2$  Hz, 2H), 2.14 (s, 3H);  $^{13}\text{C}\{^1\text{H}\}$  NMR (100 MHz,  $(\text{CD}_3)_2\text{SO}$ )  $\delta$  159.4, 147.8, 147.2, 139.6, 131.0, 128.6, 113.6, 108.5, 42.7, 35.0, 21.0; IR spectrum in film ( $\nu_{\text{max}}$ ,  $\text{cm}^{-1}$ ) 3350, 1680, 1461, 1450, 1256, 750; HRMS (ESI)  $m/z$  Calcd for  $[\text{C}_{14}\text{H}_{16}\text{ClN}_2]$  requires  $[\text{M}+\text{H}]^+$  247.1002, found 247.1009.

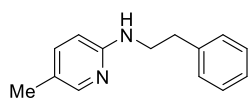

**5-Methyl-N-phenethylpyridin-2-amine (4c).** The crude product was purified by column chromatography (hexane/EtOAc = 90/10) to afford **4c** as a brown oil, (76.3 mg, 72%):  $^1\text{H}$  NMR (400 MHz,  $(\text{CD}_3)_2\text{SO}$ )  $\delta$  7.81 (s, 1H), 7.30–7.13 (m, 6H), 6.39 (d,  $J = 8.4$  Hz, 1H), 6.26 (t,  $J = 5.4$  Hz, 1H), 3.41 (q,  $J = 6.8$  Hz, 2H), 2.80 (t,  $J = 7.2$  Hz, 2H), 2.08 (s, 3H);  $^{13}\text{C}\{^1\text{H}\}$  NMR (100 MHz,  $(\text{CD}_3)_2\text{SO}$ )  $\delta$  157.5, 147.4, 140.6, 138.1, 129.1, 128.7, 126.4, 120.0, 108.2, 43.2, 35.7, 17.5; IR spectrum in film ( $\nu_{\text{max}}$ ,  $\text{cm}^{-1}$ ) 3310, 1690, 1465, 1442, 1320; HRMS (ESI)  $m/z$  Calcd for  $[\text{C}_{14}\text{H}_{17}\text{N}_2]$  requires  $[\text{M}+\text{H}]^+$  213.1392, found 213.1333.

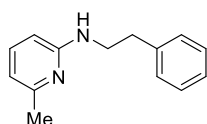

**6-Methyl-N-phenethylpyridin-2-amine (4d).** The crude product was purified by column chromatography (hexane/EtOAc = 90/10) to afford **4d** as a brown oil, (80.6 mg, 76%):  $^1\text{H}$  NMR (400 MHz,  $\text{CDCl}_3$ )  $\delta$  7.35–7.29 (m, 3H), 7.25–7.20 (m, 3H), 6.44 (d,  $J = 7.3$  Hz, 1H), 6.19 (d,  $J = 8.2$  Hz, 1H), 4.58 (s, 1H), 3.50 (dd,  $J_1 = 13.0$ ,  $J_2 = 7.1$  Hz, 2H), 2.91 (t,  $J = 7.1$  Hz, 2H), 2.36 (s, 3H);  $^{13}\text{C}\{^1\text{H}\}$  NMR (100 MHz,  $\text{CDCl}_3$ )  $\delta$  158.4, 157.1, 139.3, 138.0, 128.9, 128.7, 126.5, 112.4, 102.9, 43.8, 35.8, 24.4; IR spectrum in film ( $\nu_{\text{max}}$ ,  $\text{cm}^{-1}$ ) 3322, 1685,

1461, 1450, 1340; HRMS (ESI)  $m/z$  Calcd for  $[C_{14}H_{17}N_2]$  requires  $[M+H]^+$  213.1392, found 213.1401.

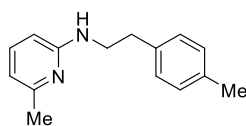

**6-Methyl-N-(4-methylphenethyl)pyridin-2-amine (4e).** The crude product was purified by column chromatography (hexane/EtOAc = 90/10) to afford **4e** as a brown oil, (89.3 mg, 79%):  $^1H$  NMR (400 MHz,  $(CD_3)_2SO$ )  $\delta$  7.83 (d,  $J$  = 5.2 Hz, 1H), 7.17–7.06 (m, 4H), 6.47 (t,  $J$  = 5.6 Hz, 1H), 6.32 (dd,  $J_1$  = 5.3,  $J_2$  = 0.9 Hz, 1H), 6.29 (s, 1H), 3.41 (q,  $J$  = 6.4 Hz, 2H), 2.76 (t,  $J$  = 8.0 Hz, 2H), 2.26 (s, 3H), 2.14 (s, 3H);  $^{13}C\{^1H\}$  NMR (100 MHz,  $(CD_3)_2SO$ )  $\delta$  159.2, 147.6, 147.3, 137.4, 135.3, 129.4, 129.1, 113.6, 108.6, 43.2, 35.3, 21.2; IR spectrum in film ( $\nu_{max}$ ,  $cm^{-1}$ ) 3343, 1633, 1460, 1450, 1259; HRMS (ESI)  $m/z$  Calcd for  $[C_{15}H_{19}N_2]$  requires  $[M+H]^+$  227.1548, found 227.1562.

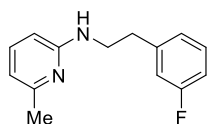

**6-Methyl-N-(4-fluoromethylphenethyl)pyridin-2-amine (4f).** The crude product was purified by column chromatography (hexane/EtOAc = 90/10) to afford **4f** as a brown oil, (100.1 mg, 87%):  $^1H$  NMR (400 MHz,  $(CD_3)_2SO$ )  $\delta$  7.88 (d,  $J$  = 4.9 Hz, 1H), 7.32 (dd,  $J_1$  = 14.3,  $J_2$  = 7.6 Hz, 1H), 7.09 (d,  $J$  = 8.2 Hz, 2H), 7.01 (t,  $J$  = 8.9 Hz, 1H), 6.45 (s, 1H), 6.34 – 6.32 (m, 2H), 3.50 (dd,  $J_1$  = 12.9,  $J_2$  = 6.7 Hz, 2H), 2.87 (t,  $J$  = 7.2 Hz, 2H), 2.14 (s, 3H);  $^{13}C\{^1H\}$  NMR (100 MHz,  $(CD_3)_2SO$ )  $\delta$  163.9, 161.5, 159.4, 147.4 (C-F,  $^2J_{C-F}$  = 50.6 Hz), 143.5 (C-F,  $^3J_{C-F}$  = 7.5 Hz), 130.4 (C-F,  $^3J_{C-F}$  = 8.4 Hz), 125.3, 115.8 (C-F,  $^2J_{C-F}$  = 20.6 Hz), 113.6, 113.0 (C-F,  $^2J_{C-F}$  = 20.7 Hz), 108.4, 42.6, 35.3, 21.0;  $^{19}F$  NMR (376 MHz,  $(CD_3)_2SO$ )  $\delta$  -113.766 – -113.836; IR spectrum in film ( $\nu_{max}$ ,  $cm^{-1}$ ) 3346, 1654, 1465, 1450, 1400, 1256; HRMS (ESI)  $m/z$  Calcd for  $[C_{14}H_{16}FN_2]$  requires  $[M+H]^+$  231.1298, found 231.1311.

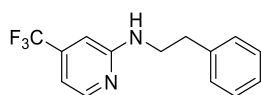

**N-Phenethyl-4-(trifluoromethyl)pyridin-2-amine (4g).** The crude product was purified by column chromatography (hexane/EtOAc = 90/10) to afford **4g** as a brown oil, (118.4 mg, 89%):  $^1H$  NMR (400 MHz,  $(CD_3)_2SO$ )  $\delta$  8.20 (d,  $J$  = 5.2 Hz, 1H), 7.32–7.26 (m, 5H), 7.24–7.16 (m, 1H), 6.74 (s, 1H), 6.70 (d,  $J$  = 5.1 Hz, 1H), 3.55–3.50 (m, 2H), 2.85–2.82 (m, 2H);  $^{13}C\{^1H\}$  NMR (100 MHz,  $(CD_3)_2SO$ )  $\delta$  159.4, 150.0, 140.2, 137.8, 137.5, 129.1, 128.8, 126.5, 124.0 (C-F,  $^1J_{C-F}$  = 270.7 Hz), 122.4, 106.2 (C-F,  $^3J_{C-F}$  = 5.9 Hz), 104.3, 42.8, 35.4;  $^{19}F$  NMR (376 MHz,  $(CD_3)_2SO$ )  $\delta$  -64.06; IR spectrum in film ( $\nu_{max}$ ,  $cm^{-1}$ ) 3350, 1683,

1462, 1450, 1350, 1250 ; HRMS (ESI)  $m/z$  Calcd for  $[C_{14}H_{14}F_3N_2]$  requires  $[M+H]^+$  267.1109, found 267.1119.

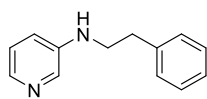

**N-Phenethylpyridin-3-amine (4h).** The crude product was product was purified by column chromatography (hexane/EtOAc = 85/15) to afford **4h** as a brown oil, (66.3 mg, 67%):  $^1H$  NMR (400 MHz,  $(CD_3)_2SO$ )  $\delta$  8.06 (d,  $J = 2.3$  Hz, 1H), 7.81 (d,  $J = 3.8$  Hz, 1H), 7.33–7.28 (m, 4H), 7.23–7.19 (m, 1H), 7.08 (dd,  $J_1 = 8.1$ ,  $J_2 = 4.6$  Hz, 1H), 6.95 (dd,  $J_1 = 8.3$ ,  $J_2 = 1.5$  Hz, 1H), 5.95 (s, 1H), 3.29 (dd,  $J_1 = 11.8$ ,  $J_2 = 7.0$  Hz, 2H), 2.87 (t,  $J = 7.5$  Hz, 2H);  $^{13}C\{^1H\}$  NMR (100 MHz,  $(CD_3)_2SO$ )  $\delta$  145.2, 140.1, 137.3, 135.9, 129.2, 128.9, 126.5, 124.1, 117.8, 44.6, 35.3; IR spectrum in film ( $\nu_{max}$ ,  $cm^{-1}$ ) 3340, 1690, 1465, 1342; HRMS (ESI)  $m/z$  Calcd for  $[C_{13}H_{15}N_2]$  requires  $[M+H]^+$  199.1235, found 199.1243.

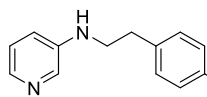

**N-(4-Methylphenethyl)pyridin-3-amine (4i).** The crude product was product was purified by column chromatography (hexane/EtOAc = 90/10) to afford **4i** as a brown oil, (67.8 mg, 64%):  $^1H$  NMR (400 MHz,  $(CD_3)_2SO$ )  $\delta$  8.05 (s, 1H), 7.80 (s, 1H), 7.16 (d,  $J = 7.9$  Hz, 2H), 7.11 – 7.06 (m, 3H), 6.93 (d,  $J = 8.3$  Hz, 1H), 5.92 (s, 1H), 3.26 (t,  $J = 7.2$  Hz, 2H), 2.82 (t,  $J = 7.4$  Hz, 2H), 2.26 (s, 3H);  $^{13}C\{^1H\}$  NMR (100 MHz,  $(CD_3)_2SO$ )  $\delta$  157.8, 148.7, 138.0, 137.2, 135.6, 129.6, 129.4, 111.9, 106.3, 51.1, 33.5, 21.4; IR spectrum in film ( $\nu_{max}$ ,  $cm^{-1}$ ) 3350, 1652, 1463, 1452, 1332; HRMS (ESI)  $m/z$  Calcd for  $[C_{14}H_{17}N_2]$  requires  $[M+H]^+$  213.1392, found 213.1390.

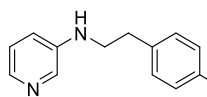

**N-(4-Chlorophenethyl)pyridin-3-amine (4j).** The crude product was product was purified by column chromatography (hexane/EtOAc = 90/10) to afford **4j** as a brown oil, (90.5 mg, 78%):  $^1H$  NMR (400 MHz,  $(CD_3)_2SO$ )  $\delta$  7.98 (s, 1H), 7.77 (s, 1H), 7.33 (dd,  $J_1 = 17.8$ ,  $J_2 = 8.3$  Hz, 4H), 7.09 (dd,  $J_1 = 8.1$ ,  $J_2 = 4.6$  Hz, 1H), 6.95 (d,  $J = 8.3$  Hz, 1H), 5.96 (s, 1H), 3.27 (t,  $J = 7.1$  Hz, 2H), 2.83 (t,  $J = 7.3$  Hz, 2H);  $^{13}C\{^1H\}$  NMR (100 MHz,  $(CD_3)_2SO$ )  $\delta$  145.2, 139.2, 136.9, 135.3, 131.2, 131.1, 128.7, 124.3, 118.2, 44.3, 34.4; IR spectrum in film ( $\nu_{max}$ ,  $cm^{-1}$ ) 3340, 1672, 1464, 1333, 790; HRMS (ESI)  $m/z$  Calcd for  $[C_{13}H_{14}ClN_2]$  requires  $[M+H]^+$  233.0846, found 233.0844.



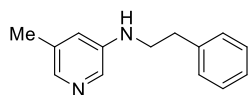

**5-Methyl-N-phenethylpyridin-3-amine (4k).**

The crude product was purified by column chromatography (hexane/EtOAc = 80/20) to afford **4k** as a brown oil, (83.7 mg, 79%):  $^1\text{H}$  NMR (400 MHz,  $\text{CDCl}_3$ )  $\delta$  7.30 (t,  $J$  = 7.3 Hz, 2H), 7.24–7.20 (m, 3H), 6.98 (d,  $J$  = 8.5 Hz, 2H), 6.53 (d,  $J$  = 8.2 Hz, 2H), 3.36 (t,  $J$  = 7.0 Hz, 2H), 2.89 (t,  $J$  = 7.1 Hz, 2H), 2.23 (s, 3H);  $^{13}\text{C}\{^1\text{H}\}$  NMR (100 MHz,  $\text{CDCl}_3$ )  $\delta$  145.9, 139.5, 129.9, 128.9, 128.7, 126.8, 126.5, 113.3, 45.6, 35.7, 20.5; IR spectrum in film ( $\nu_{\text{max}}$ ,  $\text{cm}^{-1}$ ) 3345, 1650, 1460, 1449, 1332; HRMS (ESI)  $m/z$  Calcd for  $[\text{C}_{14}\text{H}_{17}\text{N}_2]$  requires  $[\text{M}+\text{H}]^+$  213.1392, found 213.1401.

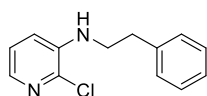

**2-Chloro-N-phenethylpyridin-3-amine (4l).**

The crude product was purified by column chromatography (hexane/EtOAc = 90/10) to afford **4l** as a brown oil, (89.3 mg, 77%):  $^1\text{H}$  NMR (400 MHz,  $(\text{CD}_3)_2\text{SO}$ )  $\delta$  7.54 (d,  $J$  = 4.2 Hz, 1H), 7.32–7.27 (m, 2H), 7.24–7.20 (m, 3H), 7.09–7.06 (m, 1H), 6.89 (d,  $J$  = 7.9 Hz, 1H), 4.58 (s, 1H), 3.39–3.37 (m, 2H), 2.93–2.91 (m, 2H);  $^{13}\text{C}\{^1\text{H}\}$  NMR (100 MHz,  $(\text{CD}_3)_2\text{SO}$ )  $\delta$  159.5, 148.4, 139.8, 137.2, 131.5, 131.2, 128.9, 112.3, 108.9, 43.1, 35.3; IR spectrum in film ( $\nu_{\text{max}}$ ,  $\text{cm}^{-1}$ ) 3350, 1687, 1461, 1256, 749; HRMS (ESI)  $m/z$  Calcd for  $[\text{C}_{13}\text{H}_{14}\text{ClN}_2]$  requires  $[\text{M}+\text{H}]^+$  233.0846, found 233.0856.

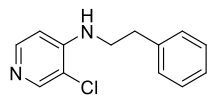

**3-Chloro-N-phenethylpyridin-4-amine (4m).**

The crude product was purified by column chromatography (hexane/EtOAc = 90/10) to afford **4m** as a brown oil, (92.8 mg, 80%):  $^1\text{H}$  NMR (400 MHz,  $(\text{CD}_3)_2\text{SO}$ )  $\delta$  8.16 (s, 1H), 8.06 (d,  $J$  = 4.5 Hz, 1H), 7.36 – 7.25 (m, 4H), 7.21 (t,  $J$  = 6.7 Hz, 1H), 6.73 (d,  $J$  = 5.6 Hz, 1H), 6.36 (t,  $J$  = 5.1 Hz, 1H), 3.44 (dd,  $J_1$  = 14.4,  $J_2$  = 6.5 Hz, 2H), 2.86 (t,  $J$  = 7.5 Hz, 2H);  $^{13}\text{C}\{^1\text{H}\}$  NMR (100 MHz,  $(\text{CD}_3)_2\text{SO}$ )  $\delta$  149.3, 148.8, 148.0, 139.6, 129.2, 128.8, 126.7, 106.4, 43.9, 34.8; IR spectrum in film ( $\nu_{\text{max}}$ ,  $\text{cm}^{-1}$ ) 3334, 1676, 1465, 1251, 750; HRMS (ESI)  $m/z$  Calcd for  $[\text{C}_{13}\text{H}_{14}\text{ClN}_2]$  requires  $[\text{M}+\text{H}]^+$  233.0846, found 233.0858.

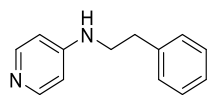

**N-Phenethylpyridin-2-amine (4n).**

The crude product was purified by column chromatography (hexane/EtOAc = 60/40) to afford **4n** as a yellow oil, (74.2 mg, 75%):  $^1\text{H}$  NMR (400 MHz,  $\text{CDCl}_3$ )  $\delta$  8.07 (s, 2H), 7.26–7.21 (m, 2H), 7.14 (dd,  $J_1$  = 19.0,  $J_2$  = 7.1 Hz, 3H), 6.36 (s, 2H), 4.76 (s, 1H), 3.33 (dd,  $J_1$  = 12.0,  $J_2$  = 6.5 Hz, 2H), 2.82 (t,  $J$  = 7.1 Hz, 2H);  $^{13}\text{C}\{^1\text{H}\}$  NMR (100 MHz,  $\text{CDCl}_3$ )  $\delta$  153.5, 149.5, 138.7, 128.8, 128.8, 126.7, 107.7, 43.8, 35.1; IR

spectrum in film ( $\nu_{\max}$ ,  $\text{cm}^{-1}$ ) 3337, 1693, 1468, 1351; HRMS (ESI)  $m/z$  Calcd for  $[\text{C}_{13}\text{H}_{14}\text{N}_2]$  requires  $[\text{M}]^+$  198.1157, found 198.1140.

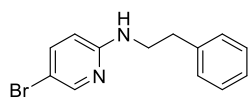

**5-Bromo-N-phenethylpyridin-2-amine (4o).** The crude product was purified by column chromatography (hexane/EtOAc = 95/5) to afford **4o** as a brown oil, (117.3 mg, 85%):  $^1\text{H}$  NMR (400 MHz,  $\text{CDCl}_3$ )  $\delta$  8.00 (d,  $J = 2.1$  Hz, 1H), 7.35 (dd,  $J_1 = 8.8, J_2 = 2.4$  Hz, 1H), 7.21 (t,  $J = 7.3$  Hz, 2H), 7.13 (dd,  $J_1 = 13.2, J_2 = 7.2$  Hz, 3H), 6.16 (d,  $J = 8.9$  Hz, 1H), 4.62 (s, 1H), 3.43 (d,  $J = 4.8$  Hz, 2H), 2.81 (t,  $J = 6.9$  Hz, 2H);  $^{13}\text{C}\{^1\text{H}\}$  NMR (100 MHz,  $\text{CDCl}_3$ )  $\delta$  157.0, 148.4, 139.7, 138.9, 128.7, 128.6, 126.4, 108.3, 106.8, 43.3, 35.4; IR spectrum in film ( $\nu_{\max}$ ,  $\text{cm}^{-1}$ ) 3347, 1670, 1465, 1342, 680; HRMS (ESI)  $m/z$  Calcd for  $[\text{C}_{13}\text{H}_{14}\text{BrN}_2]$  requires  $[\text{M}+\text{H}]^+$  277.0340, found 277.0357.

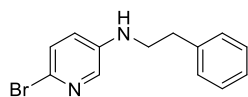

**6-Bromo-N-phenethylpyridin-3-amine (4p).** The crude product was purified by column chromatography (hexane/EtOAc = 90/10) to afford **4p** as a brown oil, (113.1 mg, 82%):  $^1\text{H}$  NMR (400 MHz,  $(\text{CD}_3)_2\text{SO}$ )  $\delta$  7.74 (d,  $J = 2.8$  Hz, 1H), 7.32 – 7.18 (m, 6H), 6.94 (dd,  $J_1 = 8.8, J_2 = 3.2$  Hz, 1H), 6.18 (t,  $J = 5.6$  Hz, 1H), 3.28 – 3.23 (m, 2H), 2.85 – 2.80 (m, 2H);  $^{13}\text{C}\{^1\text{H}\}$  NMR (100 MHz,  $(\text{CD}_3)_2\text{SO}$ )  $\delta$  145.2, 140.0, 135.0, 129.3, 128.8, 128.0, 126.7, 126.1, 122.4, 44.6, 35.1; IR spectrum in film ( $\nu_{\max}$ ,  $\text{cm}^{-1}$ ) 3350, 1690, 1462, 1340, 687; HRMS (ESI)  $m/z$  Calcd for  $[\text{C}_{13}\text{H}_{14}\text{BrN}_2]$  requires  $[\text{M}+\text{H}]^+$  277.0340, found 277.0353.

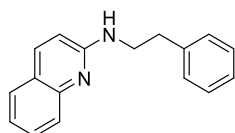

**N-Phenethylquinolin-2-amine (4q).** The crude product was purified by column chromatography (hexane/EtOAc = 90/10) to afford **4q** as a brown oil, (71.9 mg, 58%):  $^1\text{H}$  NMR (400 MHz,  $(\text{CD}_3)_2\text{SO}$ )  $\delta$  7.83 (d,  $J = 8.9$  Hz, 1H), 7.61 (d,  $J = 8.0$  Hz, 1H), 7.53 (d,  $J = 8.1$  Hz, 1H), 7.48–7.44 (m, 1H), 7.34–7.29 (m, 4H), 7.24–7.19 (m, 1H), 7.16–7.12 (m, 2H), 6.81–6.74 (m, 1H), 3.64–3.59 (m, 2H), 2.92 (t,  $J = 7.6$  Hz, 2H);  $^{13}\text{C}\{^1\text{H}\}$  NMR (100 MHz,  $(\text{CD}_3)_2\text{SO}$ )  $\delta$  159.3, 148.1, 140.6, 139.8, 138.4, 137.0, 129.8, 129.3, 127.6, 127.6, 127.0, 126.9, 111.9, 108.6, 42.9, 35.3; IR spectrum in film ( $\nu_{\max}$ ,  $\text{cm}^{-1}$ ) 3346, 1685, 1462, 1340; HRMS (ESI)  $m/z$  Calcd for  $[\text{C}_{17}\text{H}_{17}\text{N}_2]$  requires  $[\text{M}+\text{H}]^+$  249.1392, found 249.1403.

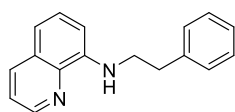

**N-Phenethylquinolin-8-amine (4r).** The crude product was purified by column chromatography (hexane/EtOAc = 90/10) to afford **4r** as a brown oil, (68.2

mg, 55%):  $^1\text{H}$  NMR (400 MHz,  $(\text{CD}_3)_2\text{SO}$ )  $\delta$  8.71 (d,  $J = 4.0$ , 1H), 8.20 (d,  $J = 6.8$  Hz, 1H), 7.49–7.46 (m, 1H), 7.39–7.23 (m, 6H), 7.06 (d,  $J = 8.0$  Hz, 1H), 6.74 (d,  $J = 7.6$  Hz, 1H), 6.46 (t,  $J = 5.4$  Hz, 1H), 3.52 (q,  $J = 6.8$  Hz, 2H), 2.99 (t,  $J = 7.4$  Hz, 2H);  $^{13}\text{C}\{^1\text{H}\}$  NMR (100 MHz,  $(\text{CD}_3)_2\text{SO}$ )  $\delta$  147.3, 144.7, 140.1, 136.4, 129.2, 128.9, 128.3, 126.6, 122.2, 113.7, 104.8, 44.5, 35.1; IR spectrum in film ( $\nu_{\text{max}}$ ,  $\text{cm}^{-1}$ ) 3350, 1690, 1465, 1339; HRMS (ESI)  $m/z$  Calcd for  $[\text{C}_{17}\text{H}_{17}\text{N}_2]$  requires  $[\text{M}+\text{H}]^+$  249.1392, found 249.1404.

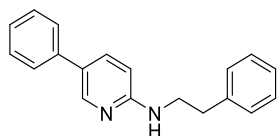

**N-Phenethyl-5-phenylpyridin-2-amine (4s).** The crude product was

product was purified by column chromatography (hexane/EtOAc = 90/10) to afford **4s** as a brown oil, (106.9 mg, 78%):  $^1\text{H}$  NMR (400 MHz,  $(\text{CD}_3)_2\text{SO}$ )  $\delta$  8.34 (d,  $J = 2.3$  Hz, 1H), 7.71 (dd,  $J_1 = 8.8$ ,  $J_2 = 2.5$  Hz, 1H), 7.58 (d,  $J = 7.3$  Hz, 2H), 7.41 (t,  $J = 7.6$  Hz, 2H), 7.33–7.19 (m, 6H), 6.79 (t,  $J = 5.3$  Hz, 1H), 6.59 (d,  $J = 8.8$  Hz, 1H), 3.53 (dd,  $J_1 = 13.8$ ,  $J_2 = 6.5$  Hz, 2H), 2.87 (t,  $J = 7.4$  Hz, 2H);  $^{13}\text{C}\{^1\text{H}\}$  NMR (100 MHz,  $(\text{CD}_3)_2\text{SO}$ )  $\delta$  158.5, 145.8, 140.4, 138.6, 135.6, 129.3, 129.1, 128.8, 126.7, 126.4, 125.8, 124.0, 108.8, 43.0, 35.7; IR spectrum in film ( $\nu_{\text{max}}$ ,  $\text{cm}^{-1}$ ) 3340, 1695, 1463, 1266; HRMS (ESI)  $m/z$  Calcd for  $[\text{C}_{19}\text{H}_{19}\text{N}_2]$  requires  $[\text{M}+\text{H}]^+$  275.1548, found 275.1542.

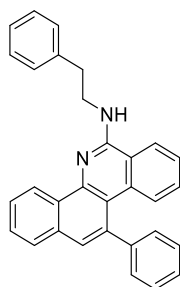

**N-Phenethyl-11-phenylbenzo[c]phenanthridine-6-amine (4t).** The crude

product was purified by column chromatography (hexane/EtOAc = 90/10) to afford **4t** as a brown oil, (148.0 mg, 69%):  $^1\text{H}$  NMR (400 MHz,  $\text{CDCl}_3$ )  $\delta$  9.24 (d,  $J = 7.2$  Hz, 1H), 7.78–7.76 (m, 1H), 7.64–7.51 (m, 4H), 7.47 (s, 1H), 7.40–7.28 (m, 10H), 7.23–7.12 (m, 2H), 5.46 (t,  $J = 4.8$  Hz, 1H), 4.11 (q,  $J = 6.8$  Hz, 2H), 3.14 (t,  $J = 6.8$  Hz, 2H);  $^{13}\text{C}\{^1\text{H}\}$  NMR (100 MHz,  $\text{CDCl}_3$ )  $\delta$  152.9, 145.1, 142.9, 140.0, 137.6, 134.6, 133.0, 130.7, 129.1, 129.0, 128.8, 128.3, 127.4, 127.1, 126.5, 126.1, 125.9, 125.8, 125.2, 121.5, 119.5, 115.2, 43.2, 35.7; IR spectrum in film ( $\nu_{\text{max}}$ ,  $\text{cm}^{-1}$ ) 3317, 1644, 1461, 1331; HRMS (ESI)  $m/z$  Calcd for  $[\text{C}_{30}\text{H}_{25}\text{N}_2]$  requires  $[\text{M}+\text{H}]^+$  425.2018, found 425.2029.

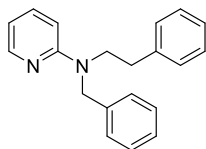

**N-Benzyl-N-phenethylpyridin-2-amine (4u).** The crude product was product was purified by column chromatography (hexane/EtOAc = 90/10) to afford **4u** as a brown oil, (132.5 mg, 92%):  $^1\text{H}$  NMR (400 MHz,  $\text{CDCl}_3$ )  $\delta$  8.20 (d,  $J = 3.5$  Hz, 1H), 7.41 – 7.31 (m, 1H), 7.30 – 7.21 (m, 4H), 7.18 (t,  $J = 7.0$  Hz, 6H), 6.58 – 6.48 (m, 1H), 6.44 (d,  $J = 8.6$  Hz, 1H), 4.62 (s, 2H), 3.73(t,  $J = 5.6$  Hz, 2H), 2.90 (t,  $J = 7.8$  Hz, 2H);  $^{13}\text{C}\{^1\text{H}\}$  NMR (100 MHz,  $\text{CDCl}_3$ )  $\delta$  158.1, 148.3, 139.8, 138.9, 137.3, 129.0, 128.7, 128.6, 127.1, 127.0, 126.3, 112.0, 105.9, 52.0, 50.6, 33.9; IR spectrum in film ( $\nu_{\text{max}}$ ,  $\text{cm}^{-1}$ ) 3346, 1686, 1461, 1341; HRMS (ESI)  $m/z$  Calcd for  $[\text{C}_{20}\text{H}_{21}\text{N}_2]$  requires  $[\text{M}+\text{H}]^+$  289.1705, found 289.1718.

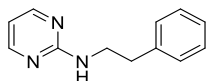

**N-Phenethylpyrimidin-2-amine (6a).** The crude product was product was purified by column chromatography (hexane/EtOAc = 90/10) to afford **6a** as a brown oil, (78.6 mg, 79%):  $^1\text{H}$  NMR (400 MHz,  $(\text{CD}_3)_2\text{SO}$ )  $\delta$  8.28(d,  $J = 4.2$  Hz, 2H), 7.30–7.17 (m, 6H), 6.55 (t,  $J = 4.7$  Hz, 1H), 3.51 (q,  $J = 6.3$  Hz, 2H), 2.85(t,  $J = 7.6$  Hz, 2H);  $^{13}\text{C}\{^1\text{H}\}$  NMR (100 MHz,  $(\text{CD}_3)_2\text{SO}$ )  $\delta$  162.7, 158.4, 140.2, 129.1, 128.7, 126.4, 110.4, 42.8, 35.5; IR spectrum in film ( $\nu_{\text{max}}$ ,  $\text{cm}^{-1}$ ) 3338, 1695, 1460, 1340; HRMS (ESI)  $m/z$  Calcd for  $[\text{C}_{12}\text{H}_{14}\text{N}_3]$  requires  $[\text{M}+\text{H}]^+$  200.1188, found 200.1192.

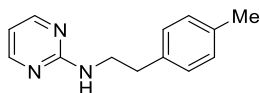

**N-(4-Methylphenethyl)pyrimidin-2-amine (6b).** The crude product was product was purified by column chromatography (hexane/EtOAc = 90/10) to afford **6b** as a brown oil, (78.8 mg, 74%):  $^1\text{H}$  NMR (400 MHz,  $(\text{CD}_3)_2\text{SO}$ )  $\delta$  8.28 (d,  $J = 3.4$  Hz, 2H), 7.21 (t,  $J = 5.6$  Hz, 1H), 7.13 (d,  $J = 8.0$  Hz, 2H), 7.09 (d,  $J = 8.0$  Hz, 2H), 6.55 (t,  $J = 4.7$  Hz, 1H), 3.49 (dd,  $J_1 = 14.8$ ,  $J_2 = 6.1$  Hz, 2H), 2.81 (t,  $J = 7.5$  Hz, 2H), 2.26 (s, 3H);  $^{13}\text{C}\{^1\text{H}\}$  NMR (100 MHz,  $(\text{CD}_3)_2\text{SO}$ )  $\delta$  162.7, 158.4, 137.1, 135.4, 129.4, 129.0, 110.4, 43.0, 35.1, 21.1; IR spectrum in film ( $\nu_{\text{max}}$ ,  $\text{cm}^{-1}$ ) 3350, 1690, 1464, 1449, 1342; HRMS (ESI)  $m/z$  Calcd for  $[\text{C}_{13}\text{H}_{16}\text{N}_3]$  requires  $[\text{M}+\text{H}]^+$  214.1344, found 214.1348.

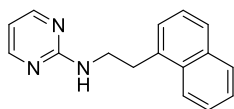

**N-(2-(Naphthalen-1-yl)ethyl)pyrimidin-2-amine (6c).** The crude product was product was purified by column chromatography (hexane/EtOAc = 90/10) to afford **6c** as a brown oil, (105.8 mg, 85%):  $^1\text{H}$  NMR (400 MHz,  $(\text{CD}_3)_2\text{SO}$ )  $\delta$  8.28 (s, 2H), 8.18 (d,  $J = 8.2$  Hz,

1H), 7.86 (d,  $J = 8.8$  Hz, 1H), 7.74 (d,  $J = 8.0$  Hz, 1H), 7.55–7.46 (m, 2H), 7.42–7.35 (m, 2H), 6.53 (t,  $J = 4.8$  Hz, 1H), 5.47 (s, 1H), 3.81 (q,  $J = 6.8$  Hz, 2H), 3.39 (t,  $J = 7.1$  Hz, 2H);  $^{13}\text{C}\{^1\text{H}\}$ NMR (100 MHz,  $(\text{CD}_3)_2\text{SO}$ )  $\delta$  162.1, 158.1, 135.3, 134.0, 132.1, 129.0, 127.3, 127.0, 126.1, 125.7, 125.6, 123.9, 110.6, 42.1, 33.0; IR spectrum in film ( $\nu_{\text{max}}$ ,  $\text{cm}^{-1}$ ) 3350, 1690, 1464, 1449, 1342; HRMS (ESI)  $m/z$  Calcd for  $[\text{C}_{16}\text{H}_{16}\text{N}_3]$  requires  $[\text{M}+\text{H}]^+$  250.1344, found 250.1350.

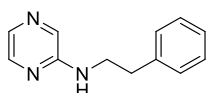

**N-Phenethylpyrazin-2-amine (7a).** The crude product was product was purified by column chromatography (hexane/EtOAc = 85/15) to afford **7a** as a brown oil, (74.6 mg, 75%):  $^1\text{H}$  NMR (400 MHz,  $(\text{CD}_3)_2\text{SO}$ )  $\delta$  7.96 (s, 2H), 7.66 (d,  $J = 2.2$  Hz, 1H), 7.32–7.16 (m, 6H), 3.52 (q,  $J = 6.7$  Hz, 2H), 2.86(t,  $J = 7.4$  Hz, 2H);  $^{13}\text{C}\{^1\text{H}\}$ NMR (100 MHz,  $(\text{CD}_3)_2\text{SO}$ )  $\delta$  155.5, 142.0, 140.2, 133.8, 131.1, 129.1, 128.8, 126.5, 42.3, 35.3; IR spectrum in film ( $\nu_{\text{max}}$ ,  $\text{cm}^{-1}$ ) 3347, 1687, 1462, 1343; HRMS (ESI)  $m/z$  Calcd for  $[\text{C}_{12}\text{H}_{14}\text{N}_3]$  requires  $[\text{M}+\text{H}]^+$  200.1188, found 200.1190.

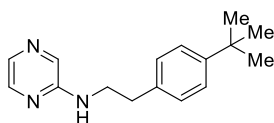

**N-(4-(tert-Butyl)phenethyl)pyrazin-2-amine (7b).** The crude product was product was purified by column chromatography (hexane/EtOAc = 90/10) to afford **7b** as a brown oil, (88.0 mg, 69%):  $^1\text{H}$  NMR (400 MHz,  $\text{CDCl}_3$ )  $\delta$  7.91 (s, 1H), 7.78 (s, 1H), 7.72 (d,  $J = 2.6$  Hz, 1H), 7.27 (d,  $J = 8.1$  Hz, 2H), 7.09 (d,  $J = 8.1$  Hz, 2H), 4.57 (s, 1H), 3.55 (q,  $J = 6.5$  Hz, 2H), 2.84 (t,  $J = 6.9$  Hz, 2H), 1.24 (s, 9H);  $^{13}\text{C}\{^1\text{H}\}$ NMR (100 MHz,  $(\text{CD}_3)_2\text{SO}$ )  $\delta$  154.6, 149.6, 142.1, 135.8, 132.9, 132.2, 128.6, 125.7, 42.6, 35.0, 34.5, 31.4; IR spectrum in film ( $\nu_{\text{max}}$ ,  $\text{cm}^{-1}$ ) 3350, 1695, 1461, 1452, 1341; HRMS (ESI)  $m/z$  Calcd for  $[\text{C}_{16}\text{H}_{22}\text{N}_3]$  requires  $[\text{M}+\text{H}]^+$  256.1814, found 256.1819.

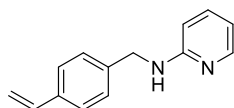

**N-(4-Vinylbenzyl)pyridin-2-amine (8a).** The crude product was product was purified by column chromatography (hexane/EtOAc = 90/10) to afford **8a** as a brown oil, (71.4 mg, 68%):  $^1\text{H}$  NMR (400 MHz,  $\text{CDCl}_3$ )  $\delta$  8.09 (s, 1H), 7.34 (dd,  $J_1 = 25.0$ ,  $J_2 = 7.7$  Hz, 5H), 6.73–6.55 (m, 2H), 6.34 (d,  $J = 8.4$  Hz, 1H), 5.73 (d,  $J = 17.6$  Hz, 1H), 5.22 (d,  $J = 10.9$  Hz, 1H), 5.10 (s, 1H), 4.47 (d,  $J = 5.5$  Hz, 2H);  $^{13}\text{C}\{^1\text{H}\}$ NMR (100 MHz,  $\text{CDCl}_3$ )  $\delta$  158.7, 148.3, 139.0, 137.5, 136.6, 127.6, 126.5, 113.8, 113.2, 106.9, 46.1; IR spectrum in film ( $\nu_{\text{max}}$ ,  $\text{cm}^{-1}$ )

3334, 1644, 1458, 1280; HRMS (ESI)  $m/z$  Calcd for  $[C_{14}H_{15}N_2]$  requires  $[M+H]^+$  211.1235, found 211.1220.

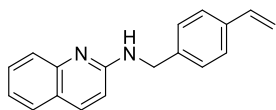

**N-(4-Vinylbenzyl)quinolin-2-amine (8b).** The crude product was product was purified by column chromatography (hexane/EtOAc = 90/10) to afford **8b** as a brown oil, (101.4 mg, 78%):  $^1H$  NMR (400 MHz,  $CDCl_3$ )  $\delta$  7.72 (d,  $J$  = 8.9 Hz, 1H), 7.63 (d,  $J$  = 8.4 Hz, 1H), 7.54 – 7.41 (m, 2H), 7.35 – 7.23 (m, 4H), 7.14 (dd,  $J_1$  = 13.3,  $J_2$  = 5.7 Hz, 1H), 6.62 (dd,  $J_1$  = 17.6,  $J_2$  = 10.9 Hz, 1H), 6.53 (d,  $J$  = 8.9 Hz, 1H), 5.65 (d,  $J$  = 17.6 Hz, 1H), 5.15 (d,  $J$  = 10.9 Hz, 1H), 5.07 (s, 1H), 4.62 (d,  $J$  = 5.5 Hz, 2H);  $^{13}C\{^1H\}$  NMR (100 MHz,  $CDCl_3$ )  $\delta$  156.7, 147.9, 139.0, 137.5, 136.7, 136.5, 129.6, 127.9, 127.5, 126.5, 123.6, 122.2, 113.8, 111.3, 45.6; IR spectrum in film ( $\nu_{max}$ ,  $cm^{-1}$ ) 3342, 1868, 1664, 1464, 1275; HRMS (ESI)  $m/z$  Calcd for  $[C_{18}H_{17}N_2]$  requires  $[M+H]^+$  261.1392, found 261.1404.

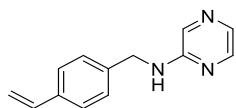

**N-(4-Vinylbenzyl)pyrazin-2-amine (8c).** The crude product was product was purified by column chromatography (hexane/EtOAc = 90/10) to afford **8c** as a brown oil, (86.5 mg, 82%):  $^1H$  NMR (400 MHz,  $CDCl_3$ )  $\delta$  7.94–7.93 (m, 1H), 7.82 (d,  $J$  = 1.2 Hz, 1H), 7.76 (d,  $J$  = 2.7 Hz, 1H), 7.32 (d,  $J$  = 8.2 Hz, 2H), 7.24 (d,  $J$  = 8.1 Hz, 2H), 6.64 (dd,  $J_1$  = 17.6,  $J_2$  = 11.0 Hz, 1H), 5.67 (d,  $J$  = 17.6 Hz, 1H), 5.18 (d,  $J$  = 10.9 Hz, 1H), 4.90 (s, 1H), 4.48 (d,  $J$  = 5.8 Hz, 2H);  $^{13}C\{^1H\}$  NMR (100 MHz,  $CDCl_3$ )  $\delta$  163.0, 158.6, 138.5, 137.2, 137.1, 128.4, 127.0, 114.2, 110.7, 49.4; IR spectrum in film ( $\nu_{max}$ ,  $cm^{-1}$ ) 3345, 1690, 1642, 1465, 1339; HRMS (ESI)  $m/z$  Calcd for  $[C_{13}H_{14}N_3]$  requires  $[M+H]^+$  212.1188, found 212.1201.

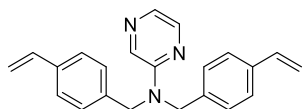

**N,N-bis(4-Vinylbenzyl)pyrazin-2-amine (8d).** The crude product was product was purified by column chromatography (hexane/EtOAc = 90/10) to afford **8d** as a brown oil, (73.6 mg, 45%):  $^1H$  NMR (400 MHz,  $CDCl_3$ )  $\delta$  8.09 (dd,  $J_1$  = 2.5,  $J_2$  = 1.6 Hz, 1H), 7.97 (d,  $J$  = 1.2 Hz, 1H), 7.84 (d,  $J$  = 2.6 Hz, 1H), 7.36 (d,  $J$  = 8.2 Hz, 4H), 7.18 (d,  $J$  = 8.1 Hz, 4H), 6.70 (dd,  $J_1$  = 17.6,  $J_2$  = 11.0 Hz, 2H), 5.73 (dd,  $J_1$  = 17.6,  $J_2$  = 0.8 Hz, 2H), 5.23 (dd,  $J_1$  = 10.9,  $J_2$  = 0.6 Hz, 2H), 4.78 (s, 4H);  $^{13}C\{^1H\}$  NMR (100 MHz,  $CDCl_3$ )  $\delta$  154.4, 141.9, 137.0, 136.9, 136.4, 132.5, 130.1, 127.3, 126.6, 113.9, 50.6; IR spectrum in film ( $\nu_{max}$ ,  $cm^{-1}$ ) 3332, 1694, 1638, 1462, 1340; HRMS (ESI)  $m/z$  Calcd for  $[C_{22}H_{22}N_3]$  requires  $[M+H]^+$  328.1814, found 328.1828.

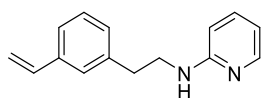

***N*-(3-Vinylphenethyl)pyridin-2-amine (12).**

The crude product was purified by column chromatography (hexane/EtOAc = 90/10) to afford **12** as a yellow oil, (91.9 mg, 82%):  $^1\text{H}$  NMR (400 MHz,  $(\text{CD}_3)_2\text{SO}$ )  $\delta$  7.98 (d,  $J$  = 4.0 Hz, 1H), 7.44–7.11 (m, 5H), 6.77–6.65 (m, 1H), 6.52 (t,  $J$  = 5.6 Hz, 1H), 6.45 (dd,  $J_1$  = 7.0,  $J_2$  = 4.9 Hz, 2H), 5.79 (dd,  $J_1$  = 17.0,  $J_2$  = 14.3 Hz, 1H), 5.22 (dd,  $J_1$  = 15.2,  $J_2$  = 11.5 Hz, 1H), 3.54–3.40 (m, 2H), 2.83 (dd,  $J_1$  = 13.9,  $J_2$  = 6.6 Hz, 2H);  $^{13}\text{C}\{^1\text{H}\}$  NMR (100MHz,  $(\text{CD}_3)_2\text{SO}$ )  $\delta$  159.2, 148.0, 140.8, 140.4, 137.5, 137.2, 137.0, 135.4, 129.4, 128.9, 128.8, 126.9, 126.5, 124.3, 114.5, 113.8, 111.9, 108.6, 42.8, 35.6, 35.9; IR spectrum in film ( $\nu_{\text{max}}$ ,  $\text{cm}^{-1}$ ) 3349, 1690, 1646, 1460, 1340; HRMS (ESI)  $m/z$  Calcd for  $[\text{C}_{15}\text{H}_{17}\text{N}_2]$  requires  $[\text{M}+\text{H}]^+$  225.1392, found 225.1405.

***N*-Phenethyl-*N*-(3-vinylphenethyl)pyridin-2-amine (12').** In an oven-dried 15 mL reaction vial, a solution of *N*-(3-Vinylphenethyl)pyridin-2-amine **12** (0.5 mmol), alkene **2a** (0.8 mmol), and KOH (1.0 equiv) in 2 mL of DMSO was heated in an oil bath at 80 °C for 3 h. Progression of the reaction was monitored by TLC analysis; after complete consumption of starting material, the reaction was cooled to room temperature. The reaction mixture was diluted with ethyl acetate (10 mL X 3) and water (10 mL X 3). The layers were separated, and the organic layer was washed with aqueous saturated brine solution and dried over  $\text{Na}_2\text{SO}_4$ . Organic layer was concentrated under reduced pressure. The crude material so obtained was purified by column chromatography on neutral/basic alumina. The structure and purity of products were confirmed by comparison of their physical and spectral data ( $^1\text{H}$  NMR,  $^{13}\text{C}$  NMR, and HRMS).

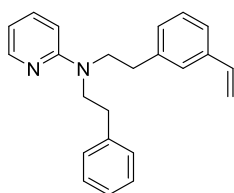

***N*-Phenethyl-*N*-(3-vinylphenethyl)pyridin-2-amine (12').**

The crude product was purified by column chromatography (hexane/EtOAc = 90/10) to afford **12'** as a brown oil, (68.92 mg, 42%):  $^1\text{H}$  NMR (400 MHz,  $\text{CDCl}_3$ )  $\delta$  8.41 (d,  $J$  = 4.1 Hz, 1H), 7.59–7.56 (m, 1H), 7.48–7.18 (m, 9H), 6.88–6.81 (m, 1H), 6.71–6.65 (m, 2H), 5.87 (dd,  $J_1$  = 17.6,  $J_2$  = 13.1 Hz, 1H), 5.36 (dd,  $J_1$  = 14.8,  $J_2$  = 10.9 Hz, 1H), 3.76 (t,  $J$  = 7.3 Hz, 4H), 3.00–2.97 (m, 4H);  $^{13}\text{C}\{^1\text{H}\}$  NMR (100 MHz,  $\text{CDCl}_3$ )  $\delta$  157.7, 148.7, 140.3, 139.8, 138.0, 137.4, 137.1, 136.9, 135.8, 129.3, 128.9, 128.7, 127.1, 126.6, 124.4, 114.1, 113.5, 111.7, 105.8, 51.5, 34.2, 34.0; IR spectrum in film ( $\nu_{\text{max}}$ ,  $\text{cm}^{-1}$ ) 1687, 1660, 1644, 1464, 1342; HRMS (ESI)  $m/z$  Calcd for  $[\text{C}_{23}\text{H}_{25}\text{N}_2]$  requires  $[\text{M}+\text{H}]^+$  329.2018, found 329.2026.

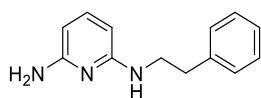

***N*<sup>2</sup>-Phenethylpyridin-2,6-diamine (14).** The crude product was purified

by column chromatography (hexane/EtOAc = 90/10) to afford **14** as a yellow oil, (84.1 mg, 79%): <sup>1</sup>H NMR (400 MHz, (CD<sub>3</sub>)<sub>2</sub>SO) δ 7.33–7.17 (m, 5H), 7.03 (t, *J* = 7.8 Hz, 1H), 5.90 (t, *J* = 5.6 Hz, 1H), 5.64–5.61 (m, 2H), 5.37 (s, 2H), 3.33 (q, *J* = 6.4 Hz, 2H), 2.79 (t, *J* = 8 Hz, 2H); <sup>13</sup>C{<sup>1</sup>H} NMR (100MHz, (CD<sub>3</sub>)<sub>2</sub>SO) δ 159.2, 158.6, 140.7, 138.5, 129.2, 128.8, 126.4, 95.3, 95.1, 43.4, 35.9; IR spectrum in film (*v*<sub>max</sub>, cm<sup>-1</sup>) 3500, 3487, 3338, 1690, 1465, 1341; HRMS (ESI) *m/z* Calcd for [C<sub>13</sub>H<sub>16</sub>N<sub>3</sub>] requires [M+H]<sup>+</sup> 214.1344, found 214.1354.

***N*<sup>2</sup>,*N*<sup>2</sup>-Diphenethylpyridine-2,6-diamine (14').** In an oven-dried 15 mL reaction vial, a solution of *N*<sup>2</sup>-Phenethylpyridin-2,6-diamine **14** (0.5 mmol), alkene **2a** (0.8 mmol), and KOH (1.0 equiv) in 2 mL of DMSO was heated in an oil bath at 80 °C for 3 h. Progression of the reaction was monitored by TLC analysis; after complete consumption of starting material, the reaction was cooled to room temperature. The reaction mixture was diluted with ethyl acetate (10 mL X 3) and water (10 mL X 3). The layers were separated, and the organic layer was washed with aqueous saturated brine solution and dried over Na<sub>2</sub>SO<sub>4</sub>. Organic layer was concentrated under reduced pressure. The crude material so obtained was purified by column chromatography on neutral/basic alumina. The structure and purity of products were confirmed by comparison of their physical and spectral data (<sup>1</sup>H NMR, <sup>13</sup>C NMR, and HRMS).

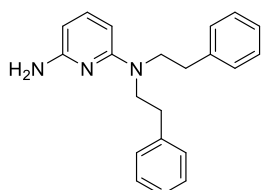

***N*<sup>2</sup>,*N*<sup>2</sup>-Diphenethylpyridine-2,6-diamine (14').**The crude product was

product was purified by column chromatography (hexane/EtOAc = 90/10) to afford **14'** as a brown oil, (76.12 mg, 48%): <sup>1</sup>H NMR (400 MHz, CDCl<sub>3</sub>) δ 7.24 – 7.16 (m, 5H), 7.12 (d, *J* = 6.7 Hz, 6H), 5.79 (dd, *J*<sub>1</sub> = 56.7, *J*<sub>2</sub> = 7.9 Hz, 2H), 4.07 (s, 2H), 3.51 – 3.44 (m, 4H), 2.80 – 2.73 (m, 4H); <sup>13</sup>C{<sup>1</sup>H}NMR (100 MHz, CDCl<sub>3</sub>) δ 157.5, 157.0, 140.1, 139.0, 128.9, 128.5, 126.1, 95.4, 95.1, 51.2, 34.2; IR spectrum in film (*v*<sub>max</sub>, cm<sup>-1</sup>) 3450, 1686, 1650, 1645, 1465, 1341; HRMS (ESI) *m/z* Calcd for [C<sub>21</sub>H<sub>24</sub>N<sub>3</sub>] requires [M+H]<sup>+</sup> 318.1970, found 318.1971.

***N,N*-(Diphenethylpyridin-2-amine) (15a-c).** In an oven-dried 15 mL reaction vial, a solution of *N*-Phenethylpyridin-2-amine **3a** (0.5 mmol), alkene **2** (0.8 mmol) and KOH (1.0 equiv) in 2 mL of DMSO was heated in an oil bath at 80 °C for 6 h. Progression of the reaction was



monitored by TLC analysis; after complete consumption of starting material, the reaction was cooled to room temperature. The reaction mixture was diluted with ethyl acetate (10 mL X 3) and water (10 mL X 3). The layers were separated, and the organic layer was washed with aqueous saturated brine solution and dried over Na<sub>2</sub>SO<sub>4</sub>. Organic layer was concentrated under reduced pressure. The crude material so obtained was purified by column chromatography on neutral/basic alumina. The structure and purity of products were confirmed by comparison of their physical and spectral data (<sup>1</sup>H NMR, <sup>13</sup>C NMR, and HRMS).

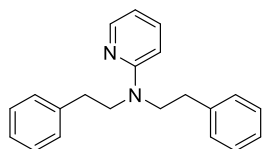

***N,N*-(Diphenethylpyridin-2-amine) (15a).** The crude product was

purified by column chromatography (hexane/EtOAc = 90/10) to afford **15a** as a yellow oil, (113.3 mg, 75%): <sup>1</sup>H NMR (400 MHz, CDCl<sub>3</sub>) δ 8.22 (dd, *J*<sub>1</sub> = 4.9, *J*<sub>2</sub> = 1.4 Hz, 1H), 7.47–7.43 (m, 1H), 7.31–7.26 (m, 4H), 7.22–7.18 (m, 6H), 6.56–6.51 (m, 2H), 3.59 (t, *J* = 7.6 Hz, 4H), 2.84 (t, *J* = 7.6 Hz, 4H); <sup>13</sup>C{<sup>1</sup>H} NMR (100MHz, CDCl<sub>3</sub>) δ 157.5, 148.4, 139.9, 137.2, 128.9, 128.5, 126.3, 111.4, 105.6, 51.3, 34.0; IR spectrum in film (*v*<sub>max</sub>, cm<sup>-1</sup>) 3350, 1692, 1465, 1340; HRMS (ESI) *m/z* Calcd for [C<sub>21</sub>H<sub>23</sub>N<sub>2</sub>] requires [M+H]<sup>+</sup> 303.1861, found 303.1875.

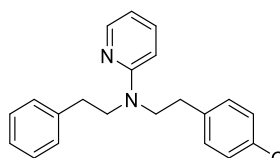

***N*-(4-Chlorophenethyl)-*N*-phenethylaniline (15b).** The crude product

was purified by column chromatography (hexane/EtOAc = 98/2) to afford **15b** as a yellow oil, (139.4 mg, 83%): <sup>1</sup>H NMR (400 MHz, CDCl<sub>3</sub>) δ 8.13 (ddd, *J*<sub>1</sub> = 4.9, *J*<sub>2</sub> = 1.9, *J*<sub>3</sub> = 0.8 Hz, 1H), 7.39–7.35 (m, 1H), 7.23–7.10 (m, 6H), 7.04–7.01 (m, 2H), 6.49–6.46 (m, 1H), 6.42 (d, *J* = 8.7 Hz, 1H), 3.46–3.51 (m, 4H), 2.71–2.78 (m, 4H); <sup>13</sup>C{<sup>1</sup>H} NMR (100 MHz, CDCl<sub>3</sub>) δ 157.4, 148.4, 139.7, 138.4, 137.2, 132.0, 130.3, 129.0, 128.6, 126.3, 111.6, 105.7, 51.5, 51.2, 34.0, 33.5; IR spectrum in film (*v*<sub>max</sub>, cm<sup>-1</sup>) 3354, 1682, 1469, 1345; HRMS (ESI) *m/z* Calcd for [C<sub>21</sub>H<sub>22</sub>ClN<sub>2</sub>] requires [M+H]<sup>+</sup> 337.1472, found 337.1475.

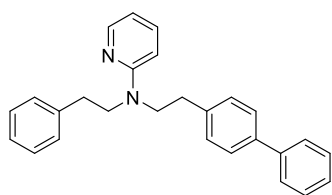

***N*-(2-([1,1'-Biphenyl]-4-yl)ethyl)-*N*-phenethylaniline (15c).** The

crude product was purified by column chromatography (hexane/EtOAc = 85/5) to afford **15c** as a yellow oil, (155.1 mg, 82%): <sup>1</sup>H NMR (400 MHz, CDCl<sub>3</sub>) δ 8.15 (d, *J* = 3.7 Hz, 1H), 7.50

(d,  $J = 7.3$  Hz, 2H), 7.44 (d,  $J = 7.9$  Hz, 2H), 7.40–7.33 (m, 3H), 7.27–7.12 (m, 8H), 6.50–6.45 (m, 2H), 3.56 (t,  $J = 7.3$  Hz, 4H), 2.80 (q,  $J = 6.3$  Hz, 4H);  $^{13}\text{C}\{^1\text{H}\}$  NMR (100 MHz,  $\text{CDCl}_3$ )  $\delta$  157.4, 148.4, 141.0, 140.0, 139.2, 139.0, 137.1, 129.3, 128.9, 128.7, 128.5, 127.2, 127.1, 127.0, 126.2, 111.4, 105.6, 51.3, 51.2, 34.0, 33.6; IR spectrum in film ( $\nu_{\text{max}}$ ,  $\text{cm}^{-1}$ ) 3340, 1695, 1475, 1330; HRMS (ESI)  $m/z$  Calcd for  $[\text{C}_{27}\text{H}_{27}\text{N}_2]$  requires  $[\text{M}+\text{H}]^+$  379.2174, found 379.2175.

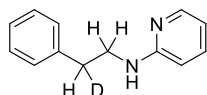

***N*-(2-Phenethyl-2-*d*)pyridin-2-amine (3a').** The crude product was purified by column chromatography (hexane/EtOAc = 90/10) to afford **3a'** as a yellow oil, (77.6 mg, 78%);  $^1\text{H}$  NMR (400 MHz,  $(\text{CD}_3)_2\text{SO}$ )  $\delta$  7.98 (d,  $J = 2.7$  Hz, 1H), 7.36–7.18 (m, 6H), 6.53 (s, 1H), 6.46 (d,  $J = 7.3$  Hz, 2H), 3.44 (t,  $J = 6.0$  Hz, 2H), 2.81 (t,  $J = 7.1$  Hz, 1H);  $^{13}\text{C}\{^1\text{H}\}$  NMR (100 MHz,  $(\text{CD}_3)_2\text{SO}$ )  $\delta$  159.3, 148.1, 140.5, 137.0, 129.2, 128.8, 126.4, 111.9, 108.6, 42.9, 35.7–35.2 (m); HRMS (ESI)  $m/z$  Calcd for  $[\text{C}_{13}\text{H}_{13}\text{DN}_2]$  requires  $[\text{M}]^+$  199.1220, found 199.1240.

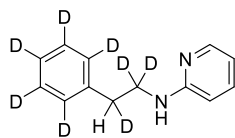

***N*-(2-(Phenyl-*d*<sub>5</sub>)ethyl-1,1,2-*d*<sub>3</sub>)pyridin-2-amine (3a'').** The crude product was purified by column chromatography (hexane/EtOAc = 90/10) to afford **3a''** as a yellow oil, (76.2 mg, 74%);  $^1\text{H}$  NMR (400 MHz,  $(\text{CD}_3)_2\text{SO}$ )  $\delta$  8.03 (d,  $J = 3.8$  Hz, 1H), 7.37–7.33 (m, 1H), 6.52–6.46 (m, 3H), 2.86–2.84 (m, 1H);  $^{13}\text{C}\{^1\text{H}\}$  NMR (100 MHz,  $(\text{CD}_3)_2\text{SO}$ )  $\delta$  159.3, 148.1, 140.3, 137.0, 129.3–128.0 (m), 126.1–125.6 (m), 112.0, 108.5, 42.9–42.0 (m), 35.6–35.0 (m); HRMS (ESI)  $m/z$  Calcd for  $[\text{C}_{13}\text{H}_6\text{D}_8\text{N}_2]$  requires  $[\text{M}]^+$  206.1659, found 206.1660.

**COPIES OF  $^1\text{H}$  NMR,  $^{13}\text{C}$  NMR, HRMS**

# <sup>1</sup>H NMR

(400 MHz, (CD<sub>3</sub>)<sub>2</sub>SO)

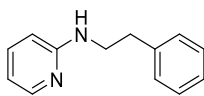

*N*-Phenethylpyridin-2-amine (3a)

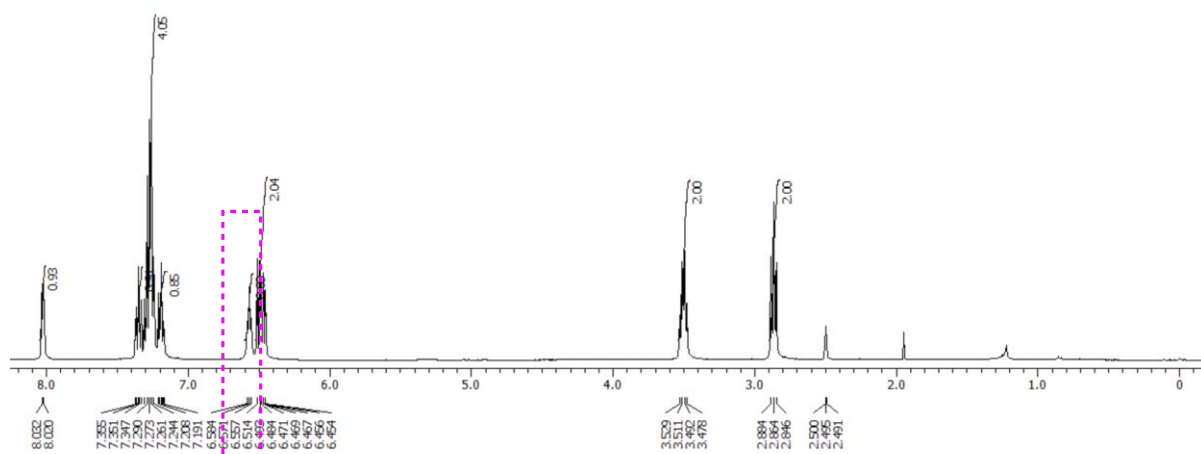

<sup>1</sup>H NMR Of 3a (400 MHz, (CD<sub>3</sub>)<sub>2</sub>SO) +D<sub>2</sub>O (4:1)

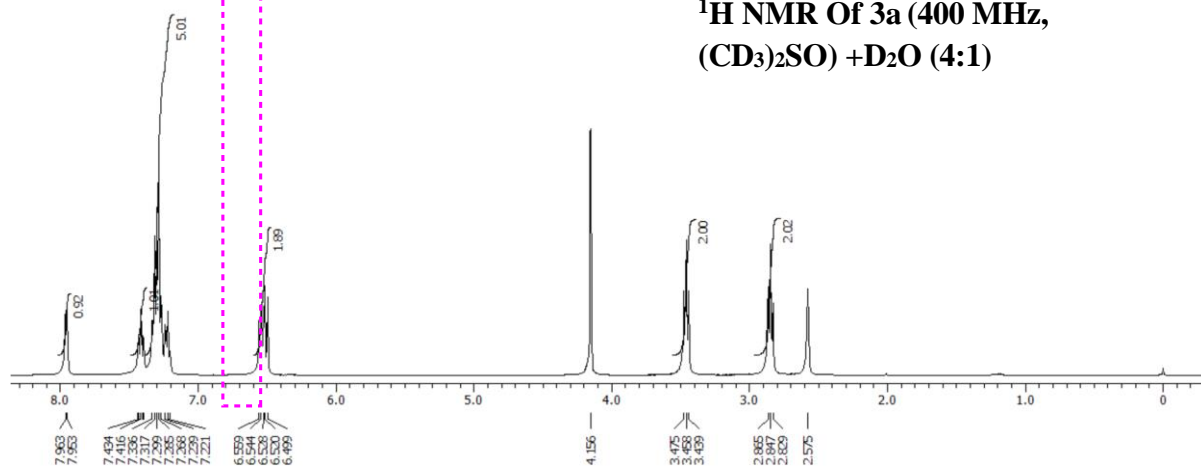

**$^{13}\text{C}$  NMR**

**(100 MHz,  $(\text{CD}_3)_2\text{SO}$ )**



***N*-Phenethylpyridin-2-amine (3a)**

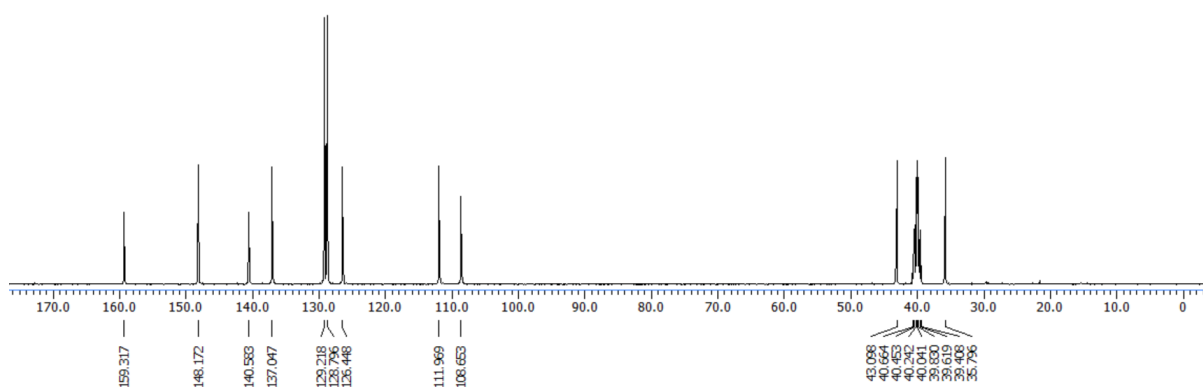

# HRMS

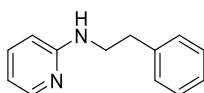

***N*-Phenethylpyridin-2-amine (3a)**

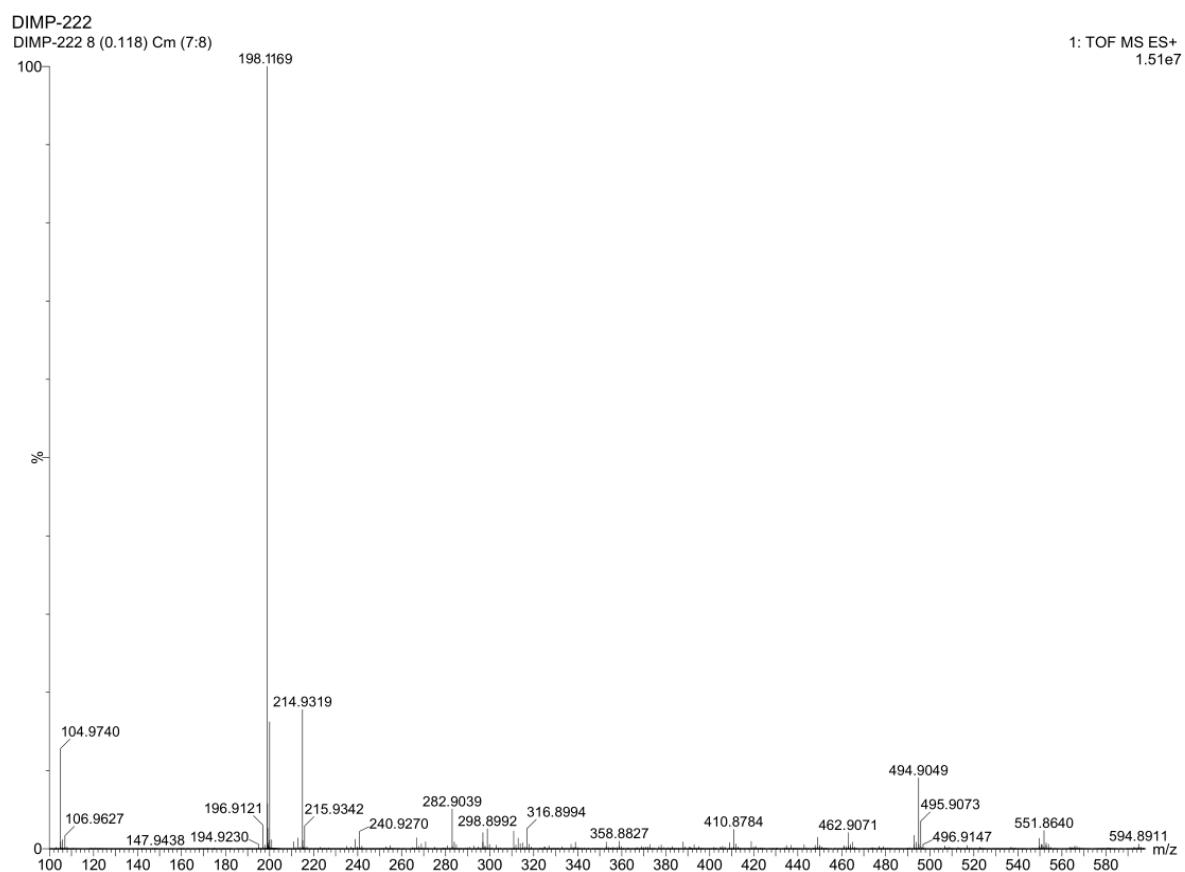

**$^1\text{H}$  NMR**  
**(400 MHz,  $(\text{CD}_3)_2\text{SO}$ )**

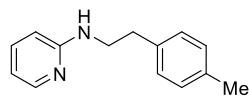

***N*-(4-Methylphenethyl)pyridin-2-amine (3b)**

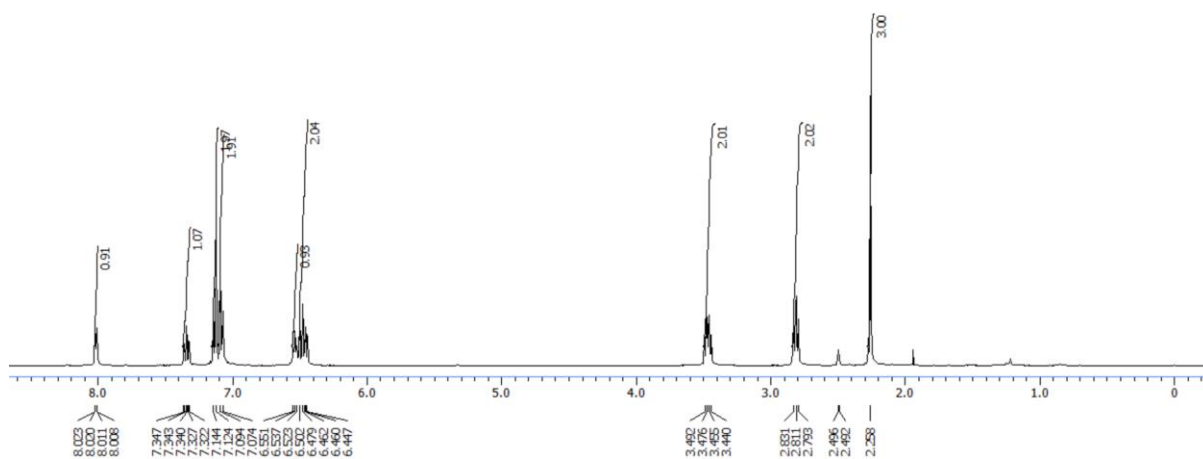

**$^{13}\text{C}$  NMR**  
**(100 MHz,  $(\text{CD}_3)_2\text{SO}$ )**

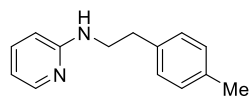

***N*-(4-Methylphenethyl)pyridin-2-amine (3b)**

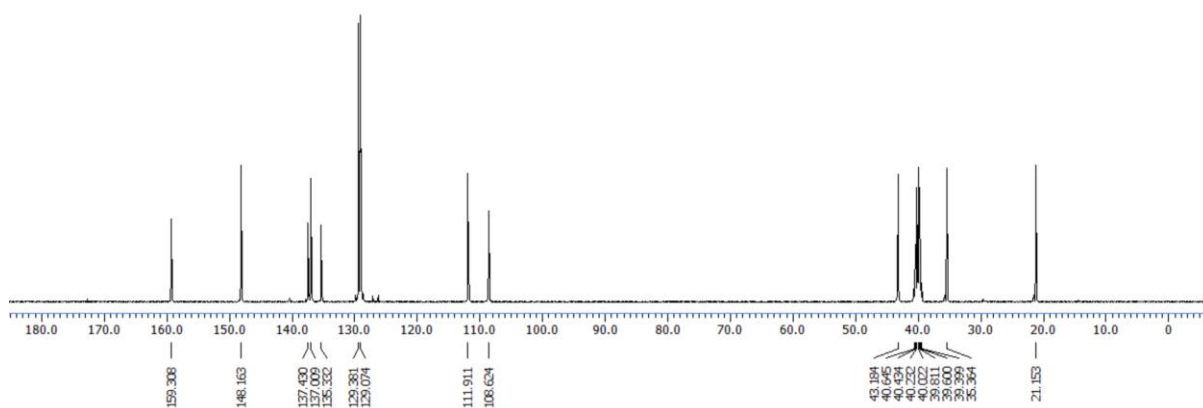

# HRMS

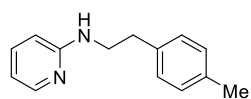

***N*-(4-Methylphenethyl)pyridin-2-amine (3b)**

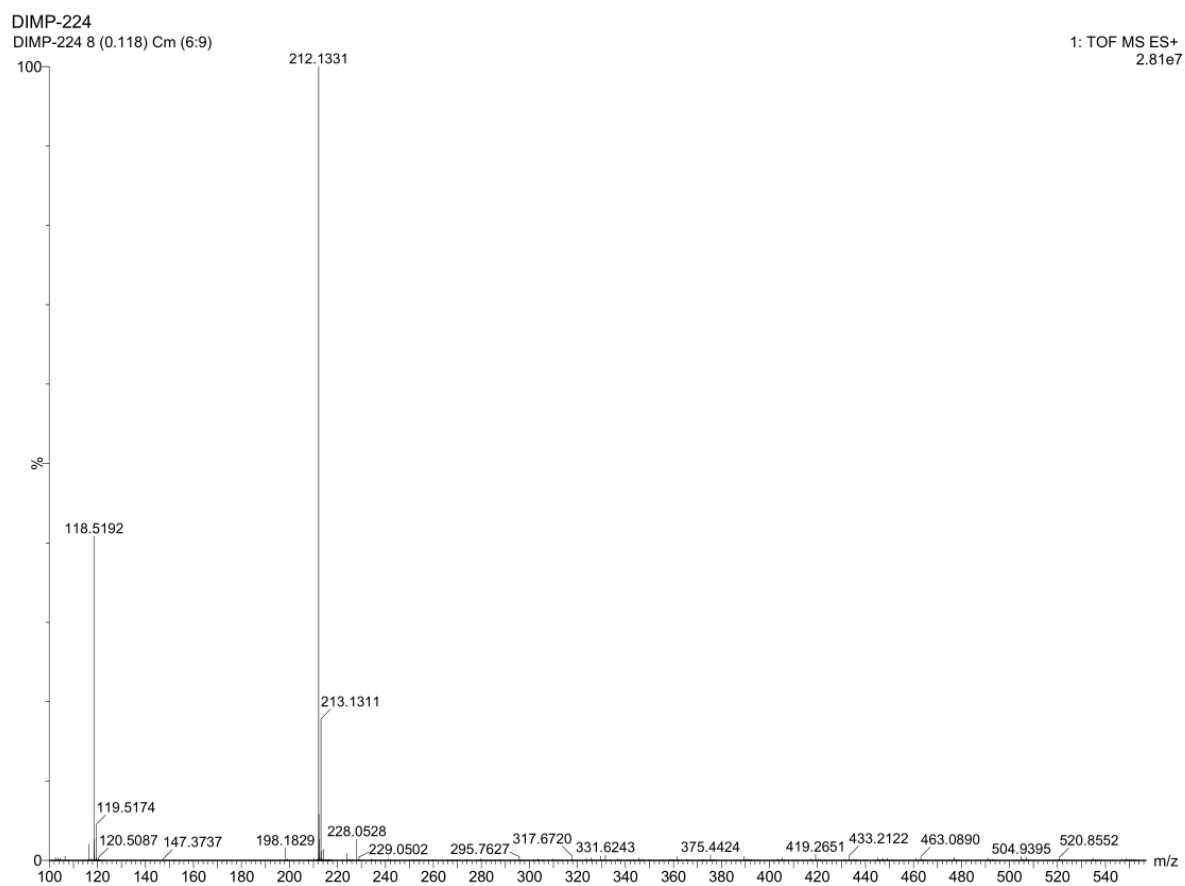



**$^1\text{H}$  NMR**  
**(400 MHz,  $(\text{CD}_3)_2\text{SO}$ )**

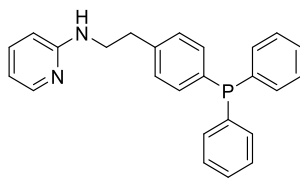

***N*-(4-diphenylphosphanyl)phenethylpyridin-2-amine (3c)**

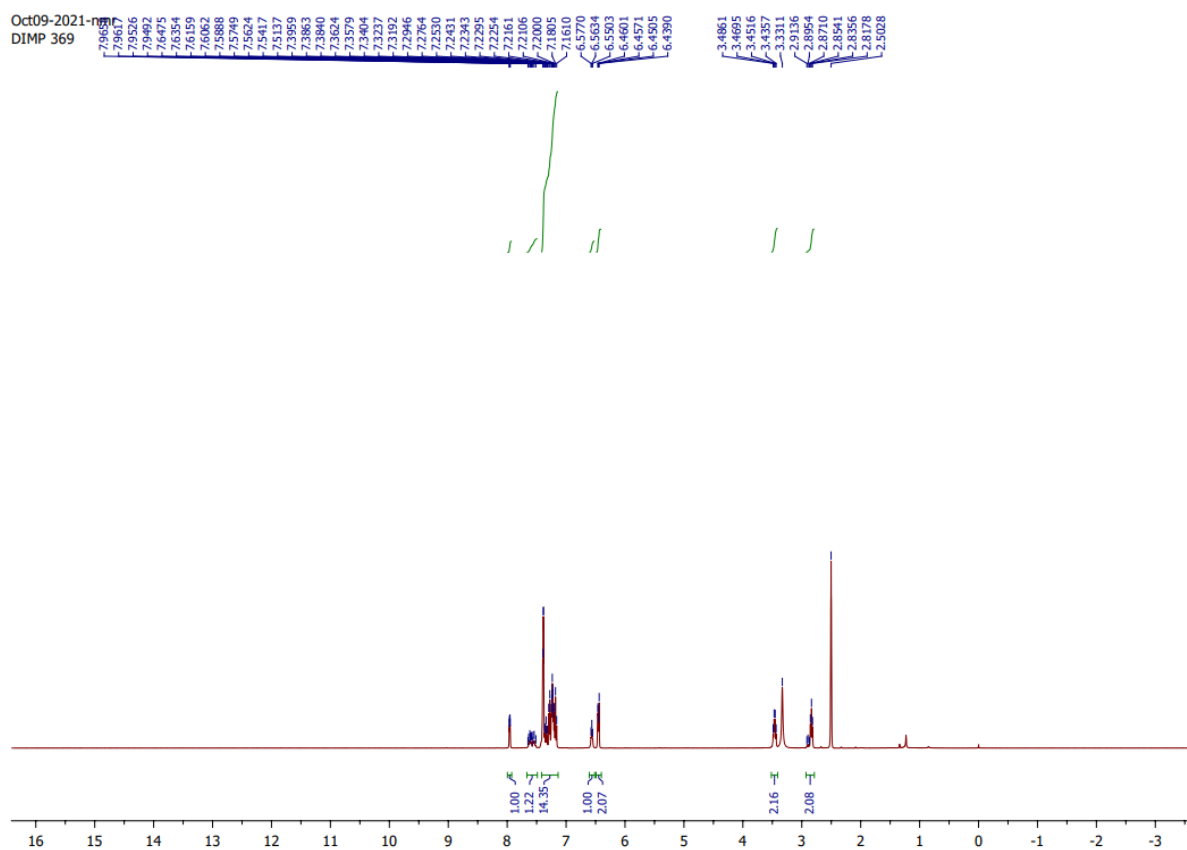

# <sup>13</sup>C NMR

(100 MHz, (CD<sub>3</sub>)<sub>2</sub>SO)



***N*-(4-diphenylphosphanyl)phenethylpyridin-2-amine (3c)**

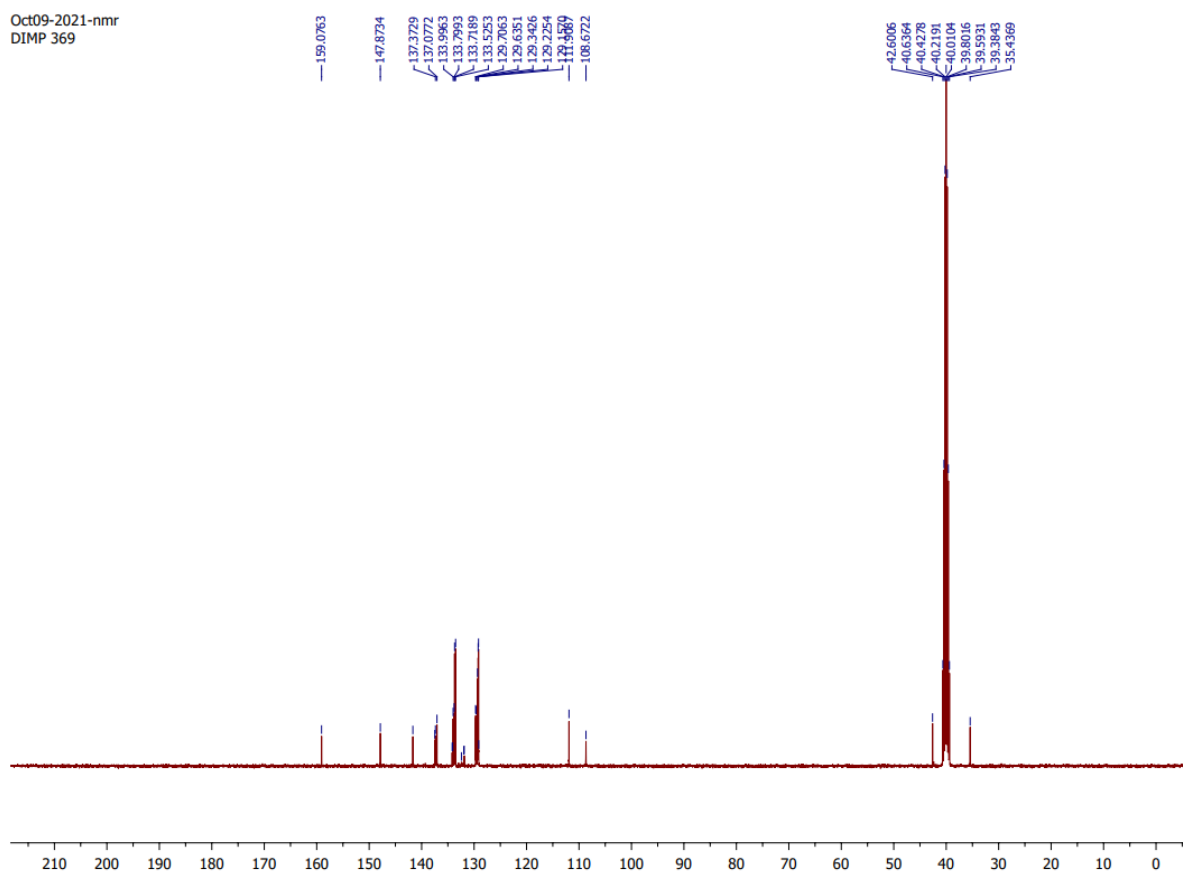

## HRMS

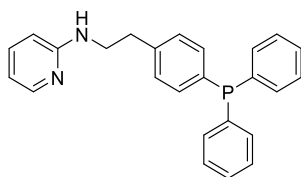

***N*-(4-diphenylphosphanyl)phenethylpyridin-2-amine (3c)**

Y:\Old Data\_2021\10122021\5

12/10/21 17:04:08

5#120-222 RT: 0.49-0.90 AV: 103 SB: 639 0.83-3.00, 0.01-0.45 NL: 9.97E7  
T: FTMS + p ESI Full ms [50.00-2000.00]

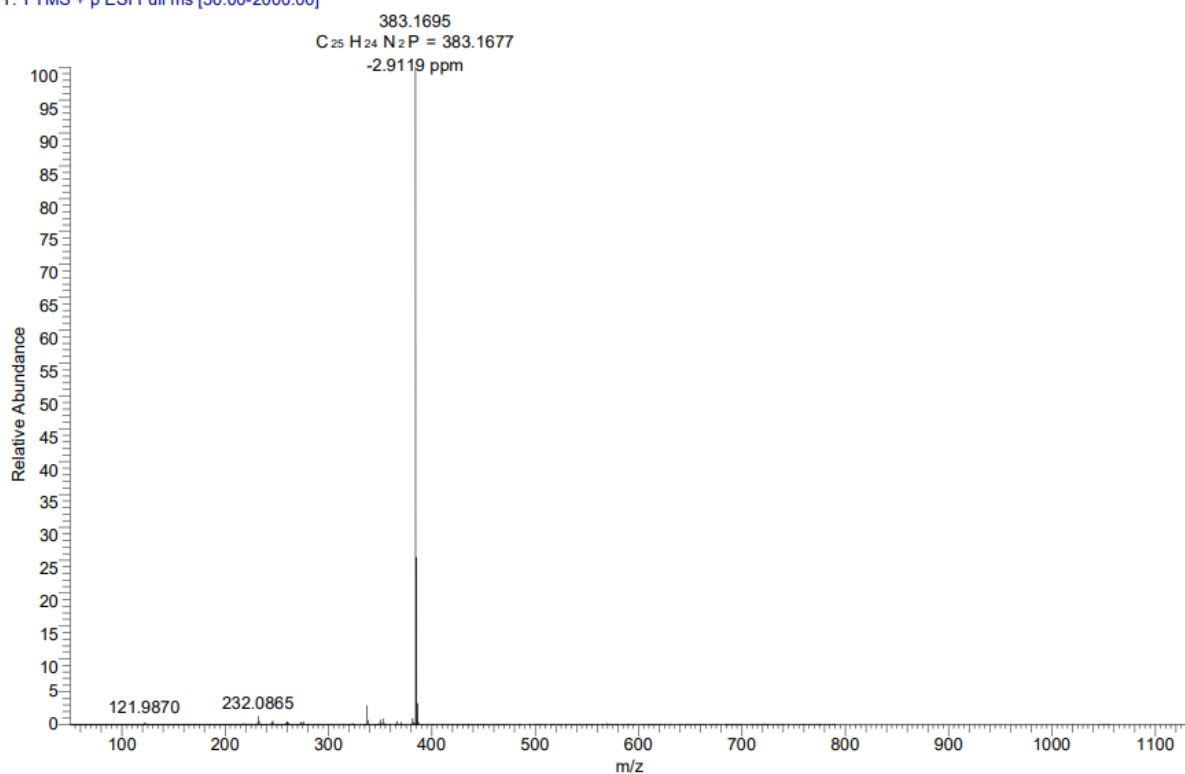

# <sup>1</sup>H NMR

(400 MHz, (CD<sub>3</sub>)<sub>2</sub>SO)

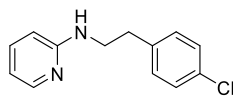

***N*-(4-Chlorophenethyl)pyridin-2-amine (3d)**

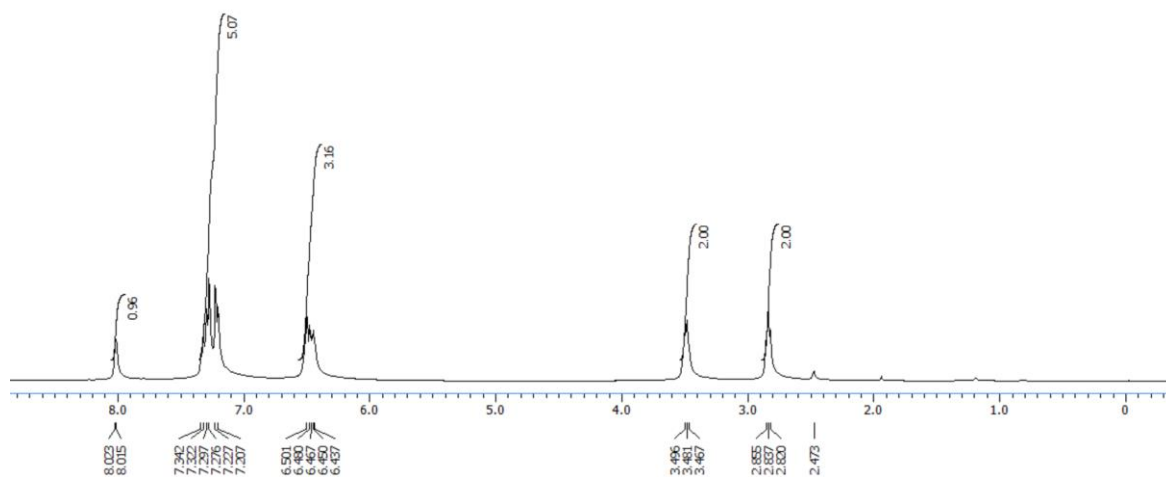

# <sup>13</sup>C NMR

(100 MHz, (CD<sub>3</sub>)<sub>2</sub>SO)

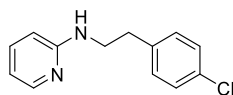

***N*-(4-Chlorophenethyl)pyridin-2-amine (3d)**

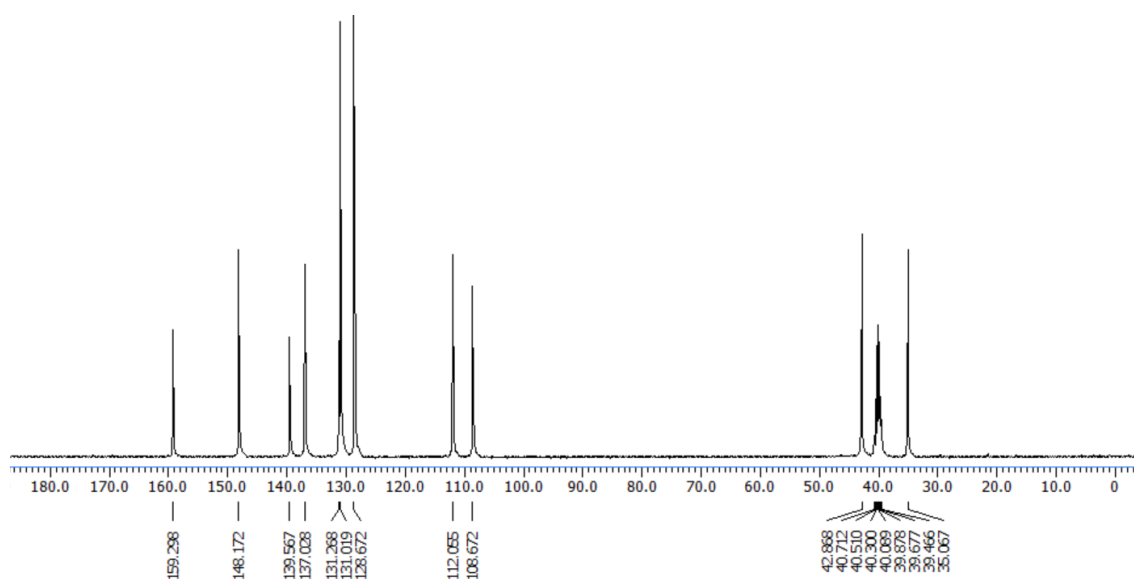

# HRMS

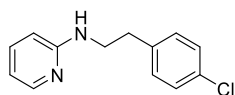

***N*-(4-Chlorophenethyl)pyridin-2-amine (3d)**

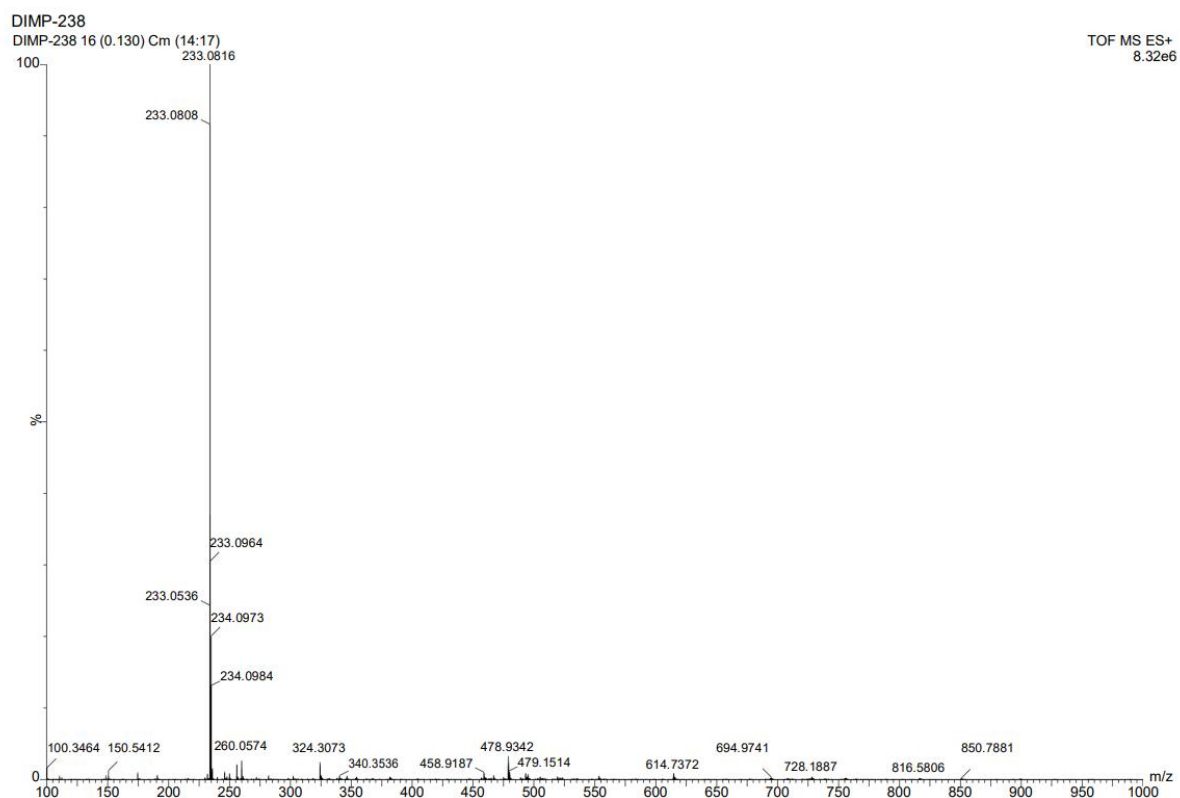

# <sup>1</sup>H NMR

(400 MHz, (CD<sub>3</sub>)<sub>2</sub>SO)

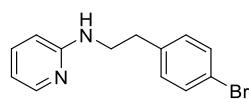

***N*-(4-Bromophenethyl)pyridin-2-amine (3e)**

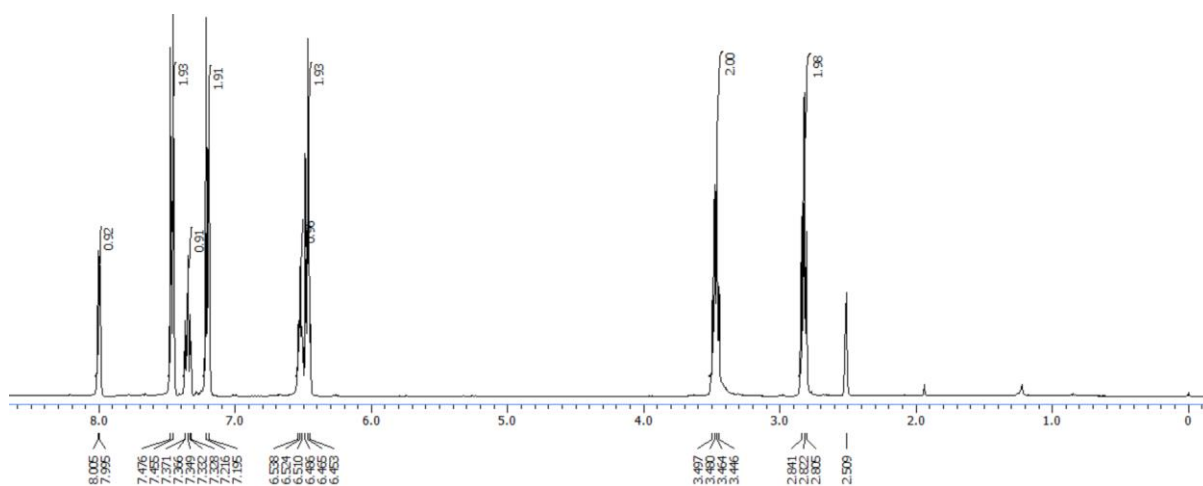

# <sup>13</sup>C NMR

(100 MHz, (CD<sub>3</sub>)<sub>2</sub>SO)

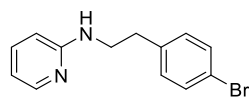

***N*-(4-Bromophenethyl)pyridin-2-amine (3e)**

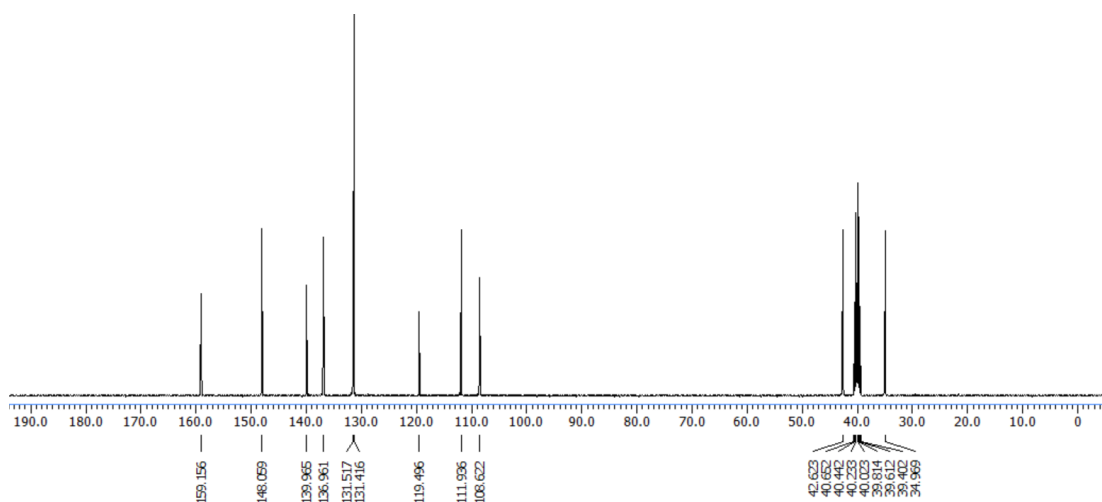

## HRMS

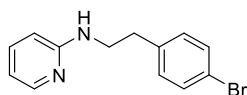

### *N*-(4-Bromophenethyl)pyridin-2-amine (3e)

#### Elemental Composition Report

Page 1

##### Single Mass Analysis

Tolerance = 10.0 PPM / DBE: min = -1.5, max = 50.0

Element prediction: Off

Number of isotope peaks used for i-FIT = 3

Monoisotopic Mass, Even Electron Ions

7 formula(e) evaluated with 1 results within limits (up to 3 closest results for each mass)

Elements Used:

C: 0-13 H: 0-200 N: 0-2 Br: 0-1

DIMP-246

QMI DIVISION, CSIR-IIIM JAMMU  
Xevo G2-XS QTOF YFC2015

08-Nov-2021

11:51:57

1: TOF MS ES+  
5.77e+005

081121\_04 71 (1.395) Cm (71:72)

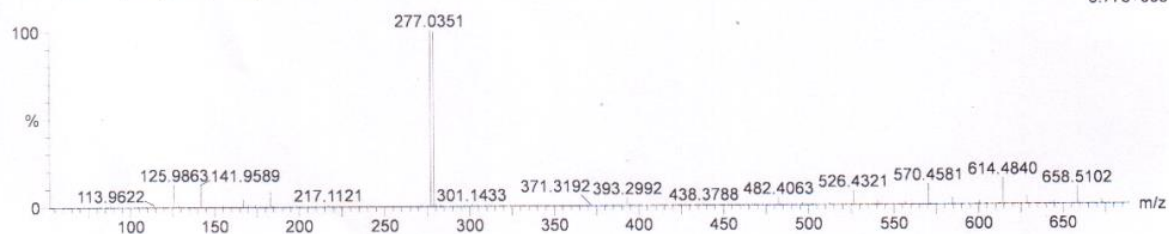

Minimum: -1.5  
Maximum: 2.0 10.0 50.0

| Mass     | Calc. Mass | mDa | PPM | DBE | i-FIT | Norm | Conf(%) | Formula       |
|----------|------------|-----|-----|-----|-------|------|---------|---------------|
| 277.0351 | 277.0340   | 1.1 | 4.0 | 7.5 | 35.6  | n/a  | n/a     | C13 H14 N2 Br |

# <sup>1</sup>H NMR

(400 MHz, (CD<sub>3</sub>)<sub>2</sub>SO)

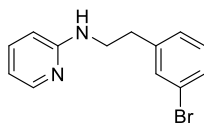

***N*-(3-Bromophenethyl)pyridin-2-amine (3f)**

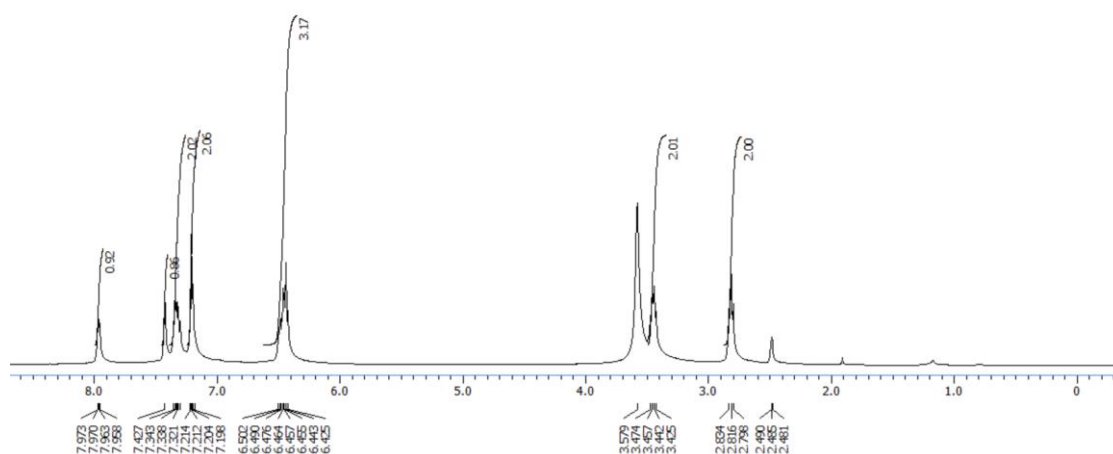

# <sup>13</sup>C NMR

(100 MHz, (CD<sub>3</sub>)<sub>2</sub>SO)

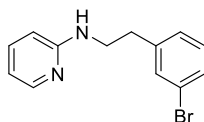

***N*-(3-Bromophenethyl)pyridin-2-amine (3f)**

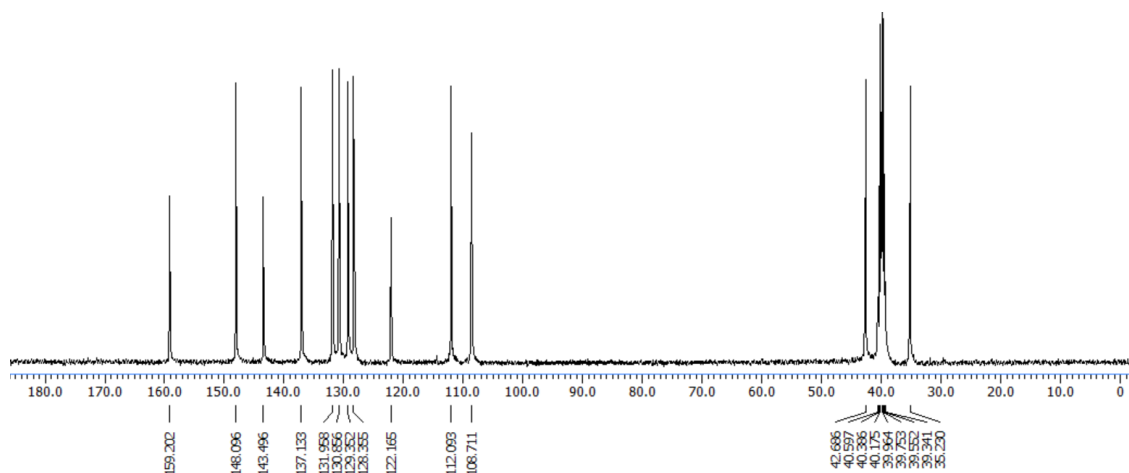



## HRMS

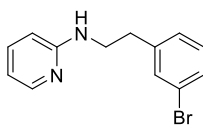

### *N*-(3-Bromophenethyl)pyridin-2-amine (3f)

#### Elemental Composition Report

Page 1

##### Single Mass Analysis

Tolerance = 10.0 PPM / DBE: min = -1.5, max = 50.0

Element prediction: Off

Number of isotope peaks used for i-FIT = 3

Monoisotopic Mass, Even Electron Ions

7 formula(e) evaluated with 1 results within limits (up to 3 closest results for each mass)

Elements Used:

C: 0-13 H: 0-200 N: 0-2 Br: 0-1

DIMP-237

QMI DIVISION, CSIR-IIIM JAMMU  
Xevo G2-XS QTOF YFC2015

08-Nov-2021

11:54:30

081121\_05 54 (1.068) Cm (54:55)

1: TOF MS ES+  
8.60e+005

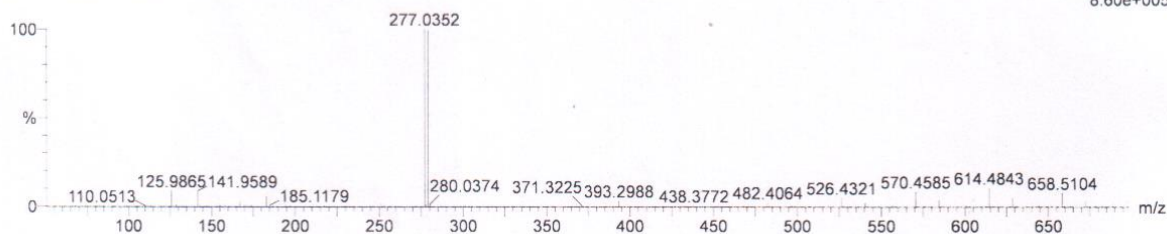

Minimum: -1.5  
Maximum: 2.0 10.0 50.0

| Mass     | Calc. Mass | mDa | PPM | DBE | i-FIT | Norm | Conf(%) | Formula       |
|----------|------------|-----|-----|-----|-------|------|---------|---------------|
| 277.0352 | 277.0340   | 1.2 | 4.3 | 7.5 | 38.5  | n/a  | n/a     | C13 H14 N2 Br |

**$^1\text{H}$  NMR**  
**(400 MHz,  $(\text{CD}_3)_2\text{SO}$ )**

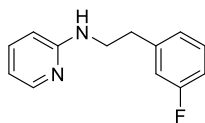

***N*-(3-Fluorophenethyl)pyridin-2-amine (3g)**

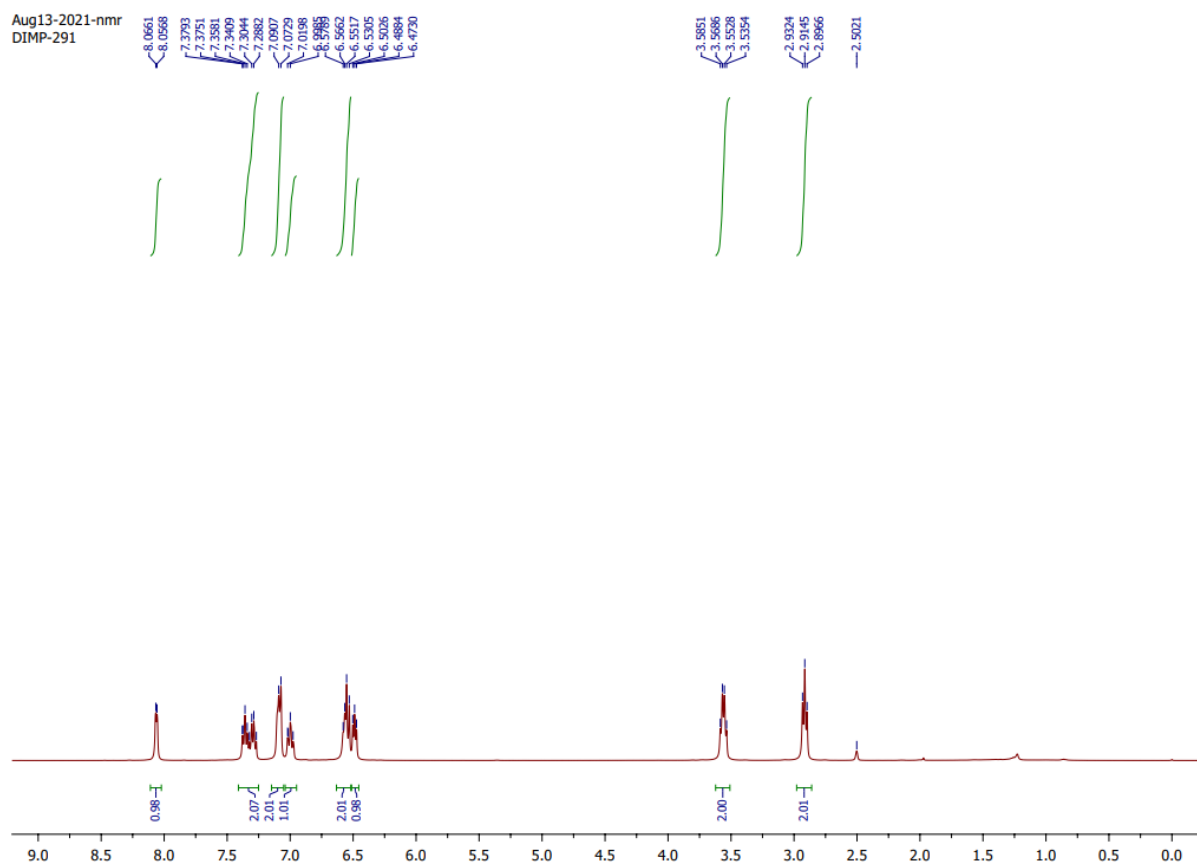

# <sup>13</sup>C NMR

(100 MHz, (CD<sub>3</sub>)<sub>2</sub>SO)

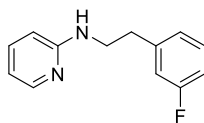

***N*-(3-Fluorophenethyl)pyridin-2-amine (3g)**

Aug13-2021-nmr  
DIMP-291

163.9977  
161.5792  
159.2593

148.1025  
143.5668  
143.4869

136.9590

130.4140  
130.3321  
125.2249  
125.1996

115.9347  
115.7204  
113.1869  
112.9798  
111.9991  
108.5773

42.6552  
40.5889  
40.3802  
40.1716  
39.9631  
39.7545  
39.5459  
39.3373  
35.3700

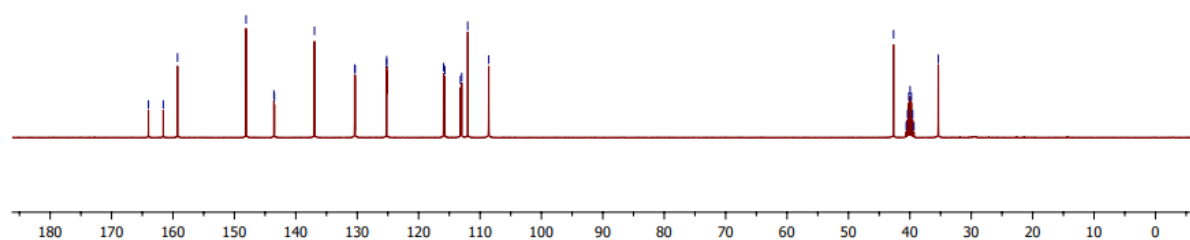

## HRMS

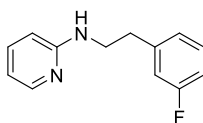

### N-(3-Fluorophenethyl)pyridin-2-amine (3g)

#### Elemental Composition Report

Page 1

##### Single Mass Analysis

Tolerance = 10.0 PPM / DBE: min = -1.5, max = 50.0

Element prediction: Off

Number of isotope peaks used for i-FIT = 3

Monoisotopic Mass, Even Electron Ions

7 formula(e) evaluated with 1 results within limits (up to 3 closest results for each mass)

Elements Used:

C: 0-13 H: 0-200 N: 0-2 F: 0-1

DIMP-291

QMI DIVISION, CSIR-IIIM JAMMU  
Xevo G2-XS QTOF YFC2015

08-Nov-2021

11:46:48

1: TOF MS ES+

1.14e+006

081121\_02 94 (1.843) Cm (94:95)

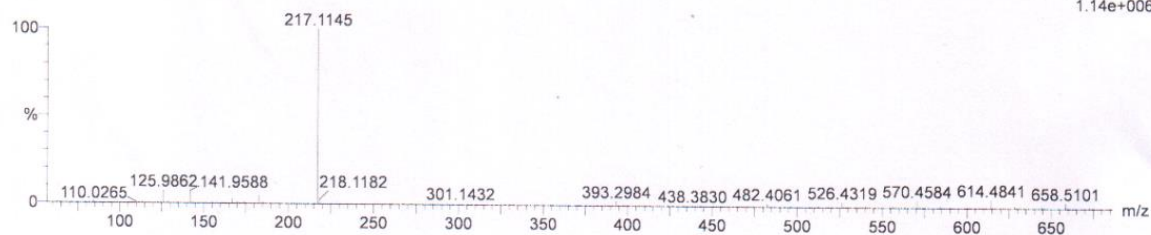

Minimum: -1.5  
Maximum: 50.0

| Mass     | Calc. Mass | mDa | PPM | DBE | i-FIT | Norm | Conf(%) | Formula      |
|----------|------------|-----|-----|-----|-------|------|---------|--------------|
| 217.1145 | 217.1141   | 0.4 | 1.8 | 7.5 | 51.6  | n/a  | n/a     | C13 H14 N2 F |

# <sup>1</sup>H NMR

(400 MHz, (CD<sub>3</sub>)<sub>2</sub>SO)

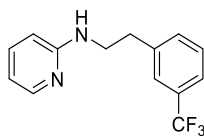

***N*-(3-(trifluoromethyl)phenethyl)pyridin-2-amine (3h)**

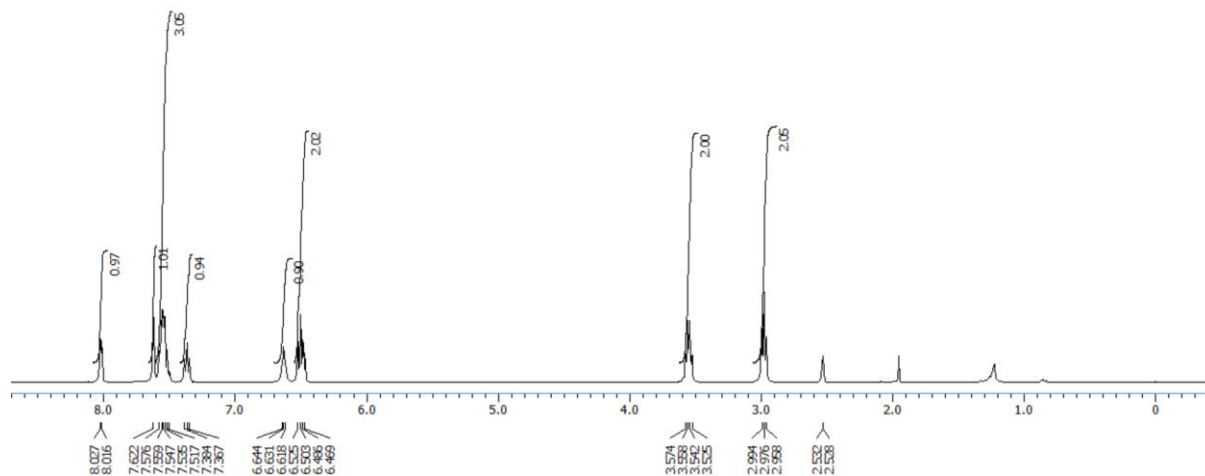

# <sup>13</sup>C NMR

(100 MHz, (CD<sub>3</sub>)<sub>2</sub>SO)

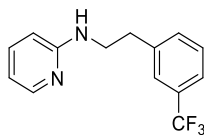

***N*-(3-(trifluoromethyl)phenethyl)pyridin-2-amine (3h)**

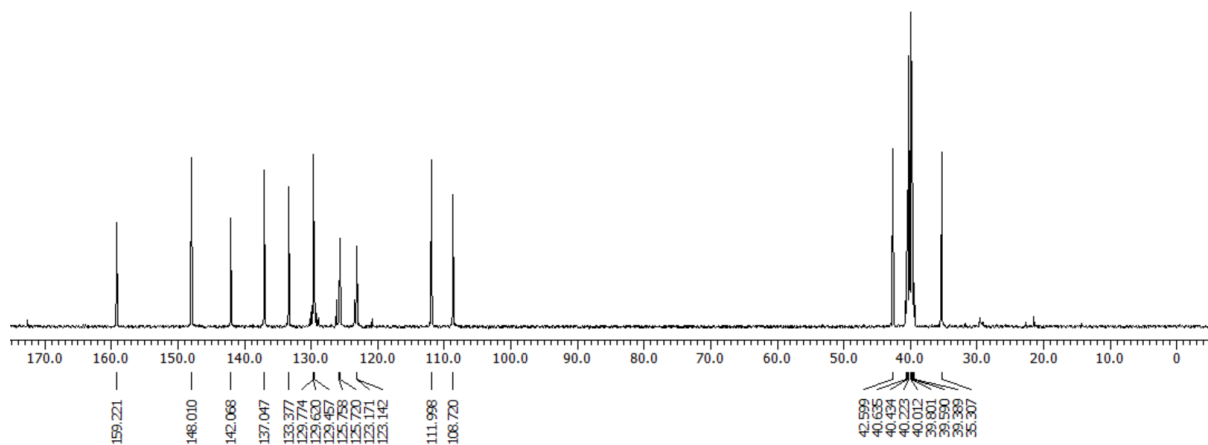

# HRMS

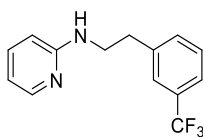

***N*-(3-(trifluoromethyl)phenethyl)pyridin-2-amine (3h)**

## Elemental Composition Report

Page 1

### Single Mass Analysis

Tolerance = 5.0 PPM / DBE: min = -1.5, max = 50.0

Element prediction: Off

Number of isotope peaks used for i-FIT = 3

Monoisotopic Mass, Even Electron Ions

13 formula(e) evaluated with 1 results within limits (up to 3 closest results for each mass)

Elements Used:

C: 0-14 H: 0-200 N: 0-2 F: 0-3

DIMP-292

QMI DIVISION, CSIR-IIIM JAMMU  
Xevo G2-XS QTOF YFC2015

08-Nov-2021

11:57:04

1: TOF MS ES+

1.10e+006

081121\_06 51 (1.017) Cm (51)

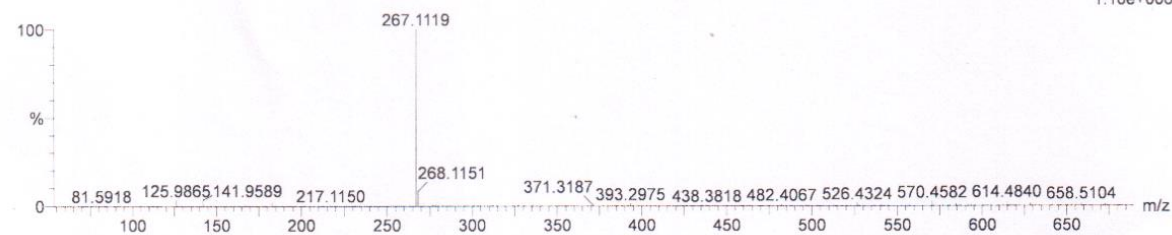

Minimum:

Maximum: 2.0 5.0 -1.5

| Mass     | Calc. Mass | mDa | PPM | DBE | i-FIT | Norm | Conf(%) | Formula       |
|----------|------------|-----|-----|-----|-------|------|---------|---------------|
| 267.1119 | 267.1109   | 1.0 | 3.7 | 7.5 | 38.9  | n/a  | n/a     | C14 H14 N2 F3 |

**$^1\text{H}$  NMR**  
**(400 MHz,  $(\text{CD}_3)_2\text{SO}$ )**

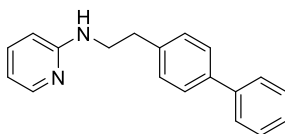

***N*-(2-([1,1'-biphenyl]-4-yl)ethyl)pyridin-2-amine (3i)**

Aug13-2021-nmr  
DIMP-285

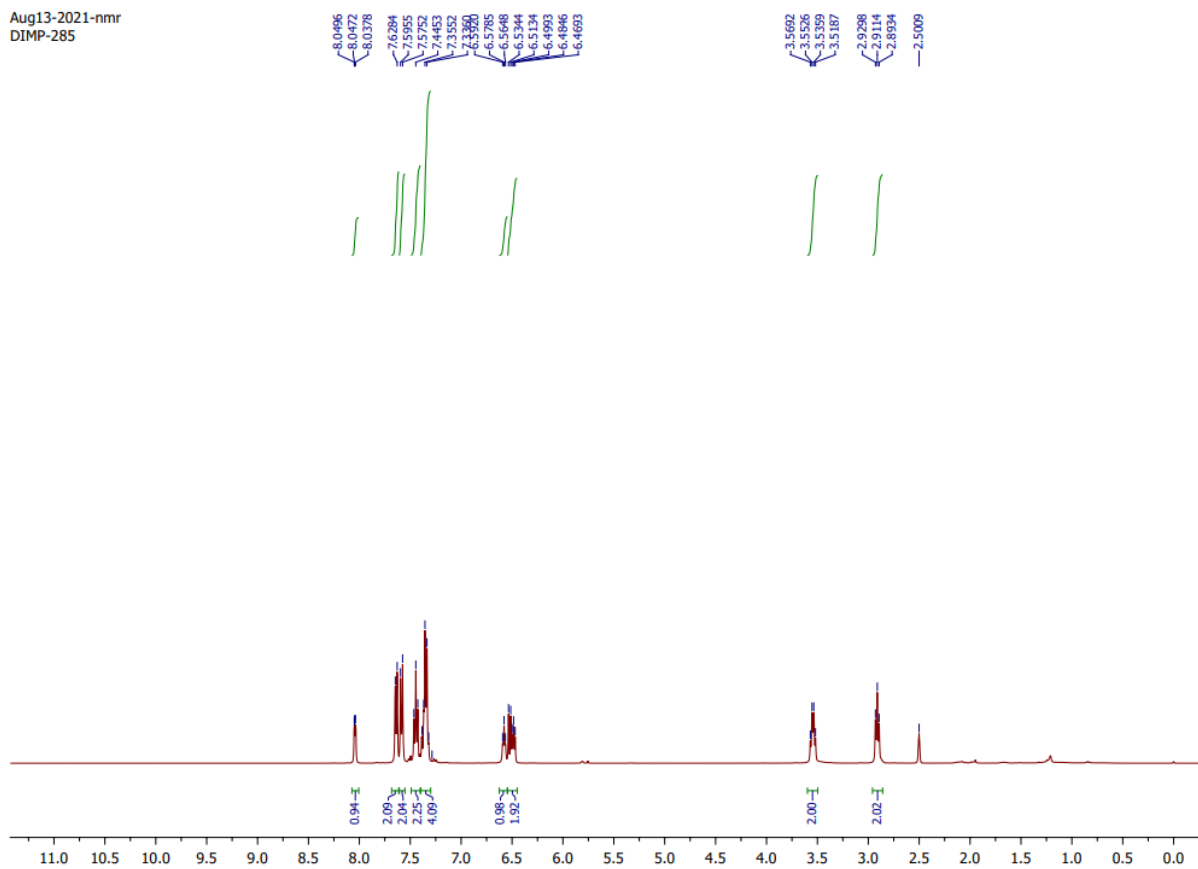

**$^{13}\text{C}$  NMR**  
**(100 MHz,  $(\text{CD}_3)_2\text{SO}$ )**

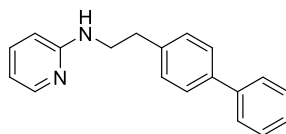

***N*-(2-([1,1'-biphenyl]-4-yl)ethyl)pyridin-2-amine (3i)**

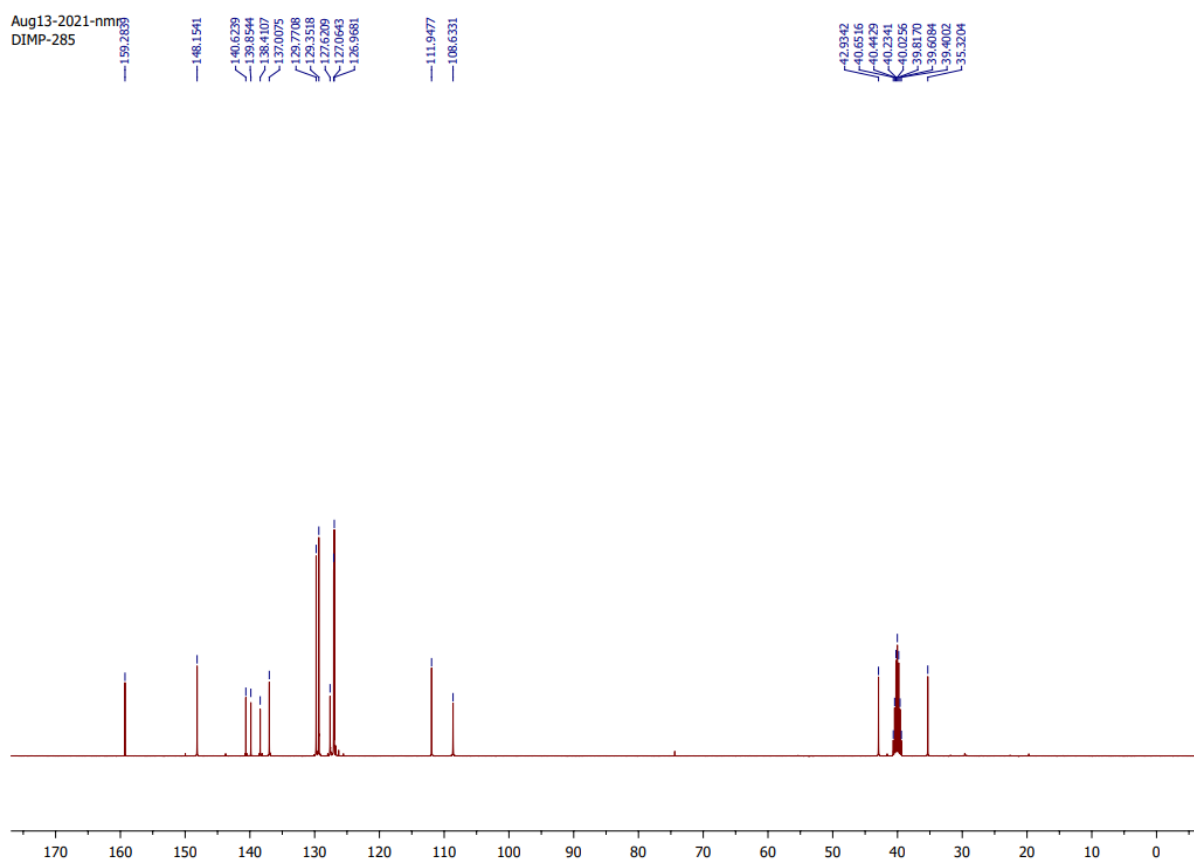



## HRMS

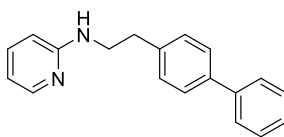

### *N*-(2-([1,1'-biphenyl]-4-yl)ethyl)pyridin-2-amine (3i)

#### Elemental Composition Report

Page 1

#### Single Mass Analysis

Tolerance = 5.0 PPM / DBE: min = -1.5, max = 50.0

Element prediction: Off

Number of isotope peaks used for i-FIT = 3

Monoisotopic Mass, Even Electron Ions

6 formula(e) evaluated with 1 results within limits (up to 3 closest results for each mass)

Elements Used:

C: 0-19 H: 0-200 N: 0-2

DIMP-285

QMI DIVISION, CSIR-IIIM JAMMU  
Xevo G2-XS QTOF YFC2015

08-Nov-2021

12:04:48

1: TOF MS ES+

1.74e+006

081121\_09 26 (0.535) Cm (26.27)

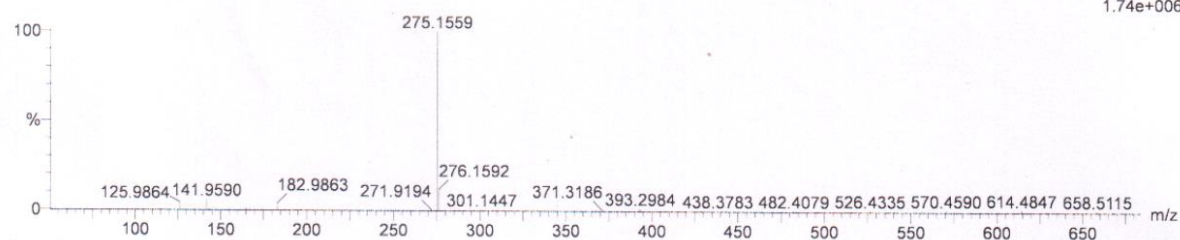

Minimum: -1.5  
Maximum: 2.0 5.0 50.0

| Mass     | Calc. Mass | mDa | PPM | DBE  | i-FIT | Norm | Conf (%) | Formula    |
|----------|------------|-----|-----|------|-------|------|----------|------------|
| 275.1559 | 275.1548   | 1.1 | 4.0 | 11.5 | 46.3  | n/a  | n/a      | C19 H19 N2 |

**$^1\text{H}$  NMR**  
**(400 MHz,  $(\text{CD}_3)_2\text{SO}$ )**

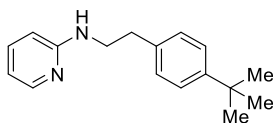

***N*-(4-(*tert*-butyl)phenethyl)pyridin-2-amine (3j)**

Aug19-2021-nmr  
DIMP-296

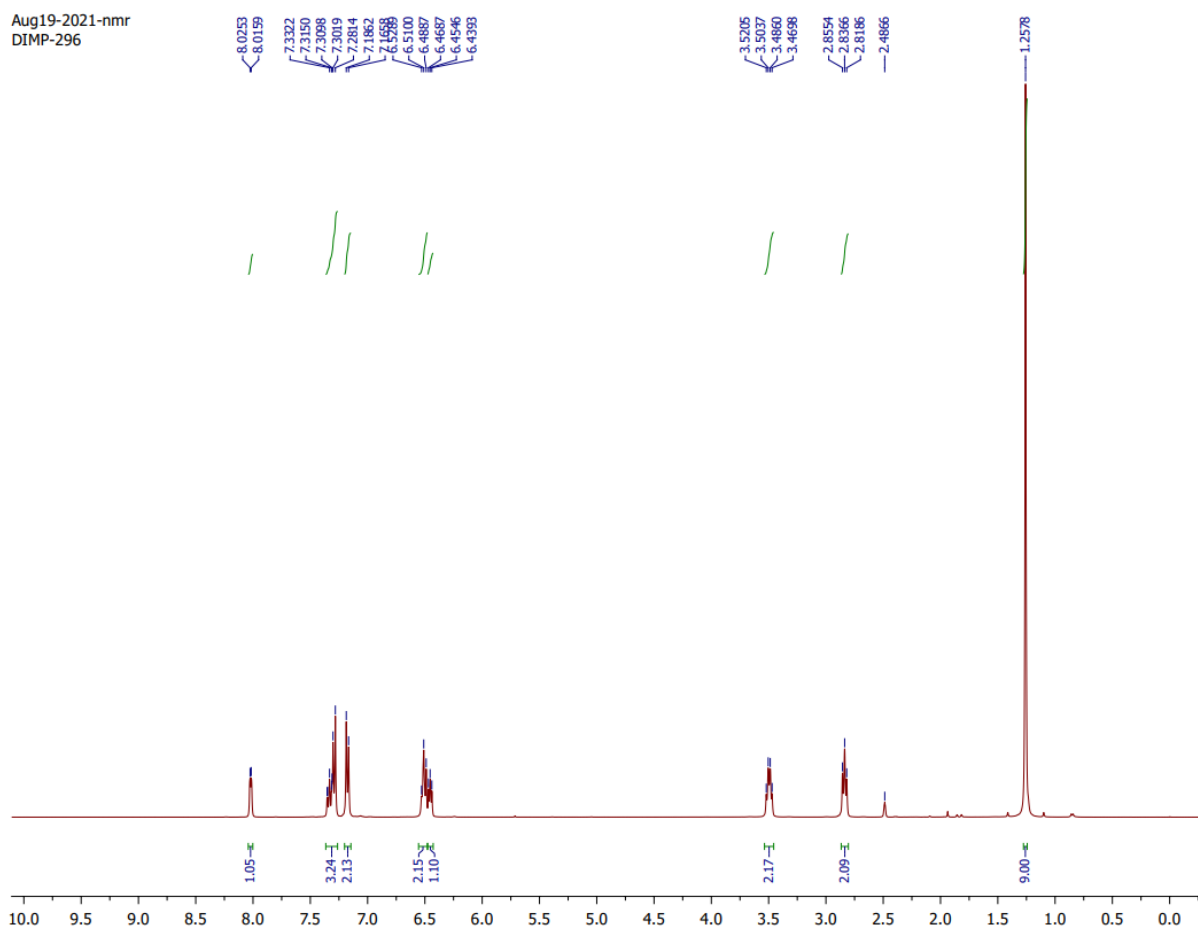

# <sup>13</sup>C NMR

(100 MHz, (CD<sub>3</sub>)<sub>2</sub>SO)

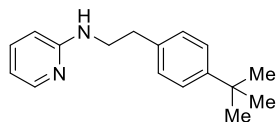

***N*-(4-(*tert*-butyl)phenethyl)pyridin-2-amine (3j)**

Aug19-2021-nmr  
DIMP-296

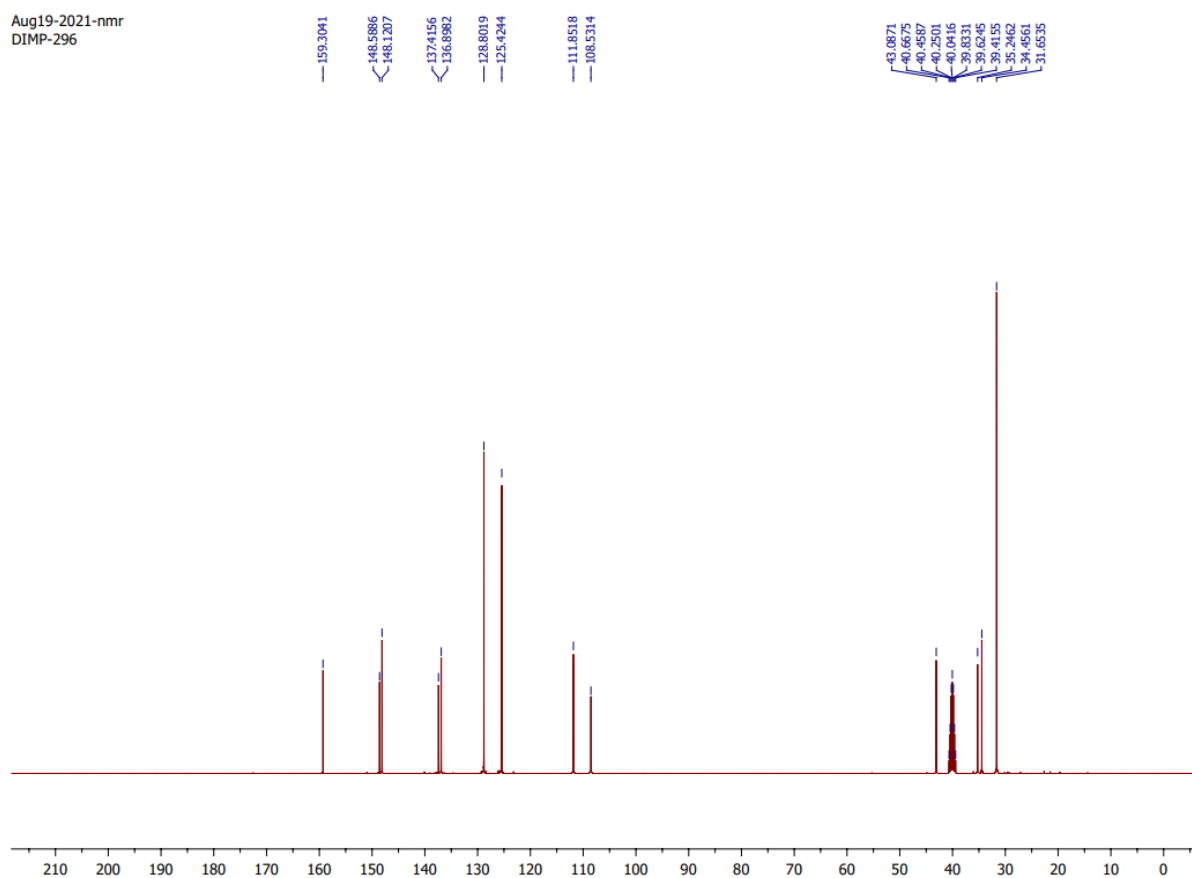

## HRMS

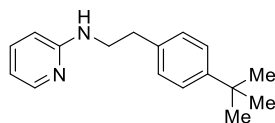

***N*-(4-(*tert*-butyl)phenethyl)pyridin-2-amine (3j)**

### Elemental Composition Report

Page 1

#### Single Mass Analysis

Tolerance = 5.0 PPM / DBE: min = -1.5, max = 50.0

Element prediction: Off

Number of isotope peaks used for i-FIT = 3

Monoisotopic Mass, Even Electron Ions

9 formula(e) evaluated with 1 results within limits (up to 3 closest results for each mass)

Elements Used:

C: 0-19 H: 0-200 N: 0-2

DIMP-296

QMI DIVISION, CSIR-IIIM JAMMU  
Xevo G2-XS QTOF YFC2015

081121\_10 47 (0.930) Cm (47.48)

08-Nov-2021  
12:07:31  
1: TOF MS ES+  
1.08e+006

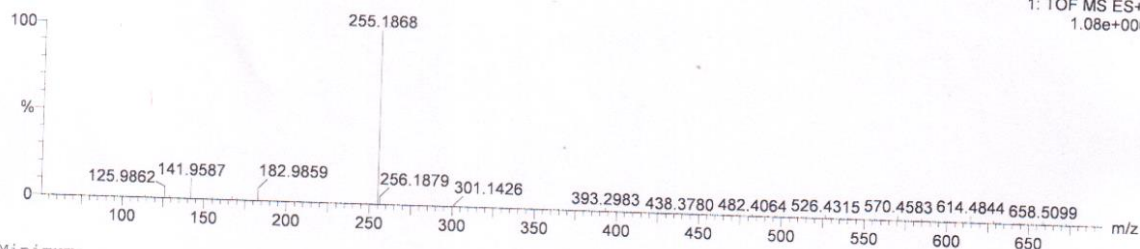

|          |            |     |     |      |       |      |         |            |  |
|----------|------------|-----|-----|------|-------|------|---------|------------|--|
| Minimum: |            |     |     |      |       |      |         |            |  |
| Maximum: |            |     |     |      |       |      |         |            |  |
|          |            | 2.0 | 5.0 | -1.5 |       |      |         |            |  |
|          |            |     |     | 50.0 |       |      |         |            |  |
| Mass     | Calc. Mass | mDa | PPM | DBE  | i-FIT | Norm | Conf(%) | Formula    |  |
| 255.1868 | 255.1861   | 0.7 | 2.7 | 7.5  | 47.2  | n/a  | n/a     | C17 H23 N2 |  |

# <sup>1</sup>H NMR

(400 MHz, (CD<sub>3</sub>)<sub>2</sub>SO)

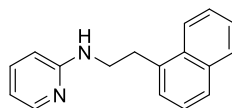

*N*-(2-(Naphthalen-1-yl)ethyl)pyridin-2-amine (3k)

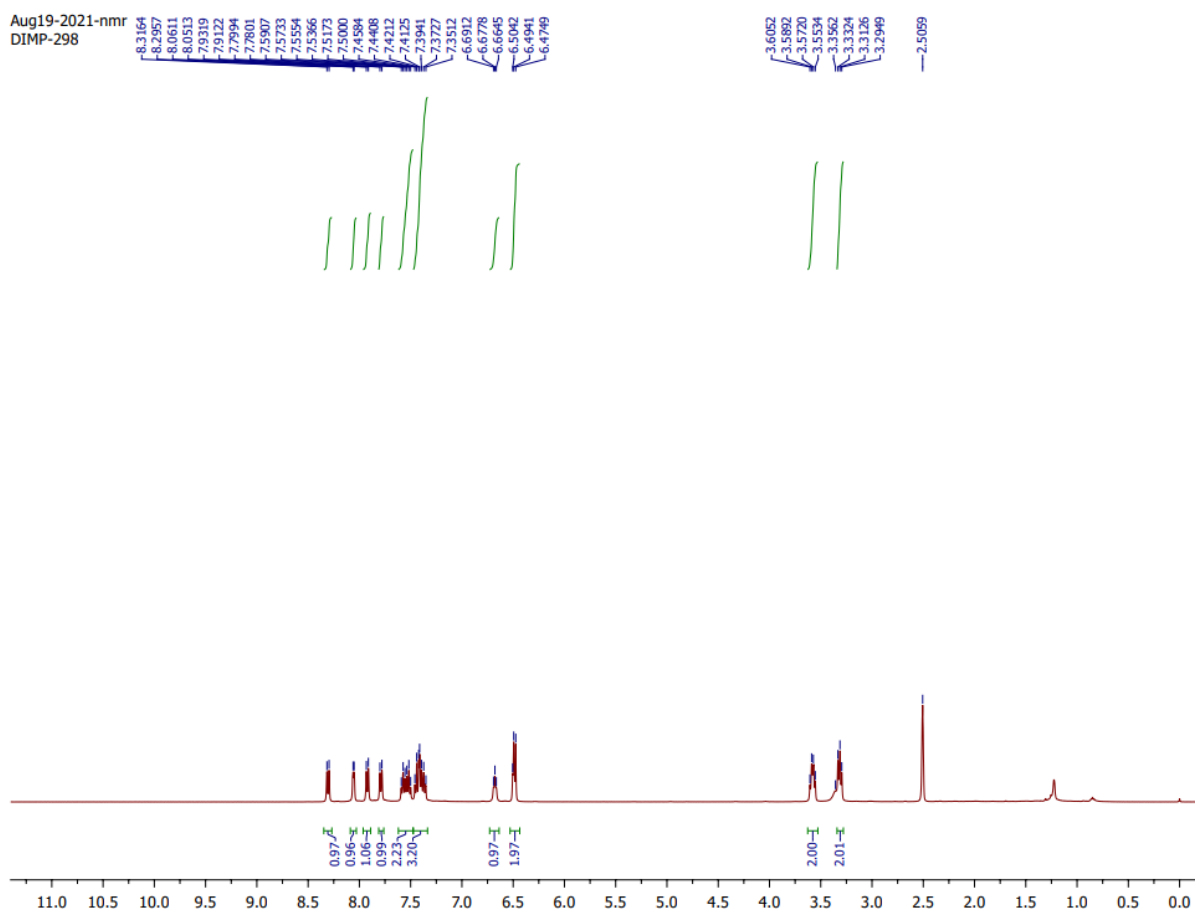

**$^{13}\text{C}$  NMR**

**(100 MHz,  $(\text{CD}_3)_2\text{SO}$ )**



***N*-(2-(Naphthalen-1-yl)ethyl)pyridin-2-amine (3k)**

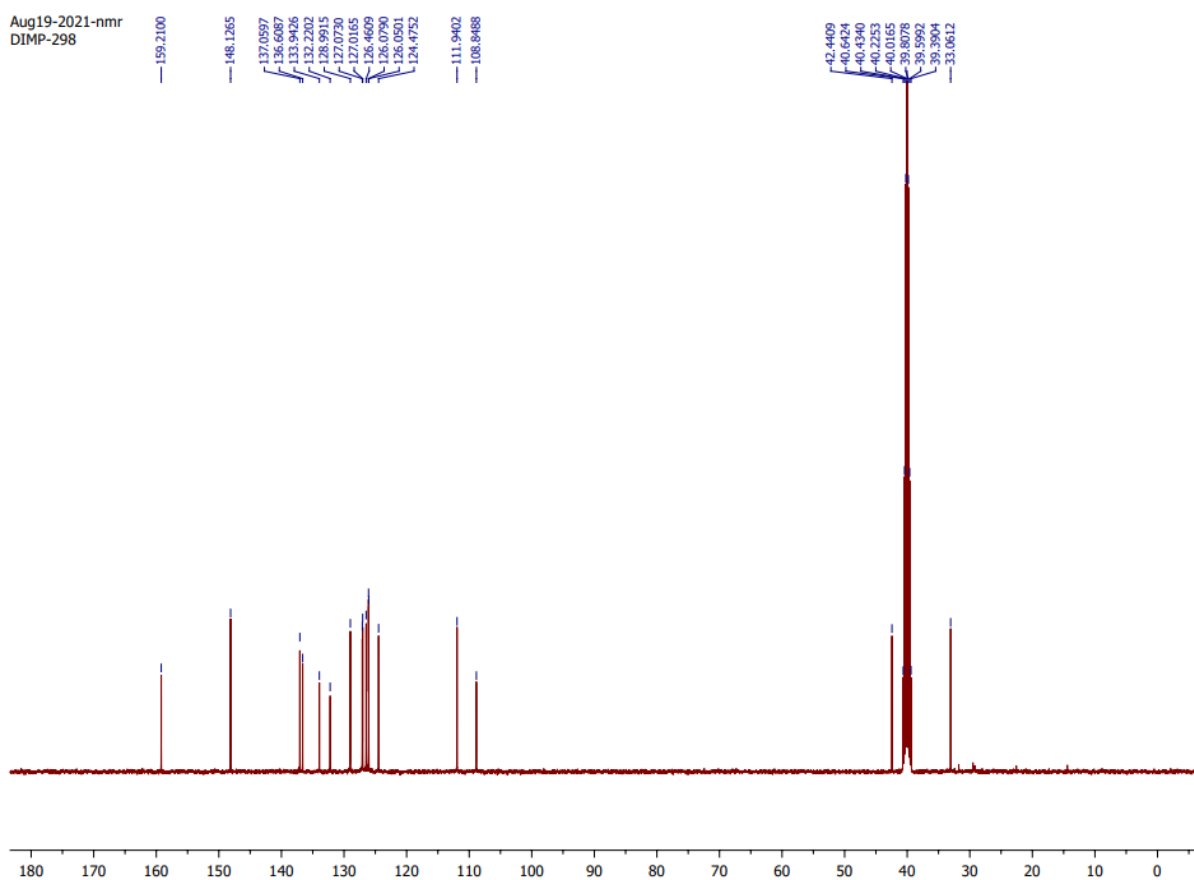

# HRMS

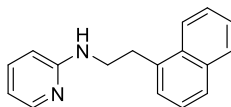

## N-(2-(Naphthalen-1-yl)ethyl)pyridin-2-amine (3k)

### Elemental Composition Report

Page 1

#### Single Mass Analysis

Tolerance = 5.0 PPM / DBE: min = -1.5, max = 50.0

Element prediction: Off

Number of isotope peaks used for i-FIT = 3

Monoisotopic Mass, Even Electron Ions

11 formula(e) evaluated with 1 results within limits (up to 3 closest results for each mass)

Elements Used:

C: 0-19 H: 0-200 N: 0-2

DIMP-298

QMI DIVISION, CSIR-IIIM JAMMU  
Xevo G2-XS QTOF YFC2015

08-Nov-2021

12:02:13

1: TOF MS ES+

1.46e+006

081121\_08 19 (0.397) Cm (19:20)

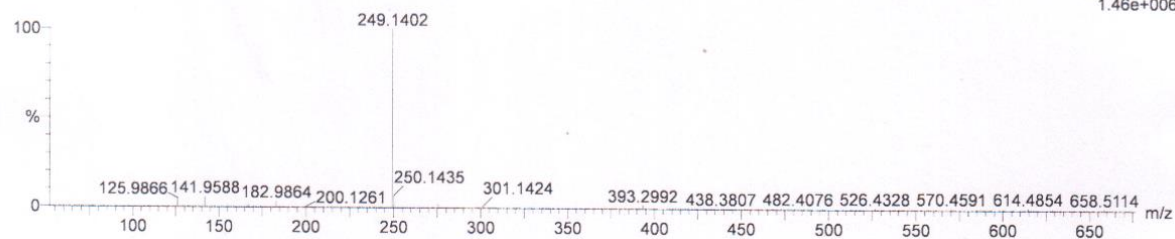

Minimum:  
Maximum:

| Mass     | Calc. Mass | mDa | PPM | DBE  | i-FIT | Norm | Conf (%) | Formula    |
|----------|------------|-----|-----|------|-------|------|----------|------------|
| 249.1402 | 249.1392   | 1.0 | 4.0 | 10.5 | 33.8  | n/a  | n/a      | C17 H17 N2 |

**$^1\text{H}$  NMR**  
**(400 MHz,  $(\text{CD}_3)_2\text{SO}$ )**

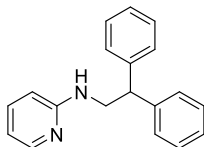

***N*-(2,2-diphenylethyl)pyridin-2-amine (3l)**

Aug31-2021-nmr  
 DIMP 301

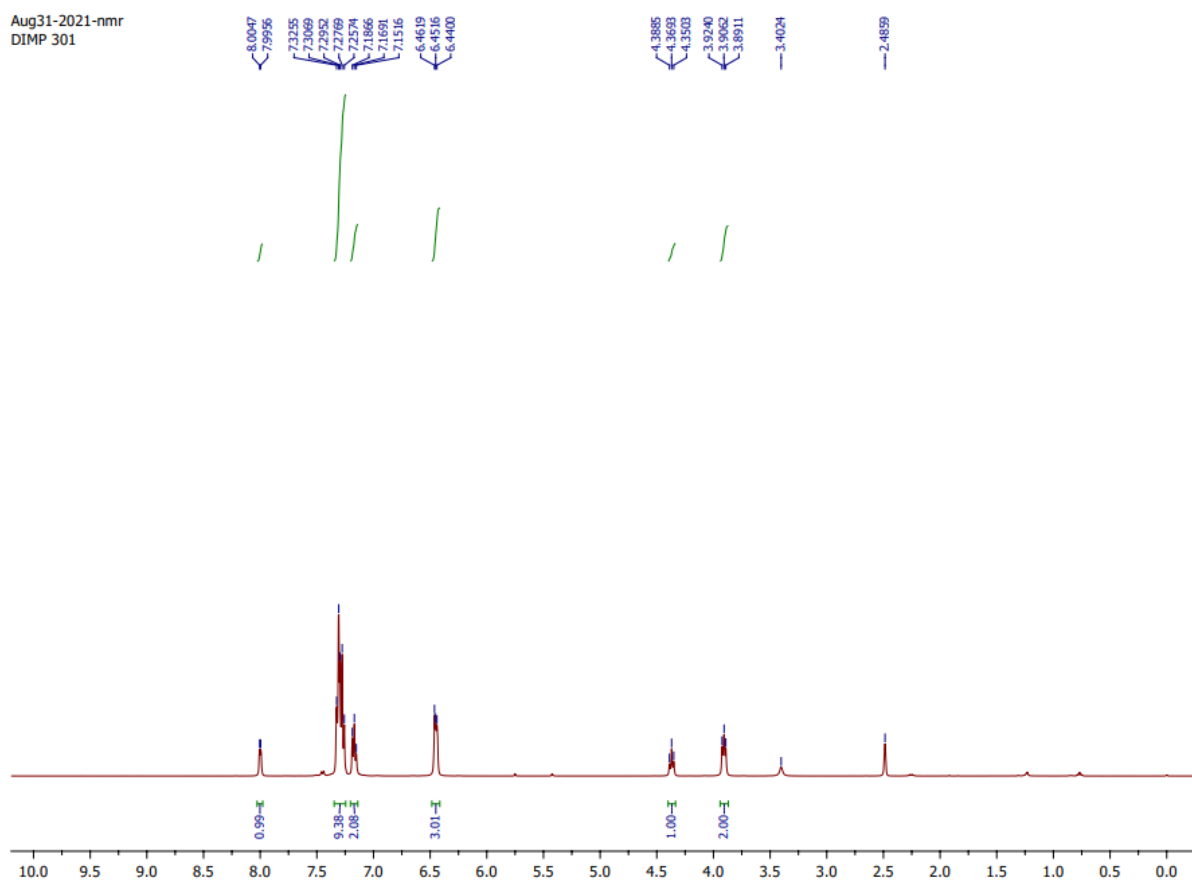



**$^{13}\text{C}$  NMR**  
**(100 MHz,  $(\text{CD}_3)_2\text{SO}$ )**



***N*-(2,2-diphenylethyl)pyridin-2-amine (3l)**

Aug31-2021-nmr  
 DIMP 301

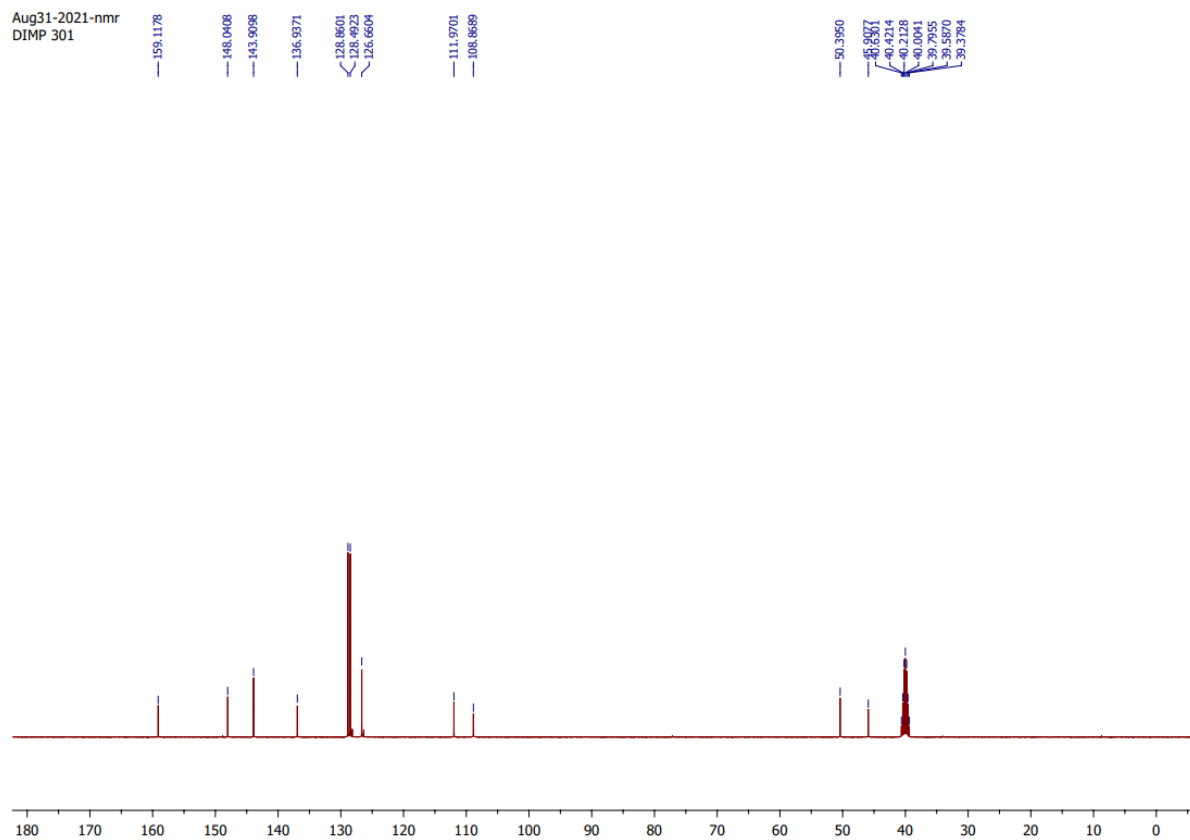

## HRMS

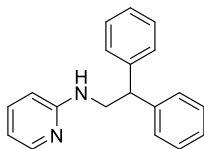

***N*-(2,2-diphenylethyl)pyridin-2-amine (3l)**

### Elemental Composition Report

Page 1

#### Single Mass Analysis

Tolerance = 10.0 PPM / DBE: min = -1.5, max = 50.0

Element prediction: Off

Number of isotope peaks used for i-FIT = 3

Monoisotopic Mass, Even Electron Ions

6 formula(e) evaluated with 1 results within limits (up to 3 closest results for each mass)

Elements Used:

C: 0-19 H: 0-200 N: 0-2

DIMP 301

QMI DIVISION, CSIR-IIIM JAMMU  
Xevo G2-XS QTOF YFC2015

16-Nov-2021

11:41:12

1: TOF MS ES+

1.95e+006

161121\_04 35 (0.707) Cm (35)

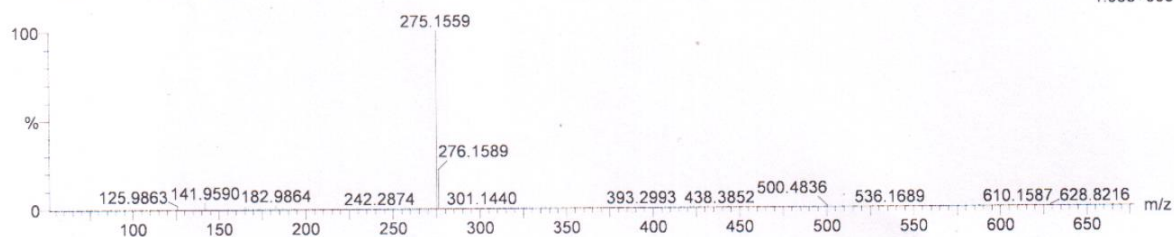

Minimum: -1.5  
Maximum: 2.0 10.0 50.0

| Mass     | Calc. Mass | mDa | PPM | DBE  | i-FIT | Norm | Conf(%) | Formula    |
|----------|------------|-----|-----|------|-------|------|---------|------------|
| 275.1559 | 275.1548   | 1.1 | 4.0 | 11.5 | 35.7  | n/a  | n/a     | C19 H19 N2 |

**<sup>1</sup>H NMR**

**(400 MHz, (CD<sub>3</sub>)<sub>2</sub>SO)**

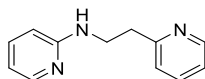

***N*-(2-(Pyridin-2-yl)ethyl)pyridin-2-amine (3m)**

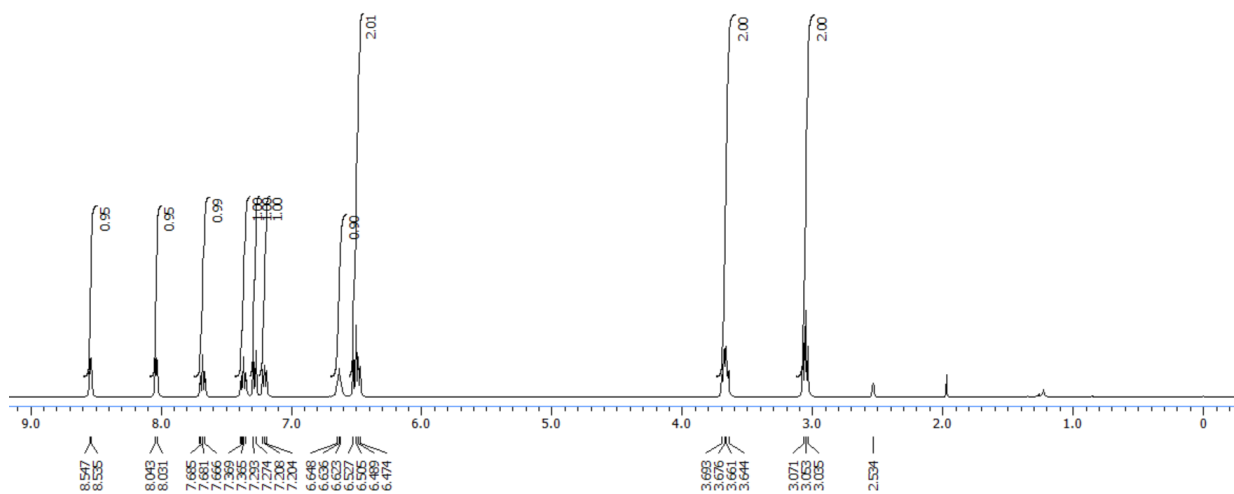

**<sup>13</sup>C NMR**

**(100 MHz, (CD<sub>3</sub>)<sub>2</sub>SO)**

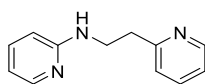

# ***N*-(2-(Pyridin-2-yl)ethyl)pyridin-2-amine (3m)**

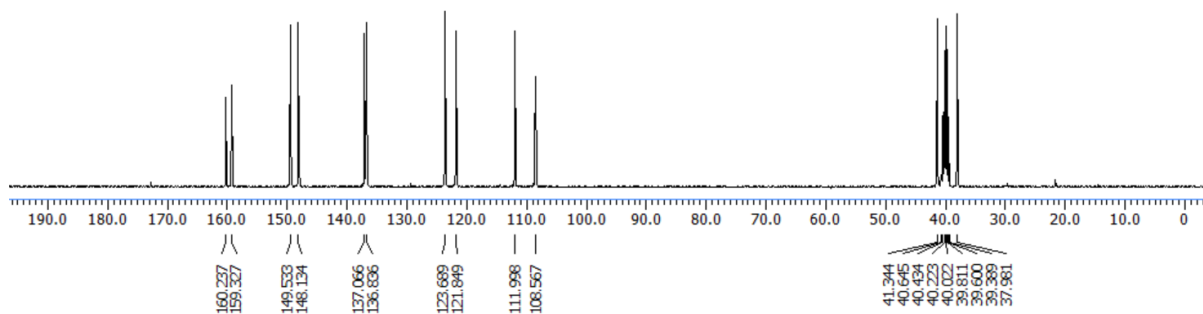

## **HRMS**

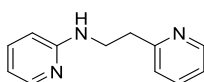

# ***N*-(2-(Pyridin-2-yl)ethyl)pyridin-2-amine (3m)**

## **Elemental Composition Report**

Page 1

### **Single Mass Analysis**

Tolerance = 5.0 PPM / DBE: min = -1.5, max = 50.0

Element prediction: Off

Number of isotope peaks used for i-FIT = 3

Monoisotopic Mass, Even Electron Ions

5 formula(e) evaluated with 1 results within limits (up to 3 closest results for each mass)

Elements Used:

C: 0-12 H: 0-200 N: 0-3

DIMP-300

QMI DIVISION, CSIR-IIIM JAMMU  
Xevo G2-XS QTOF YFC2015

08-Nov-2021

11:59:39

1: TOF MS ES+

6.73e+005

081121\_07 39 (0.775) Cm (39)

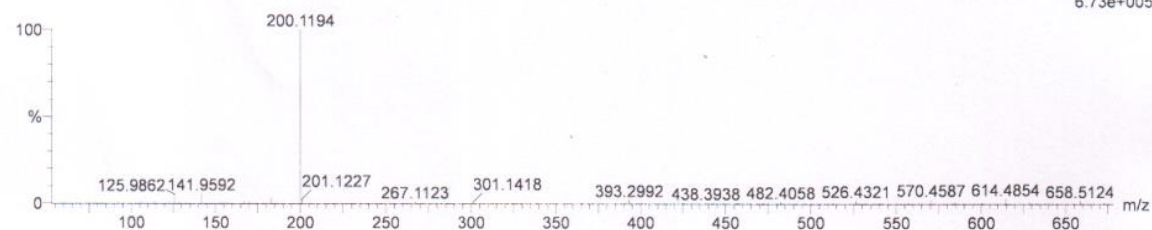

Minimum: -1.5  
Maximum: 2.0 5.0 50.0

| Mass     | Calc. Mass | mDa | PPM | DBE | i-FIT | Norm | Conf(%) | Formula    |
|----------|------------|-----|-----|-----|-------|------|---------|------------|
| 200.1194 | 200.1188   | 0.6 | 3.0 | 7.5 | 39.0  | n/a  | n/a     | C12 H14 N3 |

**$^1\text{H}$  NMR**

**(400 MHz,  $(\text{CD}_3)_2\text{SO}$ )**

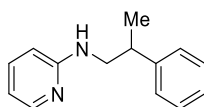

***N*-(2-Phenylpropyl)pyridin-2-amine (3n)**

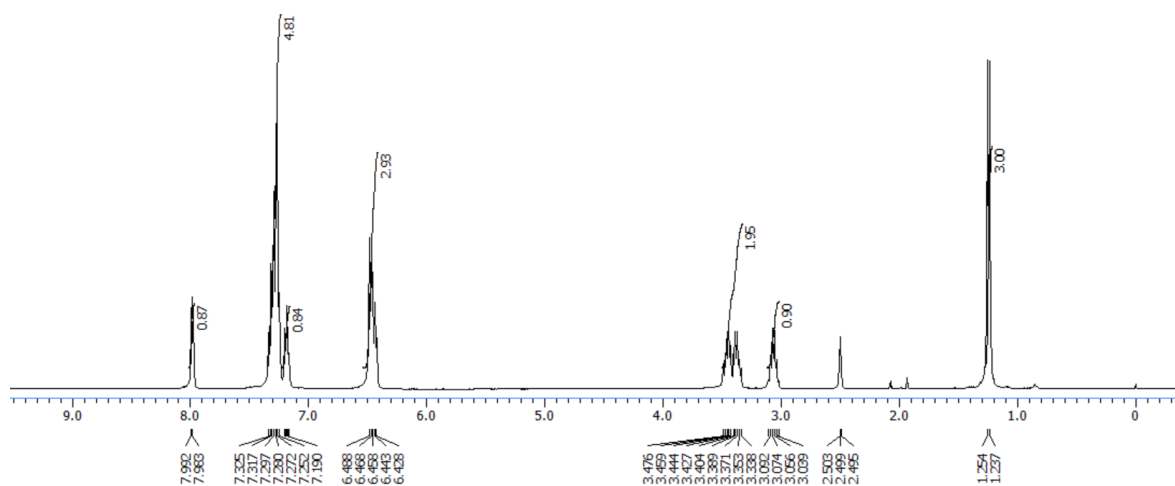

**$^{13}\text{C}$  NMR**

**(100 MHz,  $(\text{CD}_3)_2\text{SO}$ )**

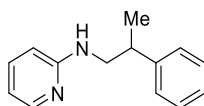

### *N*-(2-Phenylpropyl)pyridin-2-amine (3n)

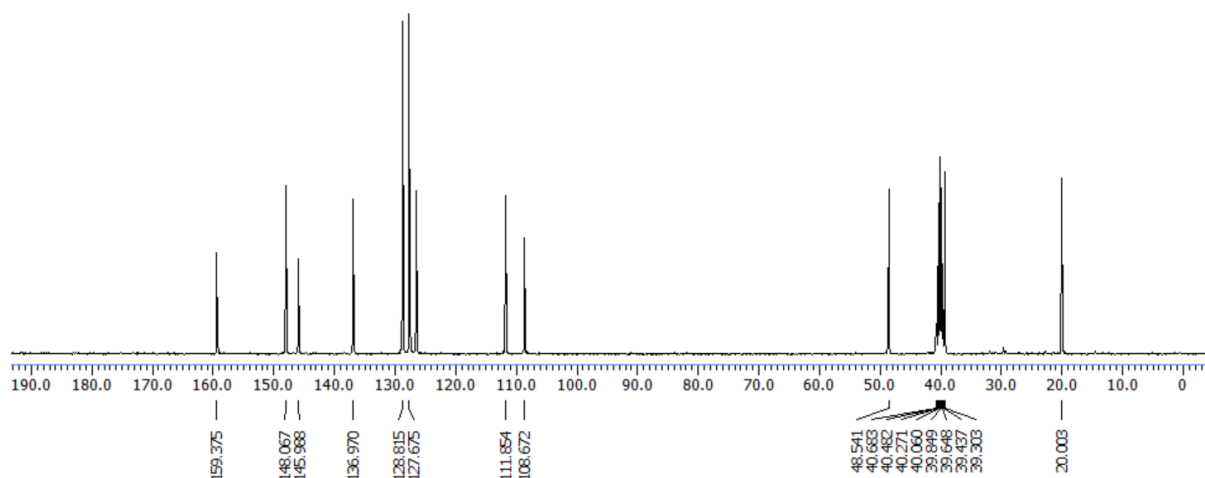

### HRMS

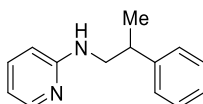

### *N*-(2-Phenylpropyl)pyridin-2-amine (3n)

#### Elemental Composition Report

Page 1

#### Single Mass Analysis

Tolerance = 10.0 PPM / DBE: min = -1.5, max = 50.0

Element prediction: Off

Number of isotope peaks used for i-FIT = 3

Monoisotopic Mass, Even Electron Ions

4 formula(e) evaluated with 1 results within limits (up to 3 closest results for each mass)

Elements Used:

C: 0-14 H: 0-200 N: 0-2

DIMP 302

QMI DIVISION, CSIR-IIIM JAMMU  
Xevo G2-XS QTOF YFC2015

16-Nov-2021

11:35:48

1: TOF MS ES+

1.49e+006

161121\_02 35 (0.707) Cm (35:36)

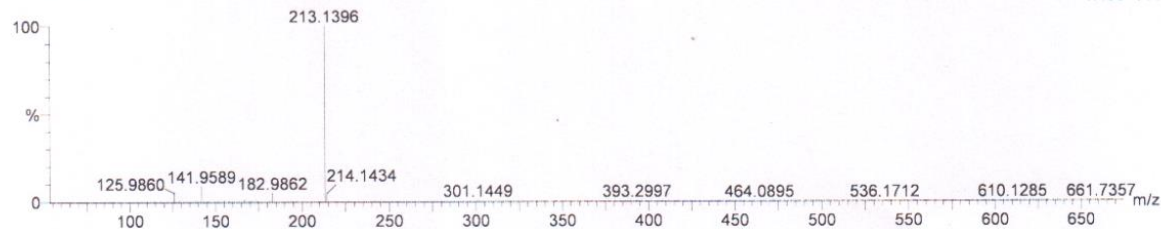

Minimum: -1.5  
Maximum: 2.0 10.0 50.0

| Mass     | Calc. Mass | mDa | PPM | DBE | i-FIT | Norm | Conf(%) | Formula    |
|----------|------------|-----|-----|-----|-------|------|---------|------------|
| 213.1396 | 213.1392   | 0.4 | 1.9 | 7.5 | 48.4  | n/a  | n/a     | C14 H17 N2 |

**$^1\text{H}$  NMR**  
**(400 MHz,  $(\text{CD}_3)_2\text{SO}$ )**

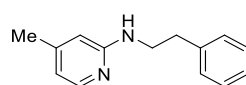

**4-Methyl-*N*-phenethylpyridin-2-amine (4a)**

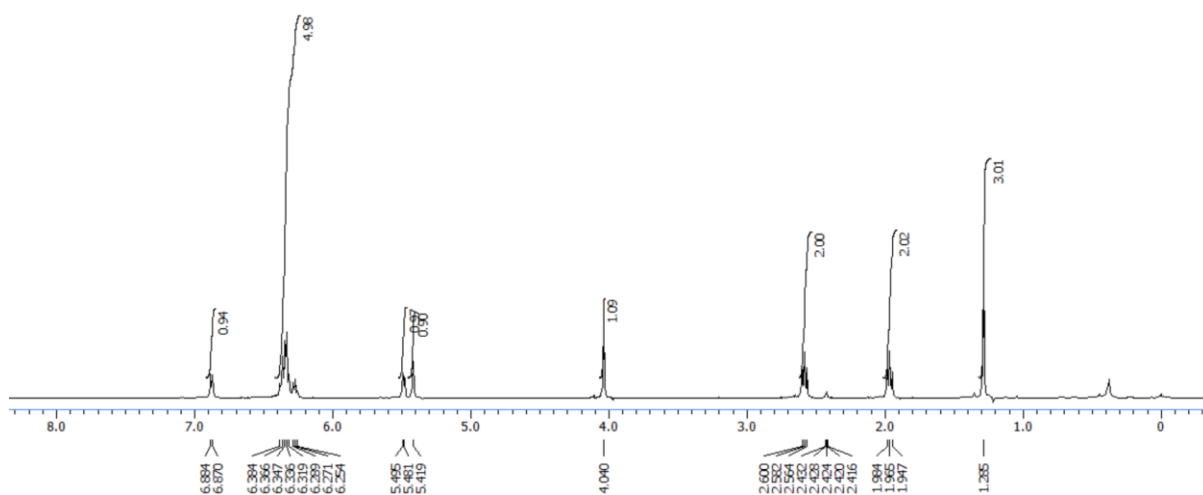

**$^{13}\text{C}$  NMR**  
**(100 MHz,  $(\text{CD}_3)_2\text{SO}$ )**

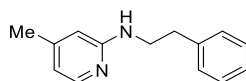

**4-Methyl-N-phenethylpyridin-2-amine (4a)**

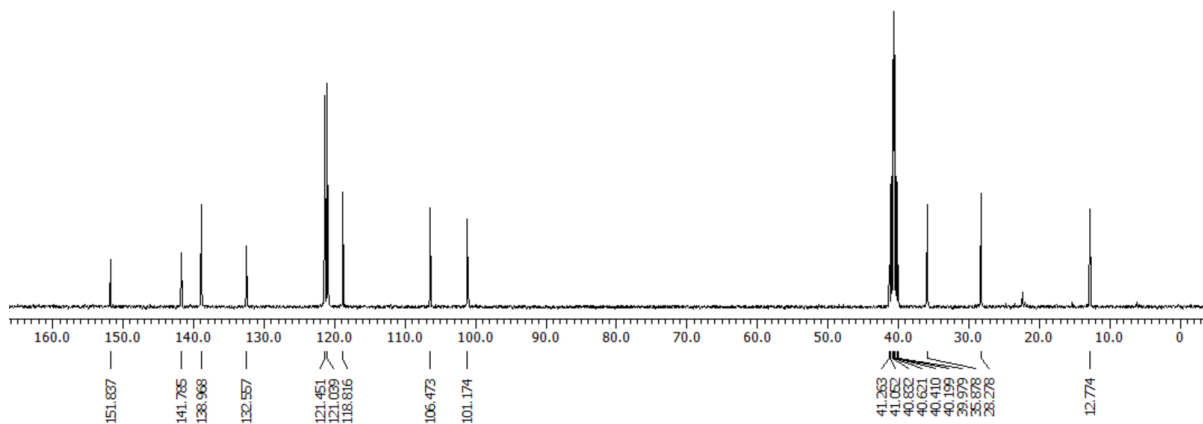

### HRMS

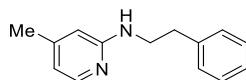

**4-Methyl-N-phenethylpyridin-2-amine (4a)**

### Elemental Composition Report

Page 1

#### Single Mass Analysis

Tolerance = 10.0 PPM / DBE: min = -1.5, max = 50.0

Element prediction: Off

Number of isotope peaks used for i-FIT = 3

Monoisotopic Mass, Even Electron Ions

9 formula(e) evaluated with 1 results within limits (up to 3 closest results for each mass)

Elements Used:

C: 0-19 H: 0-200 N: 0-2

DIMP 306

QMI DIVISION, CSIR-IIIM JAMMU  
Xevo G2-XS QTOF YFC2015

16-Nov-2021

11:43:54

1: TOF MS ES+

9.39e+005

161121\_05 22 (0.448) Cm (22)

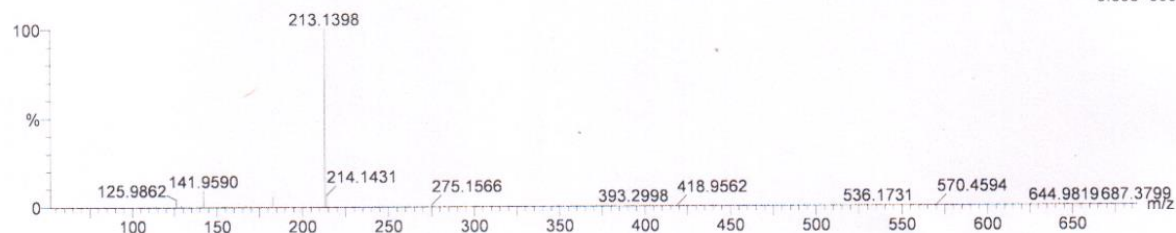

Minimum: -1.5  
Maximum: 2.0 10.0 50.0

| Mass     | Calc. Mass | mDa | PPM | DBE | i-FIT | Norm | Conf(%) | Formula                                        |
|----------|------------|-----|-----|-----|-------|------|---------|------------------------------------------------|
| 213.1398 | 213.1392   | 0.6 | 2.8 | 7.5 | 46.1  | n/a  | n/a     | C <sub>14</sub> H <sub>17</sub> N <sub>2</sub> |



**<sup>1</sup>H NMR**

**(400 MHz, (CD<sub>3</sub>)<sub>2</sub>SO)**

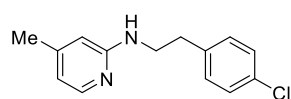

***N*-(4-Chlorophenethyl)-4-methylpyridin-2-amine (4b)**

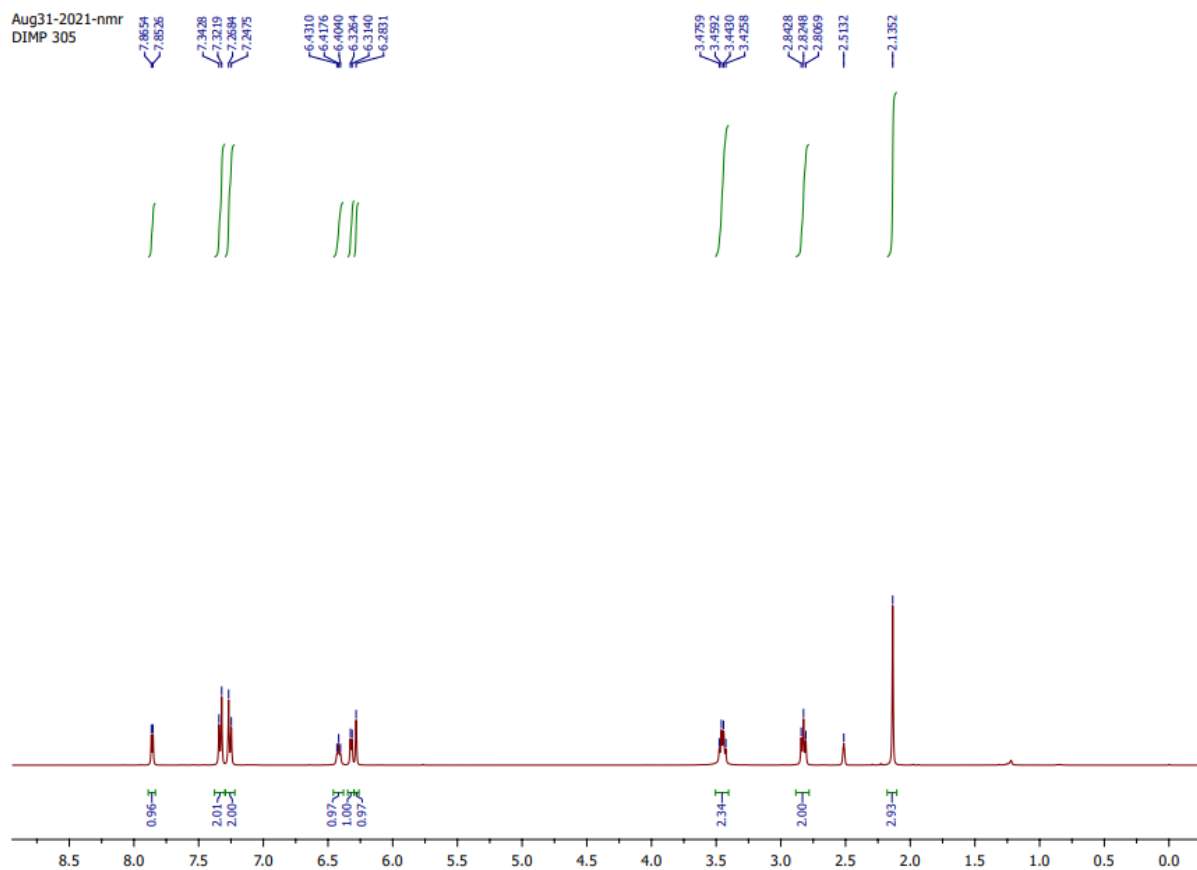

### <sup>13</sup>C NMR

(100 MHz, (CD<sub>3</sub>)<sub>2</sub>SO)

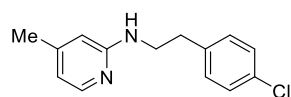

**N-(4-Chlorophenethyl)-4-methylpyridin-2-amine (4b)**

Aug31-2021-nmr  
DIMP 305

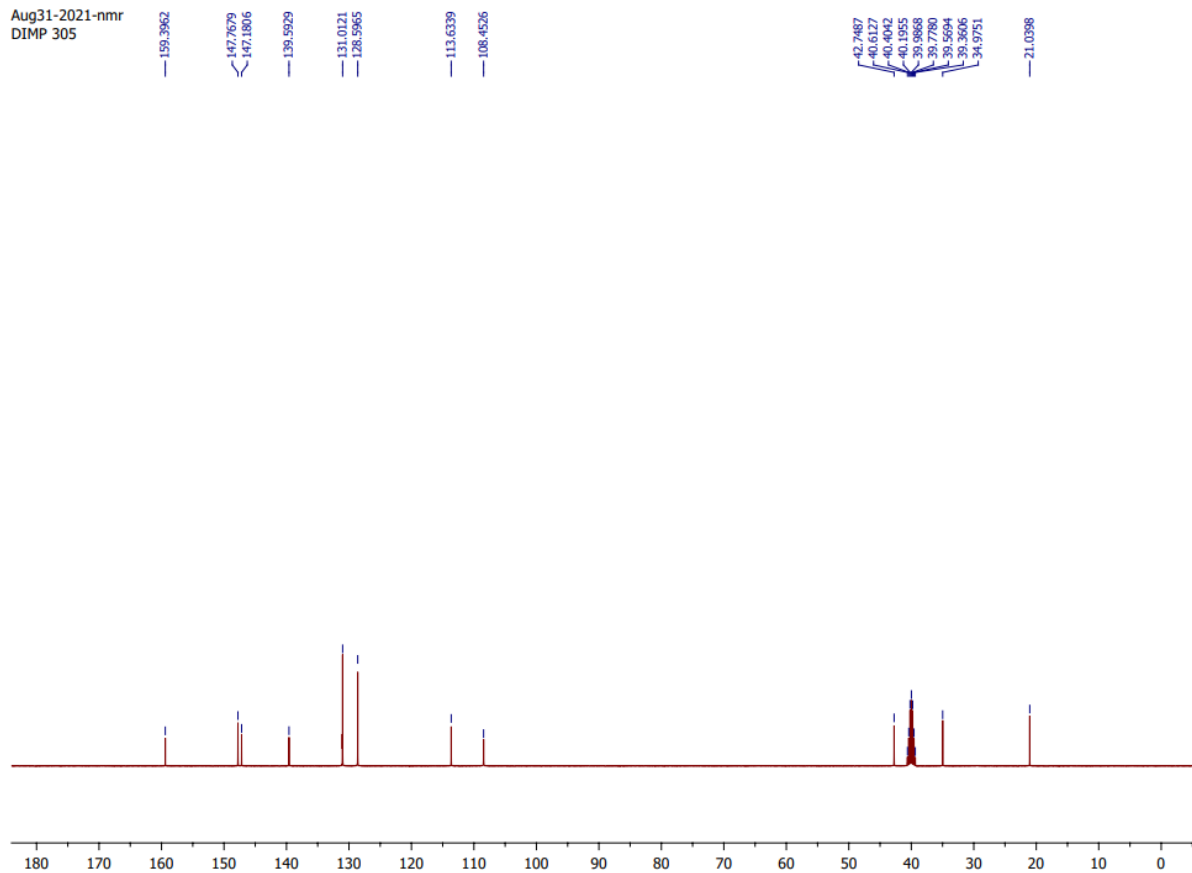

## HRMS

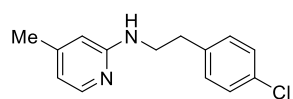

**N-(4-Chlorophenethyl)-4-methylpyridin-2-amine (4b)**

## Elemental Composition Report

Page 1

### Single Mass Analysis

Tolerance = 10.0 PPM / DBE: min = -1.5, max = 50.0

Element prediction: Off

Number of isotope peaks used for i-FIT = 3

Monoisotopic Mass, Even Electron Ions

7 formula(e) evaluated with 1 results within limits (up to 3 closest results for each mass)

Elements Used:

C: 0-14 H: 0-200 N: 0-2 Cl: 0-1

DIMP 305

QMI DIVISION, CSIR-IIIM JAMMU  
Xevo G2-XS QTOF YFC2015

16-Nov-2021

11:38:29

1: TOF MS ES+

1.07e+006

161121\_03 7 (0.155) Cm (7)

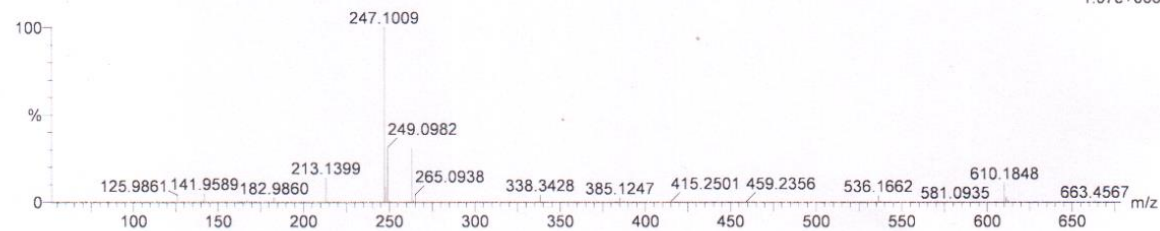

Minimum: -1.5  
Maximum: 2.0 10.0 50.0

| Mass     | Calc. Mass | mDa | PPM | DBE | i-FIT | Norm | Conf(%) | Formula       |
|----------|------------|-----|-----|-----|-------|------|---------|---------------|
| 247.1009 | 247.1002   | 0.7 | 2.8 | 7.5 | 27.5  | n/a  | n/a     | C14 H16 N2 Cl |

## <sup>1</sup>H NMR

(400 MHz, (CD<sub>3</sub>)<sub>2</sub>SO)

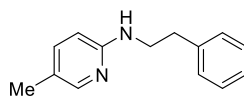

# 5-Methyl-N-phenethylpyridin-2-amine (4c)

Oct09-2021-nmr  
DIMP 336

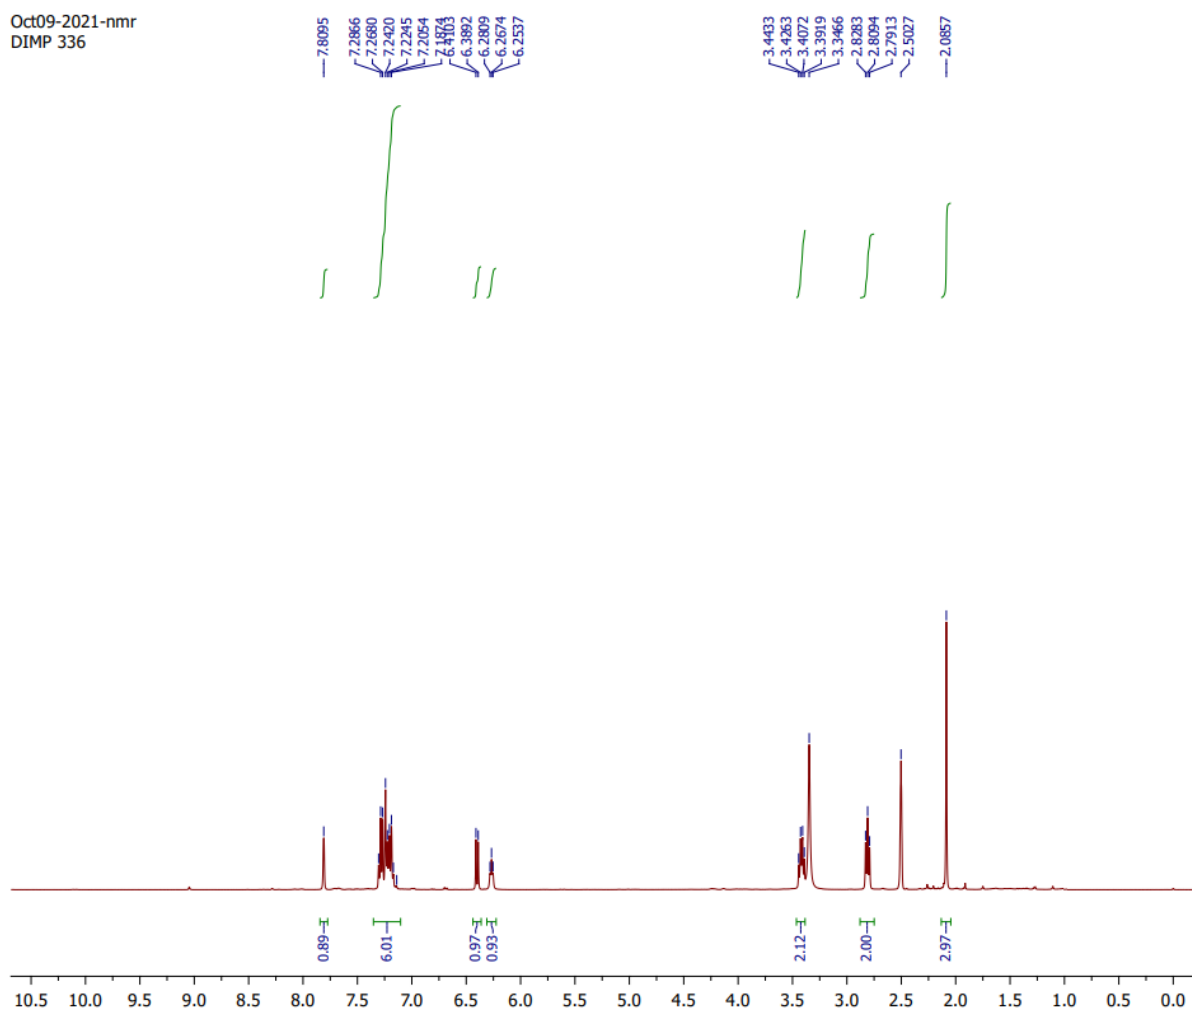

## <sup>13</sup>C NMR

(100 MHz, (CD<sub>3</sub>)<sub>2</sub>SO)

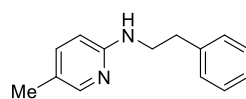

## 5-Methyl-*N*-phenethylpyridin-2-amine (4c)

Oct09-2021-nmr  
DIMP 336

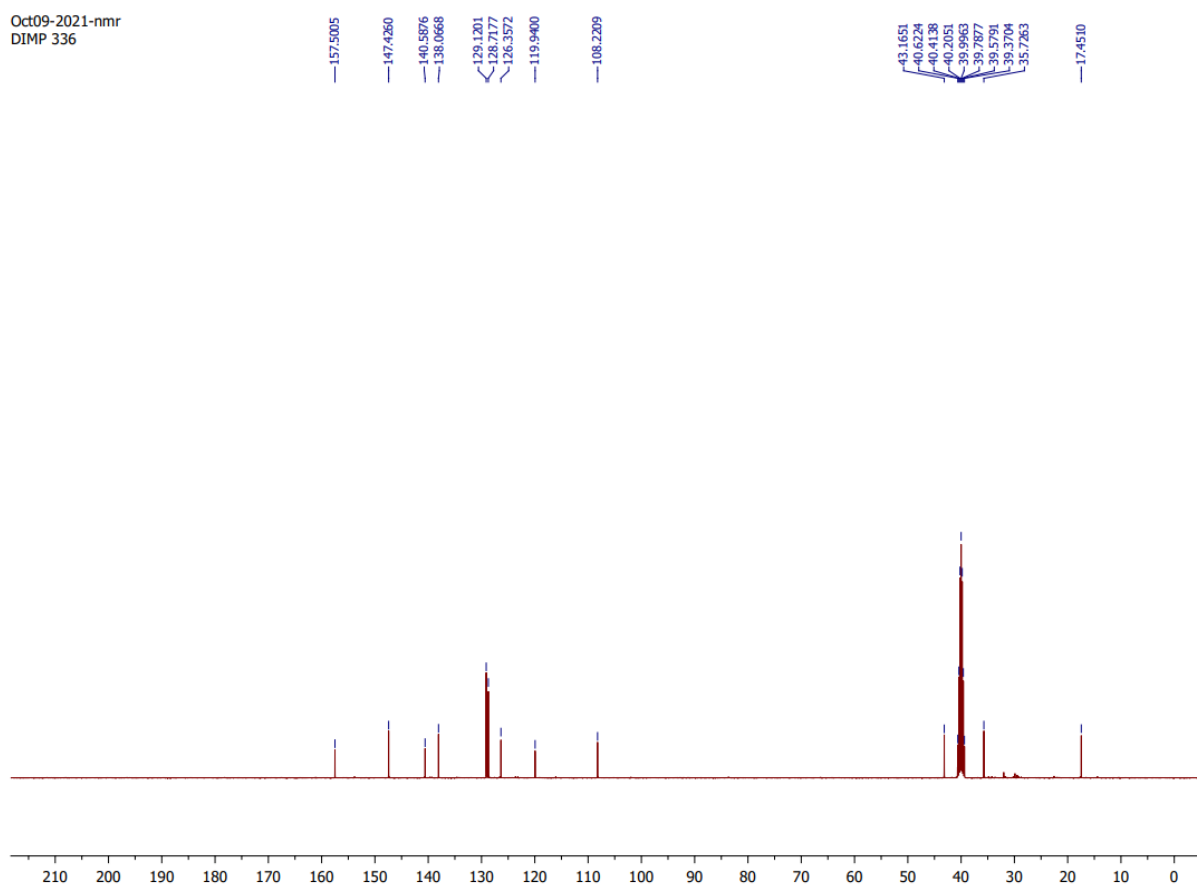

## HRMS

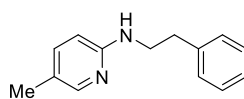

## 5-Methyl-*N*-phenethylpyridin-2-amine (4c)

DIMP-336  
DIMP-336 6 (0.099) Cm (6:8)

TOF MS ES+  
5.53e6

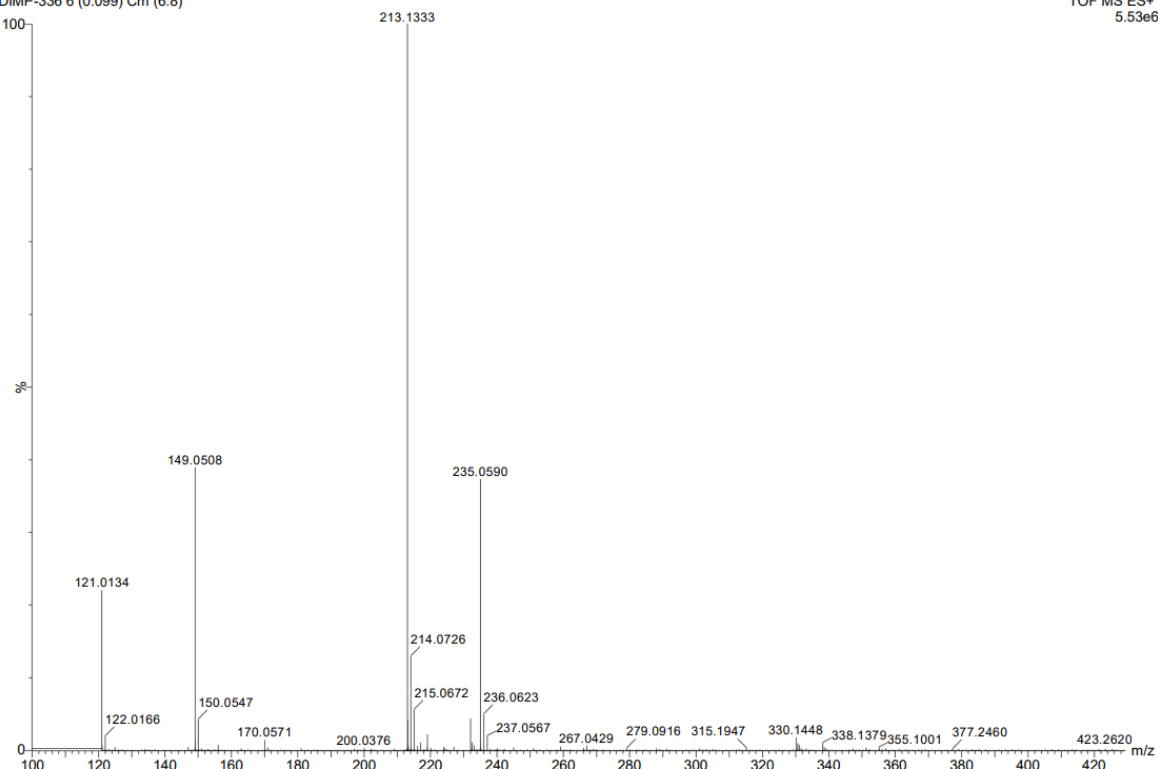

**$^1\text{H}$  NMR**  
**(400 MHz,  $\text{CDCl}_3$ )**

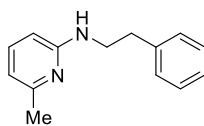

**6-Methyl-*N*-phenethylpyridin-2-amine (4d)**

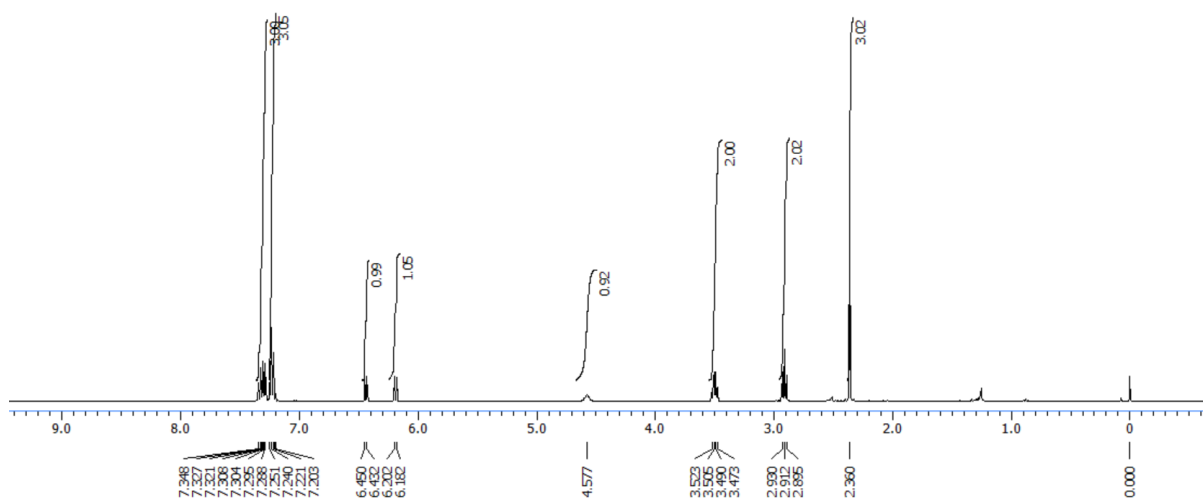

**<sup>13</sup>C NMR**

**(100 MHz, CDCl<sub>3</sub>)**

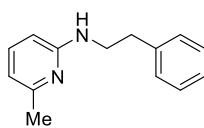

**6-Methyl-*N*-phenethylpyridin-2-amine (4d)**

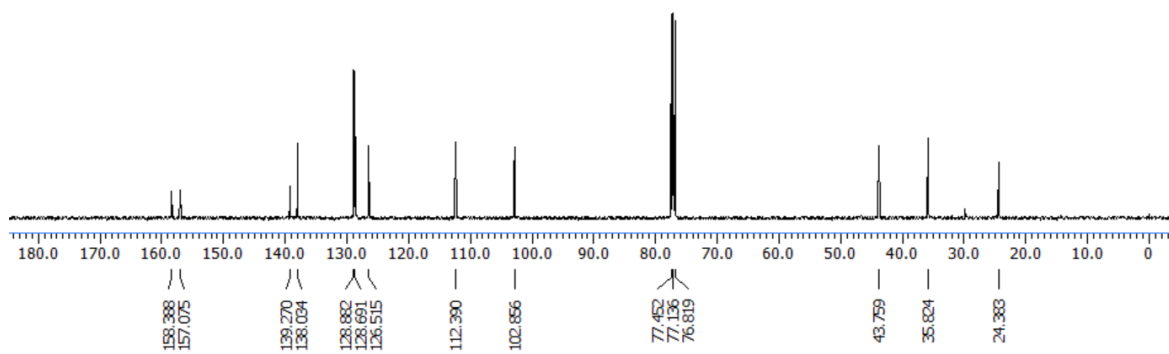

**HRMS**



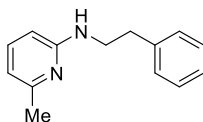

### 6-Methyl-N-phenethylpyridin-2-amine (4d)

#### Elemental Composition Report

Page 1

#### Single Mass Analysis

Tolerance = 10.0 PPM / DBE: min = -1.5, max = 50.0

Element prediction: Off

Number of isotope peaks used for i-FIT = 3

Monoisotopic Mass, Even Electron Ions

27 formula(e) evaluated with 1 results within limits (up to 3 closest results for each mass)

Elements Used:

C: 0-14 H: 0-200 N: 0-2 F: 0-3

DIMP-313

QMI DIVISION, CSIR-IIIM JAMMU  
Xevo G2-XS QTOF YFC2015

22-Nov-2021

12:23:59

1: TOF MS ES+  
5.10e+005

221121\_17 35 (0.707) Cm (35)

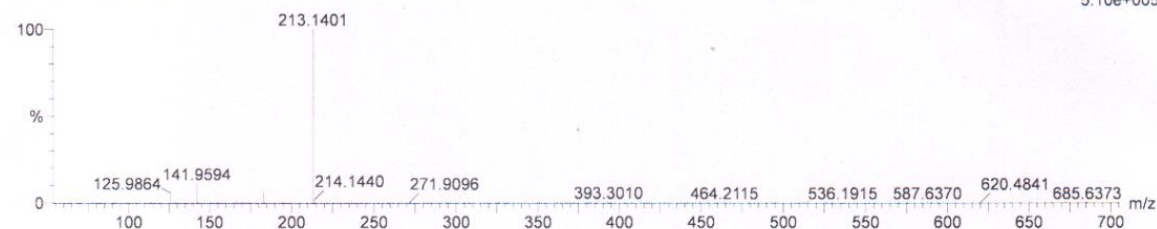

Minimum: -1.5  
Maximum: 50.0

| Mass     | Calc. Mass | mDa | PPM | DBE | i-FIT | Norm | Conf(%) | Formula    |
|----------|------------|-----|-----|-----|-------|------|---------|------------|
| 213.1401 | 213.1392   | 0.9 | 4.2 | 7.5 | 36.6  | n/a  | n/a     | C14 H17 N2 |

### <sup>1</sup>H NMR

(400 MHz, (CD<sub>3</sub>)<sub>2</sub>SO)

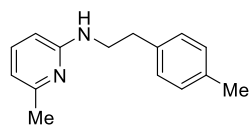

**6-Methyl-N-(4-methylphenethyl)pyridin-2-amine (4e)**

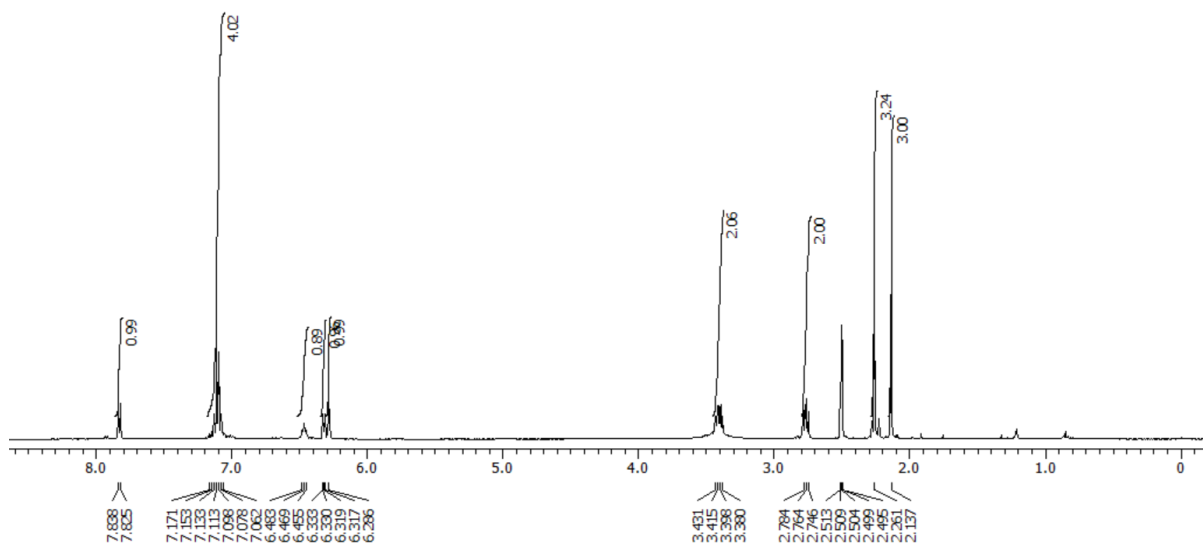

<sup>13</sup>C NMR

(100 MHz, (CD<sub>3</sub>)<sub>2</sub>SO)

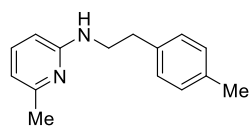

**6-Methyl-N-(4-methylphenethyl)pyridin-2-amine (4e)**

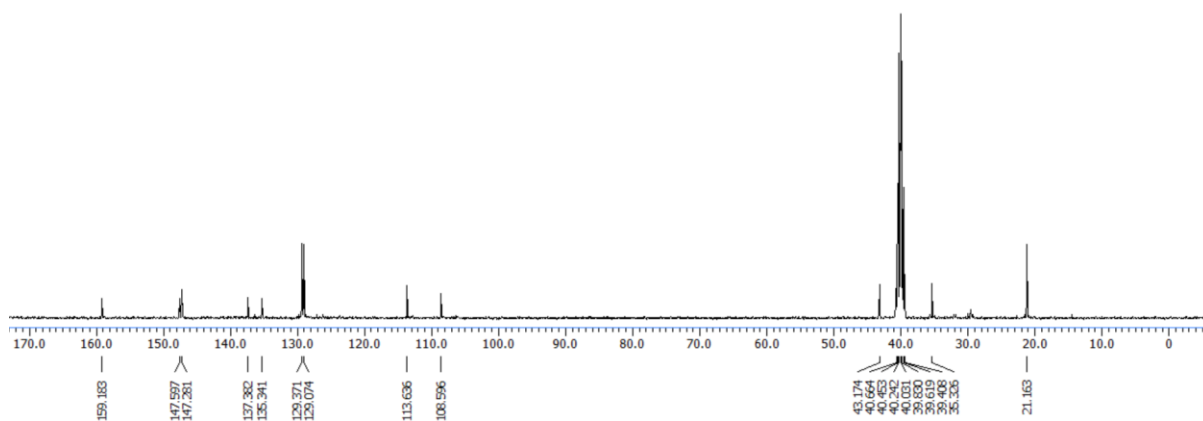

HRMS

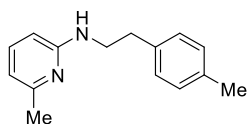

### 6-Methyl-*N*-(4-methylphenethyl)pyridin-2-amine (4e)

#### Elemental Composition Report

Page 1

#### Single Mass Analysis

Tolerance = 10.0 PPM / DBE: min = -1.5, max = 50.0

Element prediction: Off

Number of isotope peaks used for i-FIT = 3

Monoisotopic Mass, Even Electron Ions

4 formula(e) evaluated with 1 results within limits (up to 3 closest results for each mass)

Elements Used:

C: 0-15 H: 0-200 N: 0-2

DIMP-331

QMI DIVISION, CSIR-IIIM JAMMU  
Xevo G2-XS QTOF YFC2015

22-Nov-2021

12:31:41

1: TOF MS ES+

8.68e+005

221121\_20 19 (0.397) Cm (19:20)

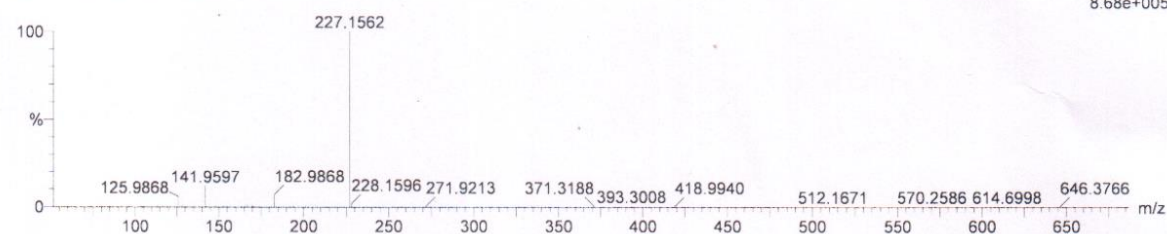

Minimum: -1.5  
Maximum: 2.0 10.0 50.0

| Mass     | Calc. Mass | mDa | PPM | DBE | i-FIT | Norm | Conf(%) | Formula    |
|----------|------------|-----|-----|-----|-------|------|---------|------------|
| 227.1562 | 227.1548   | 1.4 | 6.2 | 7.5 | 39.4  | n/a  | n/a     | C15 H19 N2 |

#### <sup>1</sup>H NMR

(400 MHz, (CD<sub>3</sub>)<sub>2</sub>SO)

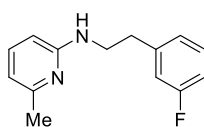

**6-Methyl-N-(3-fluoromethylphenethyl)pyridin-2-amine (4f)**

Sep14-2021-nmr  
DIMP-332

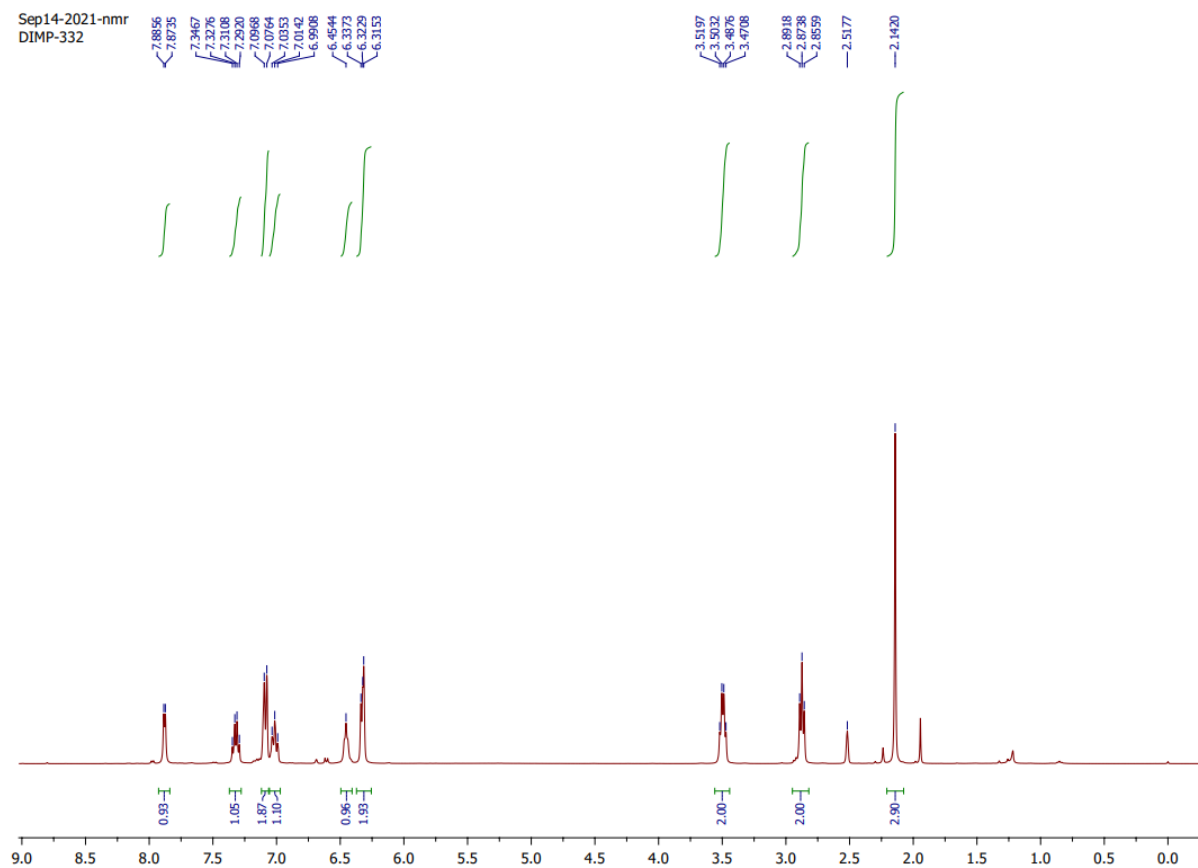

<sup>13</sup>C NMR

(100 MHz, (CD<sub>3</sub>)<sub>2</sub>SO)

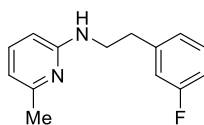

**6-Methyl-N-(3-fluoromethylphenethyl)pyridin-2-amine (4f)**

Sep14-2021-nmr  
DIMP-332

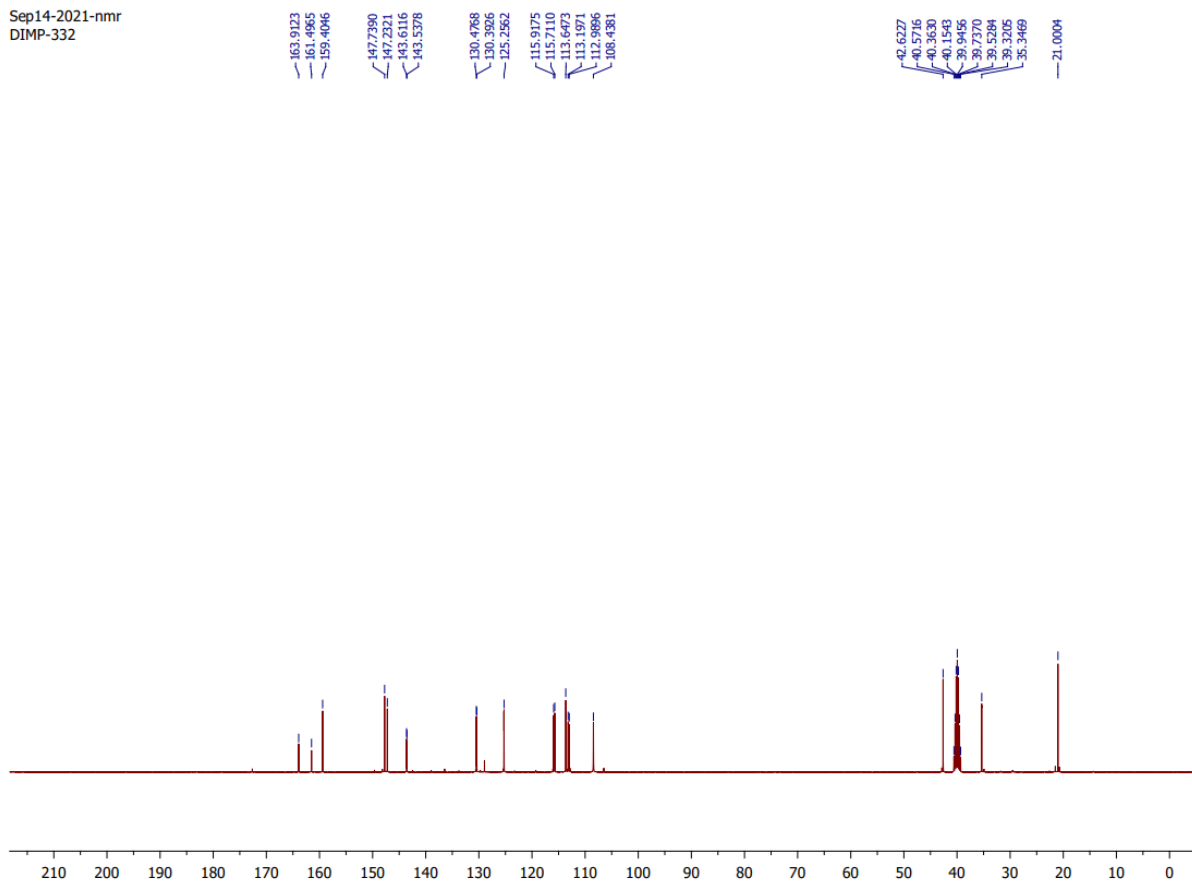

**HRMS**

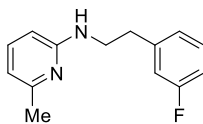

### 6-Methyl-N-(3-fluoromethylphenethyl)pyridin-2-amine (4f)

#### Elemental Composition Report

Page 1

#### Single Mass Analysis

Tolerance = 10.0 PPM / DBE: min = -1.5, max = 50.0

Element prediction: Off

Number of isotope peaks used for i-FIT = 3

Monoisotopic Mass, Even Electron Ions

23 formula(e) evaluated with 1 results within limits (up to 3 closest results for each mass)

Elements Used:

C: 0-14 H: 0-200 N: 0-2 F: 0-3

DIMP-332

QMI DIVISION, CSIR-IIIM JAMMU  
Xevo G2-XS QTOF YFC2015

22-Nov-2021

12:26:33

1: TOF MS ES+

5.08e+005

221121\_18 31 (0.620) Cm (31)

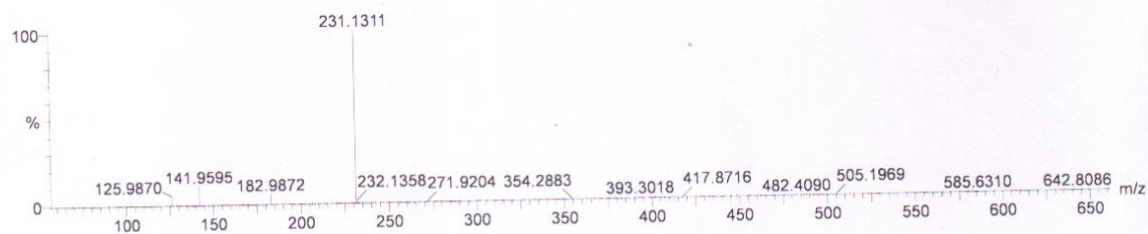

Minimum: -1.5  
Maximum: 2.0 10.0 50.0

| Mass     | Calc. Mass | mDa | PPM | DBE | i-FIT | Norm | Conf(%) | Formula      |
|----------|------------|-----|-----|-----|-------|------|---------|--------------|
| 231.1311 | 231.1298   | 1.3 | 5.6 | 7.5 | 45.3  | n/a  | n/a     | C14 H16 N2 F |

#### <sup>1</sup>H NMR

(400 MHz, (CD<sub>3</sub>)<sub>2</sub>SO)

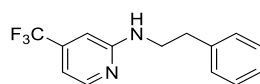

***N*-Phenethyl-4-(trifluoromethyl)pyridine-2-amine (4g)**

Sep16-2021-nmr  
DIMP-346

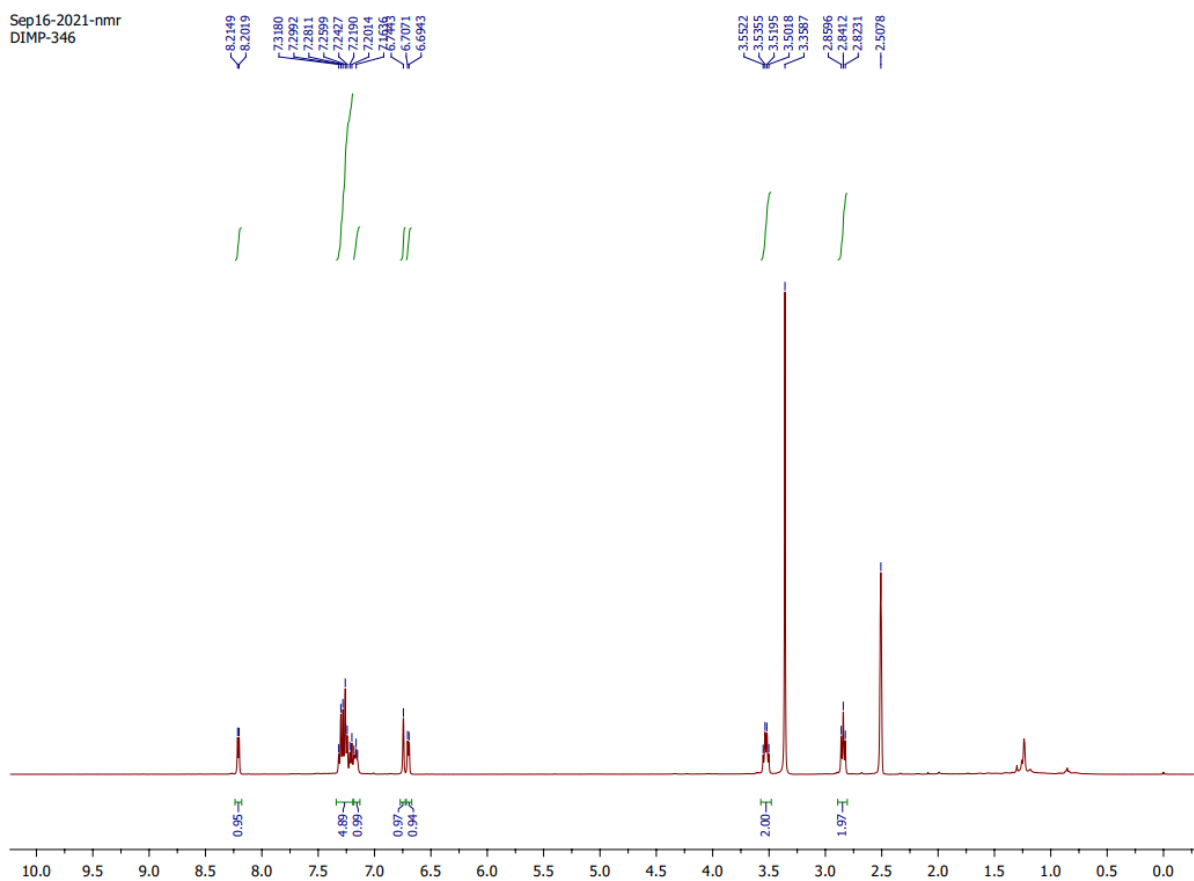

<sup>13</sup>C NMR

(100 MHz, (CD<sub>3</sub>)<sub>2</sub>SO)

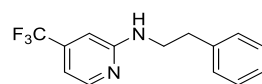

***N*-Phenethyl-4-(trifluoromethyl)pyridin-2-amine (4g)**

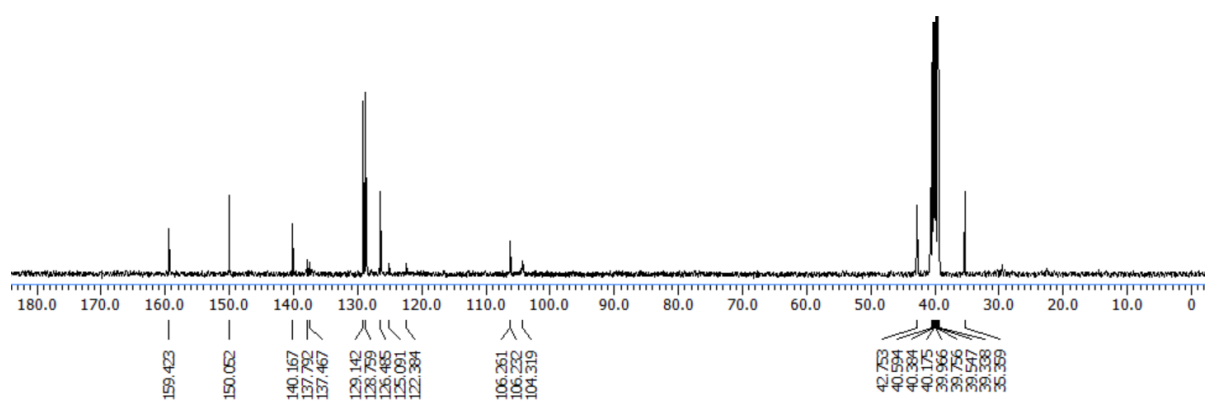

**HRMS**



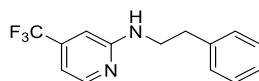

## N-Phenethyl-4-(trifluoromethyl)pyridine-2-amine (4g)

### Elemental Composition Report

Page 1

#### Single Mass Analysis

Tolerance = 10.0 PPM / DBE: min = -1.5, max = 50.0

Element prediction: Off

Number of isotope peaks used for i-FIT = 3

Monoisotopic Mass, Even Electron Ions

13 formula(e) evaluated with 1 results within limits (up to 3 closest results for each mass)

Elements Used:

C: 0-14 H: 0-200 N: 0-2 F: 0-3

DIMP-346

QMI DIVISION, CSIR-IIIM JAMMU  
Xevo G2-XS QTOF YFC2015

22-Nov-2021  
12:21:24  
1: TOF MS ES+  
6.38e+005

221121\_16 14 (0.293) Cm (14:15)

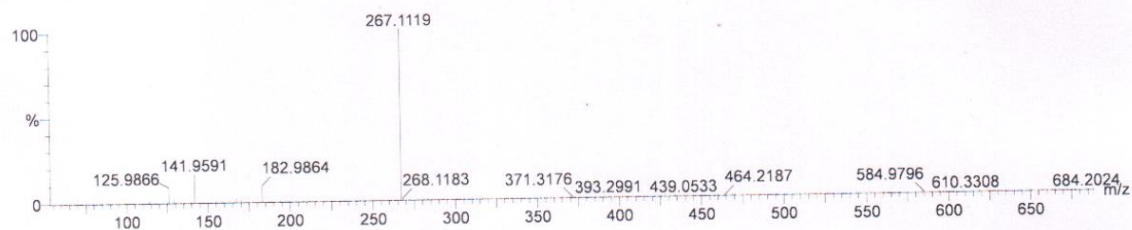

Minimum: -1.5  
Maximum: 2.0 10.0 50.0

| Mass     | Calc. Mass | mDa | PPM | DBE | i-FIT | Norm | Conf(%) | Formula       |
|----------|------------|-----|-----|-----|-------|------|---------|---------------|
| 267.1119 | 267.1109   | 1.0 | 3.7 | 7.5 | 40.5  | n/a  | n/a     | C14 H14 N2 F3 |

### <sup>1</sup>H NMR

(400 MHz, (CD<sub>3</sub>)<sub>2</sub>SO)

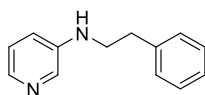

*N*-Phenethylpyridin-3-amine (4h)

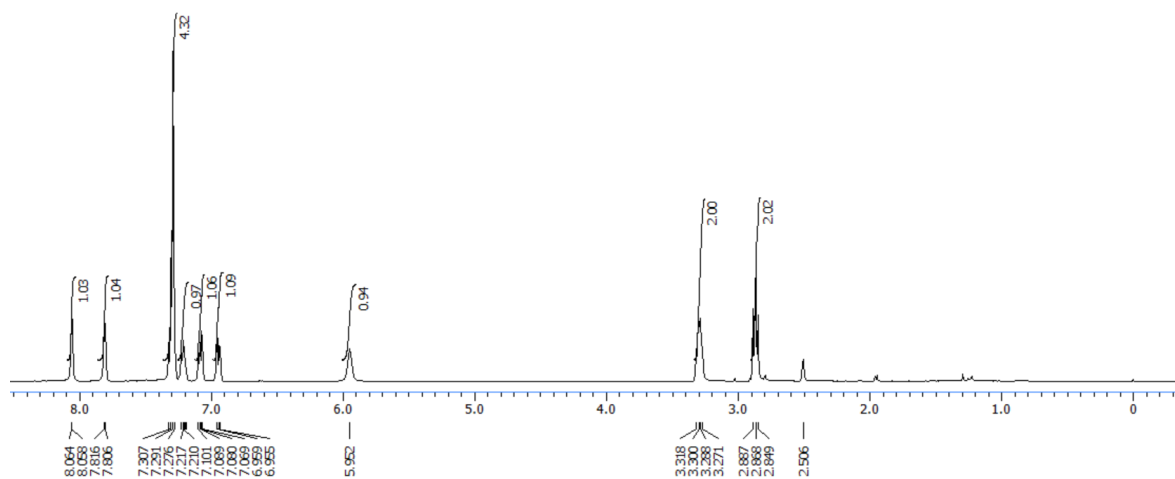

<sup>13</sup>C NMR

(100 MHz, (CD<sub>3</sub>)<sub>2</sub>SO)

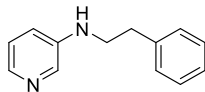

*N*-Phenethylpyridin-3-amine (4h)

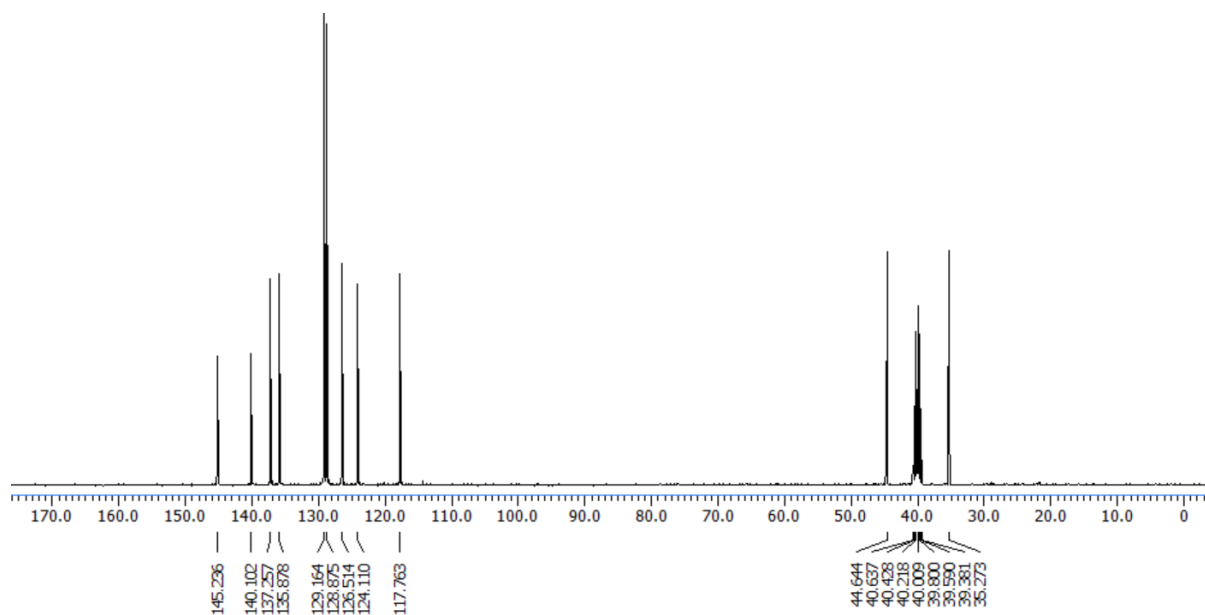

HRMS

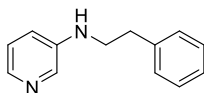

### N-Phenethylpyridin-3-amine (4h)

#### Elemental Composition Report

Page 1

#### Single Mass Analysis

Tolerance = 10.0 PPM / DBE: min = -1.5, max = 50.0

Element prediction: Off

Number of isotope peaks used for i-FIT = 3

Monoisotopic Mass, Even Electron Ions

29 formula(e) evaluated with 1 results within limits (up to 3 closest results for each mass)

Elements Used:

C: 0-14 H: 0-200 N: 0-2 F: 0-3

DIMP-255

QMI DIVISION, CSIR-IIIM JAMMU  
Xevo G2-XS QTOF YFC2015

22-Nov-2021

12:29:07

1: TOF MS ES+

2.43e+005

221121\_19 32 (0.637) Cm (32)

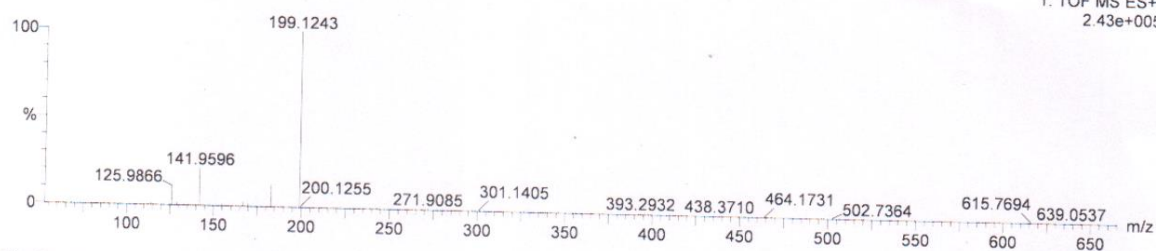

Minimum:

Maximum:

2.0 10.0 -1.5  
50.0

| Mass     | Calc. Mass | mDa | PPM | DBE | i-FIT | Norm | Conf(%) | Formula    |
|----------|------------|-----|-----|-----|-------|------|---------|------------|
| 199.1243 | 199.1235   | 0.8 | 4.0 | 7.5 | 42.8  | n/a  | n/a     | C13 H15 N2 |

#### <sup>1</sup>H NMR

(400 MHz, (CD<sub>3</sub>)<sub>2</sub>SO)

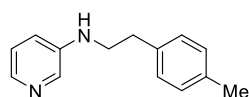

***N*-(4-Methylphenethyl)pyridin-3-amine (4i)**

Jul20-2021-nmr  
DIMP-264

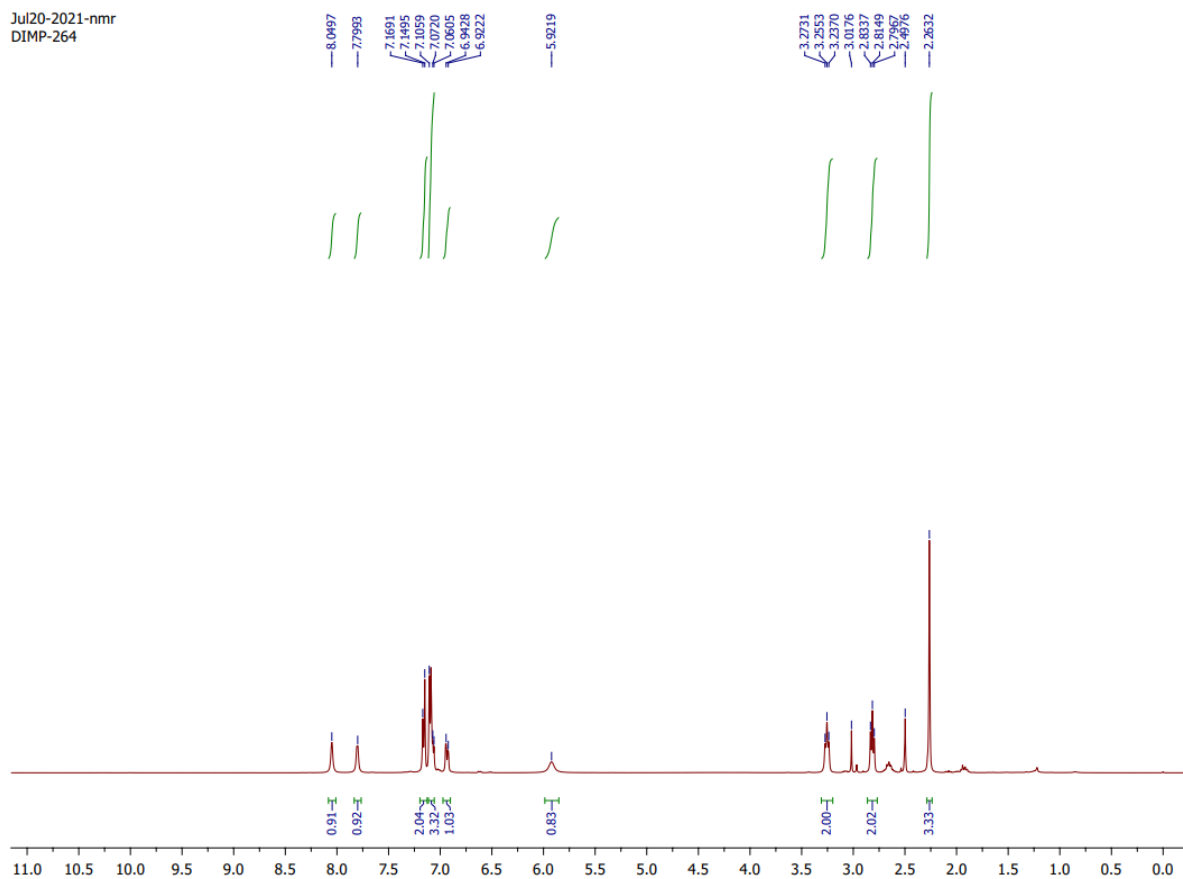

<sup>13</sup>C NMR

(100 MHz, (CD<sub>3</sub>)<sub>2</sub>SO)

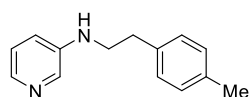

***N*-(4-Methylphenethyl)pyridin-3-amine (4i)**

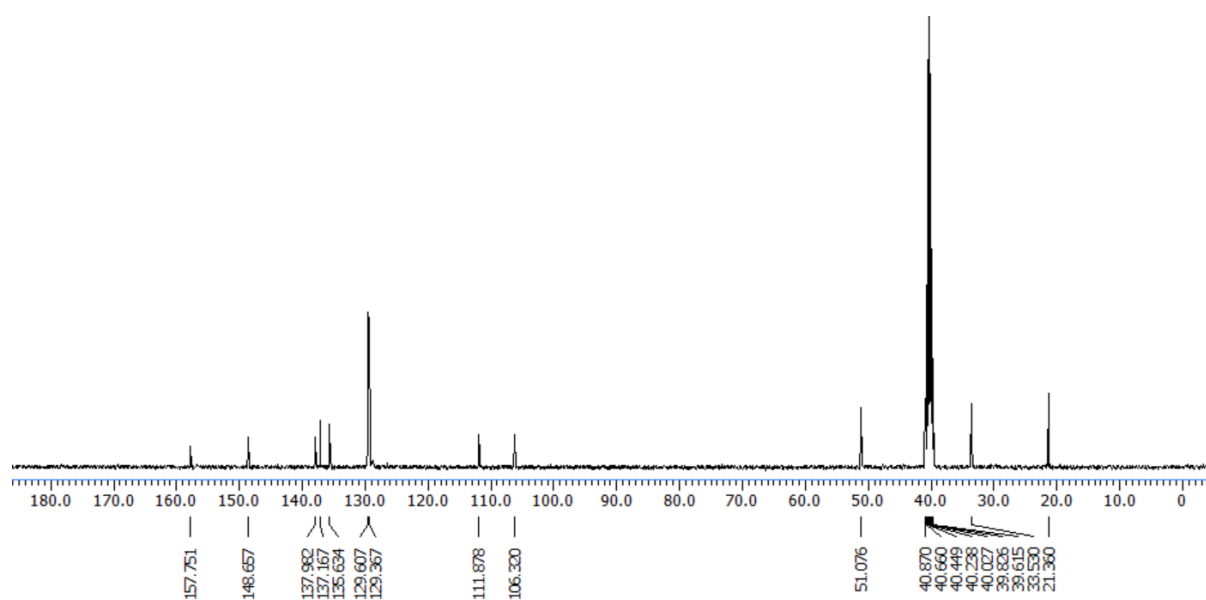

**HRMS**

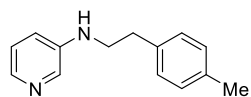

***N*-(4-Methylphenethyl)pyridin-3-amine (4i)**

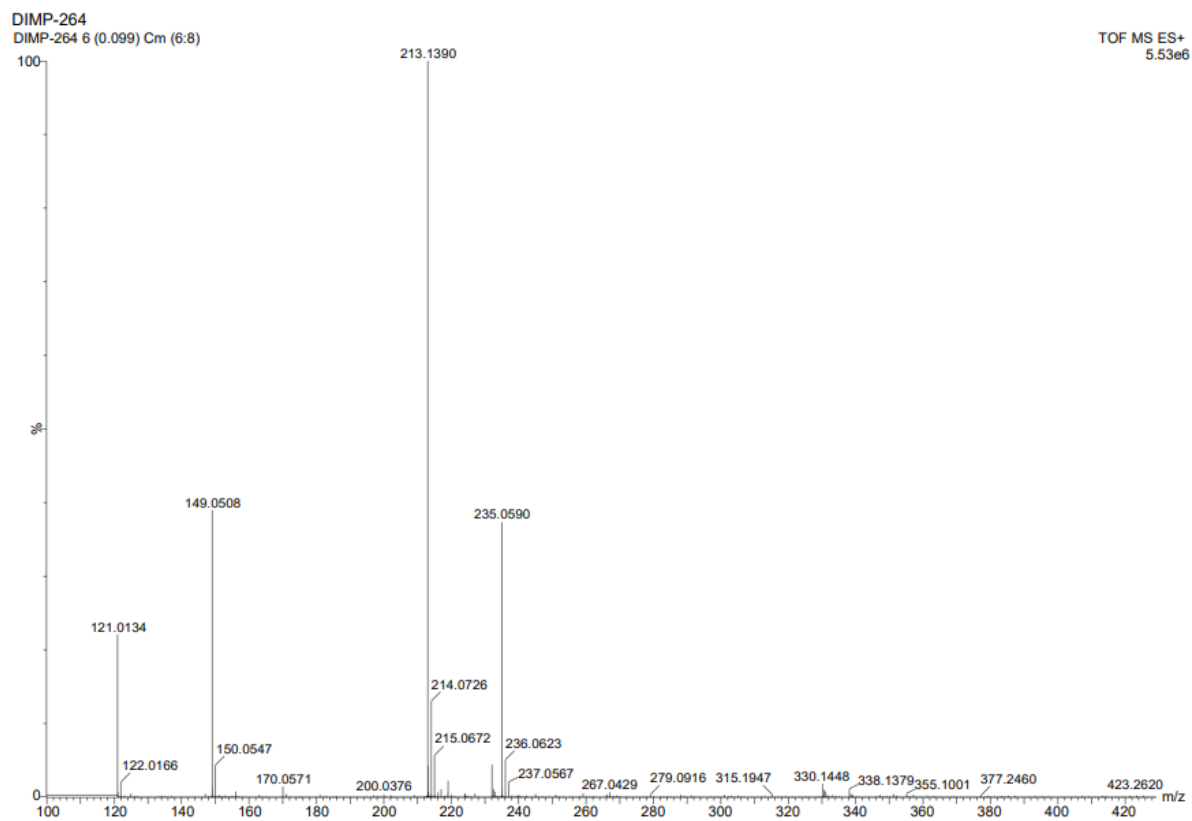

**<sup>1</sup>H NMR**

(400 MHz, (CD<sub>3</sub>)<sub>2</sub>SO)

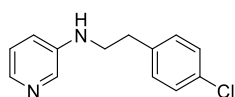

***N*-(4-Chlorophenethyl)pyridin-3-amine (4j)**

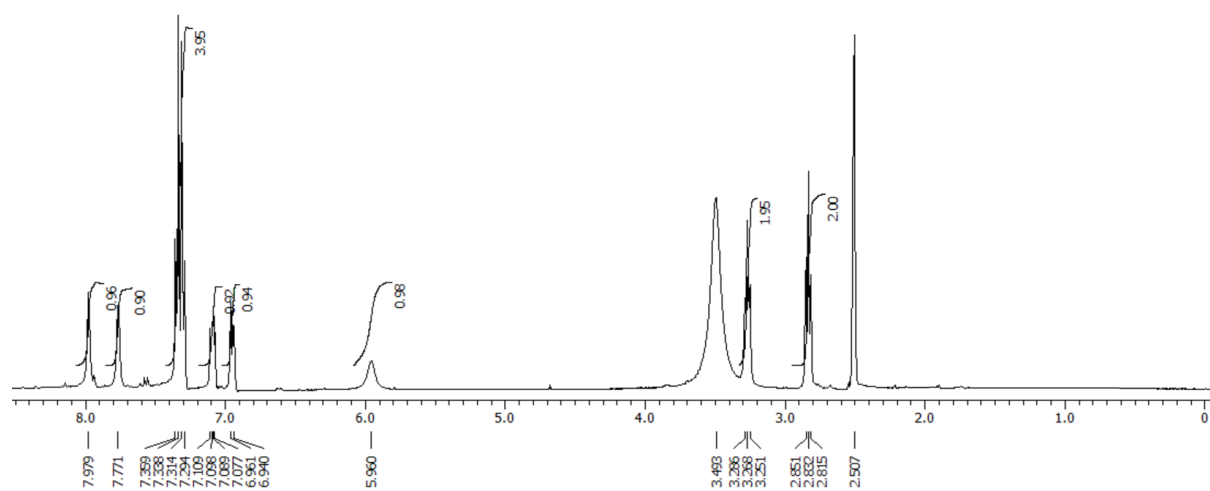

<sup>13</sup>C NMR

Nc1ccc(NCCc2ccc(Cl)cc2)cc1

Dec21-2021-nmr  
DIMP-335

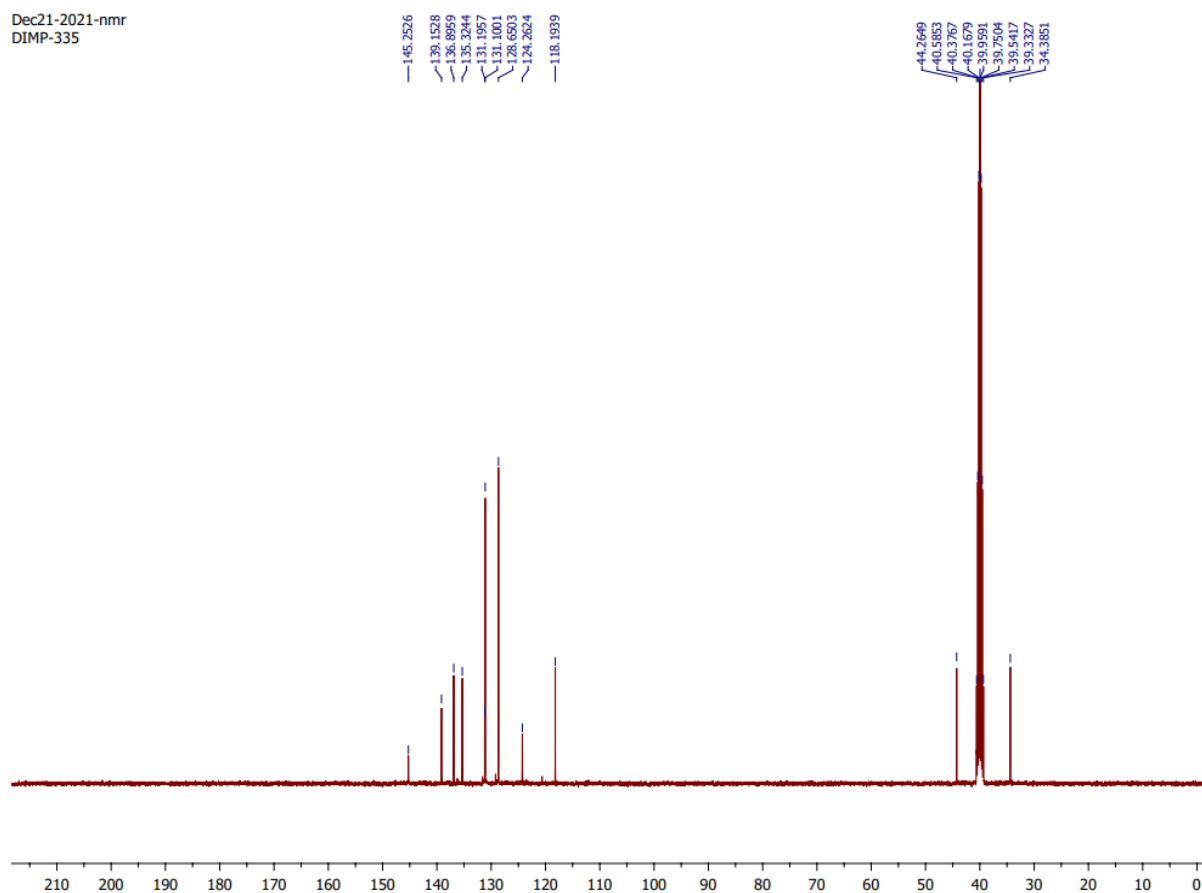

84



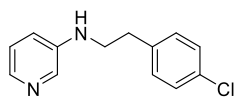

***N*-(4-Chlorophenethyl)pyridin-3-amine (4j)**

DIMP-335  
DIMP-335 12 (0.101) Cm (9:23)

1: TOF MS ES+  
7.61e5

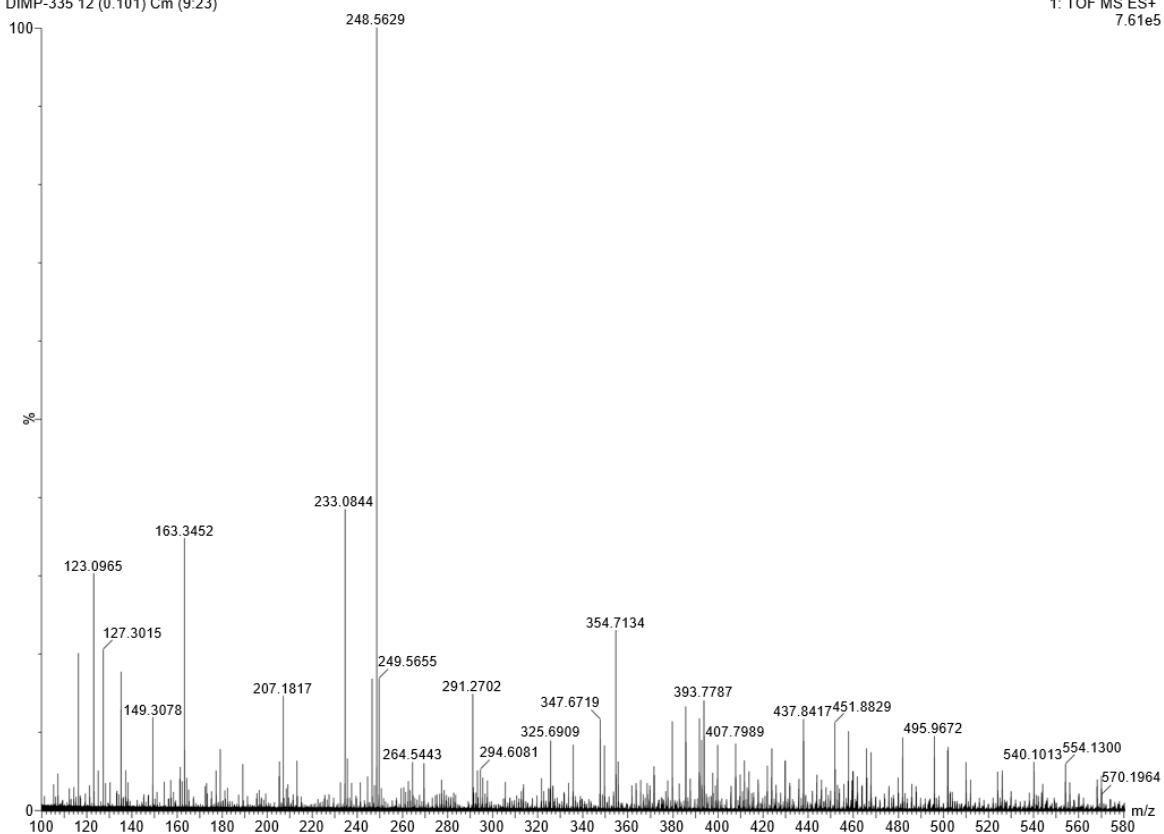

**<sup>1</sup>H NMR**

(400 MHz, CDCl<sub>3</sub>)

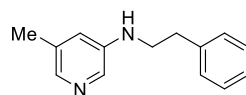

**5-Methyl-N-phenethylpyridin-3-amine (4k)**

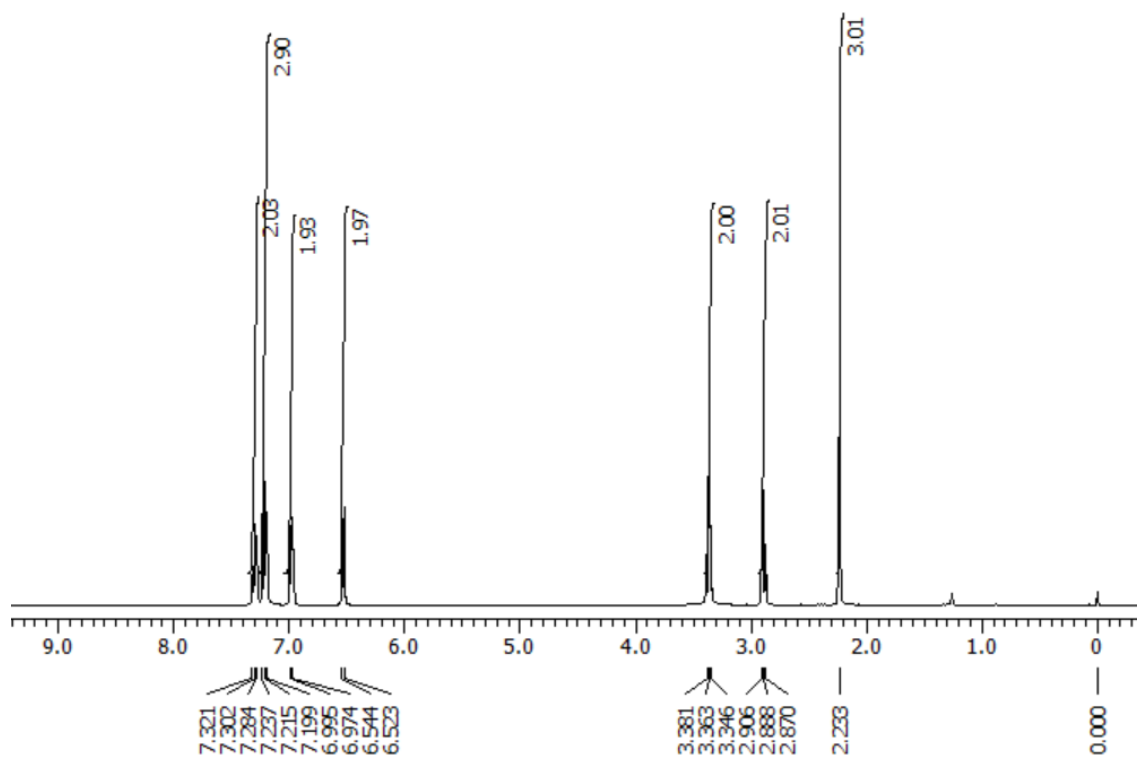

<sup>13</sup>C NMR

(100 MHz, CDCl<sub>3</sub>)

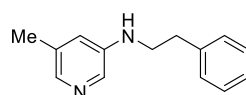

**5-Methyl-N-phenethylpyridin-3-amine (4k)**

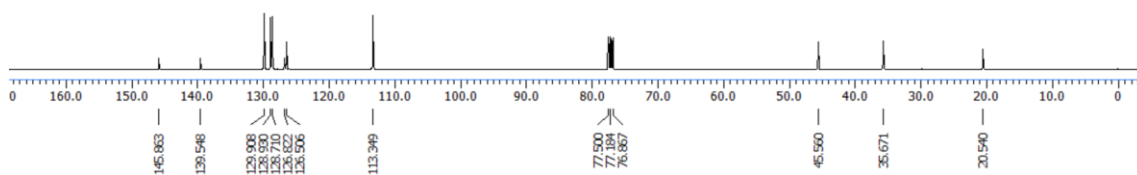

HRMS

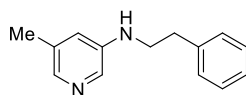

### 5-Methyl-N-phenethylpyridin-3-amine (4k)

#### Elemental Composition Report

Page 1

##### Single Mass Analysis

Tolerance = 10.0 PPM / DBE: min = -1.5, max = 50.0

Element prediction: Off

Number of isotope peaks used for i-FIT = 3

Monoisotopic Mass, Even Electron Ions

9 formula(e) evaluated with 1 results within limits (up to 3 closest results for each mass)

Elements Used:

C: 0-20 H: 0-200 N: 0-2

DIMP-378

QMI DIVISION, CSIR-IIIM JAMMU  
Xevo G2-XS QTOF YFC2015

22-Nov-2021

12:08:34

1: TOF MS ES+

9.38e+005

221121\_11 21 (0.431) Cm (21:22)

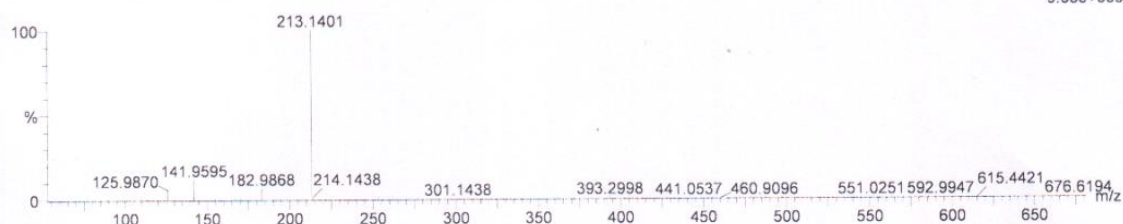

Minimum: -1.5  
Maximum: 2.0 10.0 50.0

| Mass     | Calc. Mass | mDa | PPM | DBE | i-FIT | Norm | Conf(%) | Formula    |
|----------|------------|-----|-----|-----|-------|------|---------|------------|
| 213.1401 | 213.1392   | 0.9 | 4.2 | 7.5 | 47.9  | n/a  | n/a     | C14 H17 N2 |

### <sup>1</sup>H NMR

(400 MHz, (CD<sub>3</sub>)<sub>2</sub>SO)

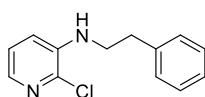

**2-Chloro-*N*-phenethylpyridin-3-amine (4l)**

Sep24-2021-nmr  
DIMP-316

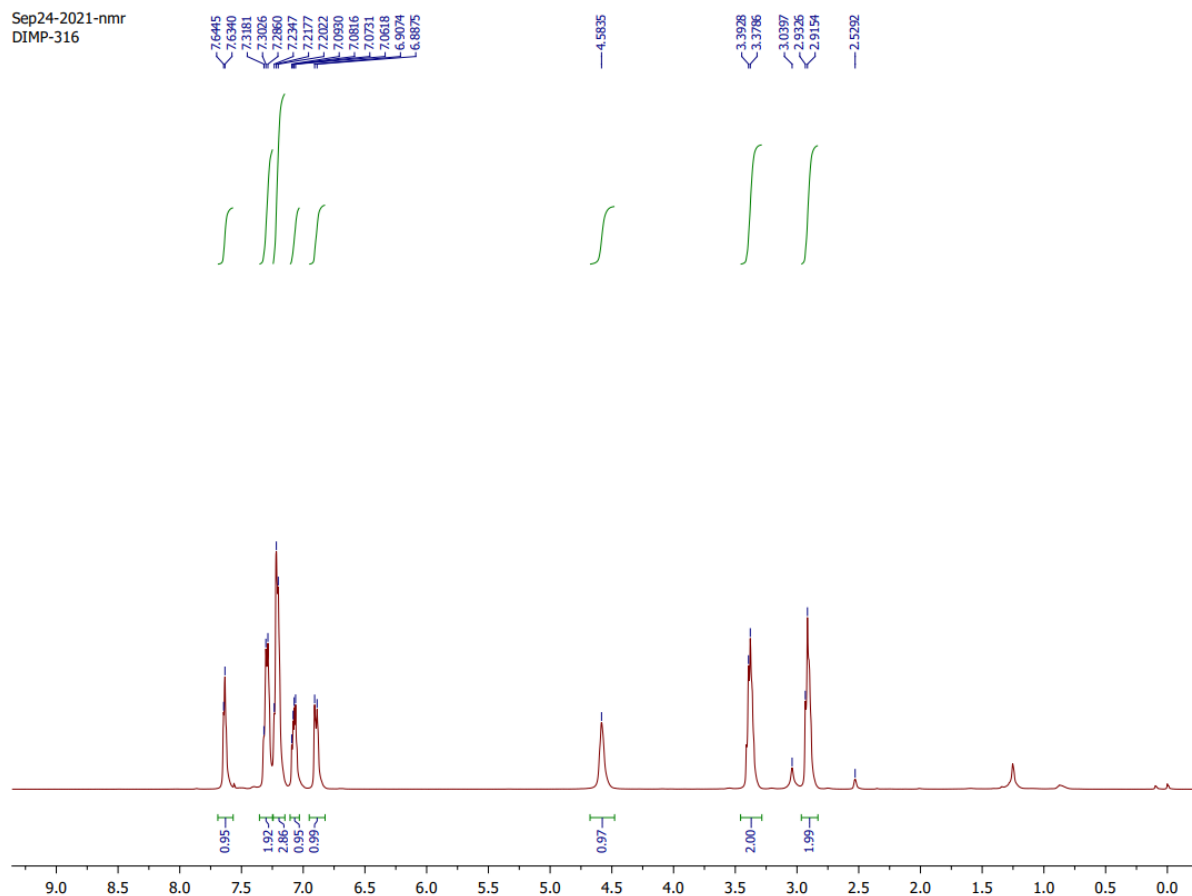

<sup>13</sup>C NMR

(100 MHz, (CD<sub>3</sub>)<sub>2</sub>SO)

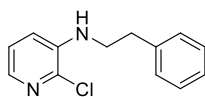

**2-Chloro-*N*-phenethylpyridin-3-amine (4l)**

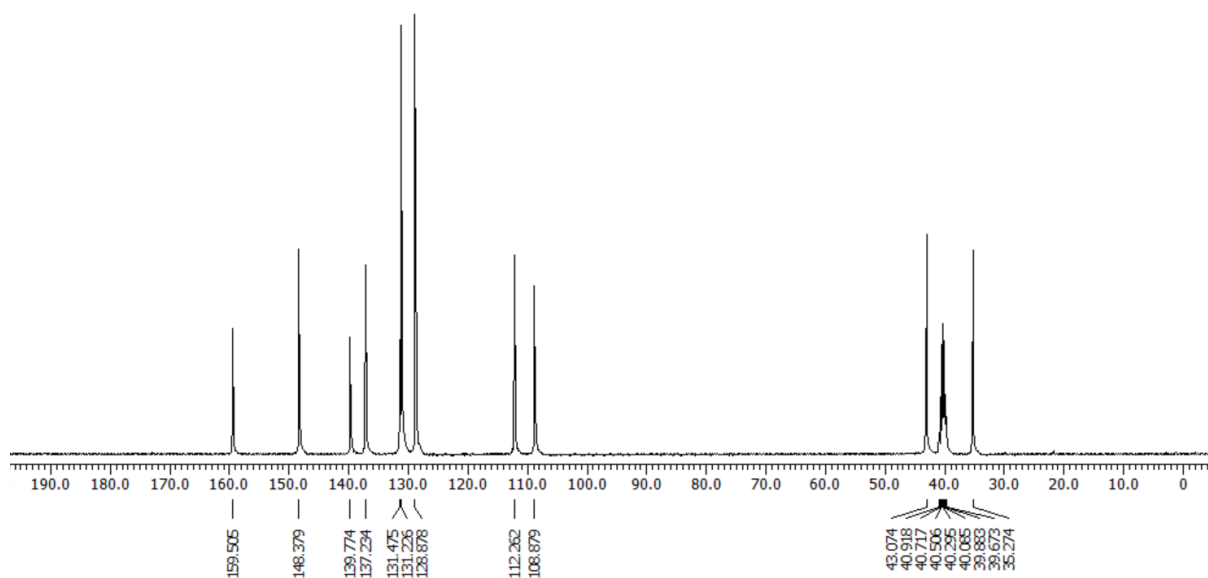

**HRMS**

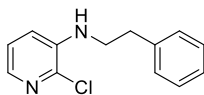

## 2-Chloro-*N*-phenethylpyridin-3-amine (4I)

### Elemental Composition Report

Page 1

#### Single Mass Analysis

Tolerance = 10.0 PPM / DBE: min = -1.5, max = 50.0

Element prediction: Off

Number of isotope peaks used for i-FIT = 3

Monoisotopic Mass, Even Electron Ions

7 formula(e) evaluated with 1 results within limits (up to 3 closest results for each mass)

Elements Used:

C: 0-13 H: 0-200 N: 0-2 Cl: 0-1

DIMP-316

QMI DIVISION, CSIR-IIIM JAMMU  
Xevo G2-XS QTOF YFC2015

22-Nov-2021

12:11:08

1: TOF MS ES+

8.42e+005

221121\_12 34 (0.691) Cm (34)

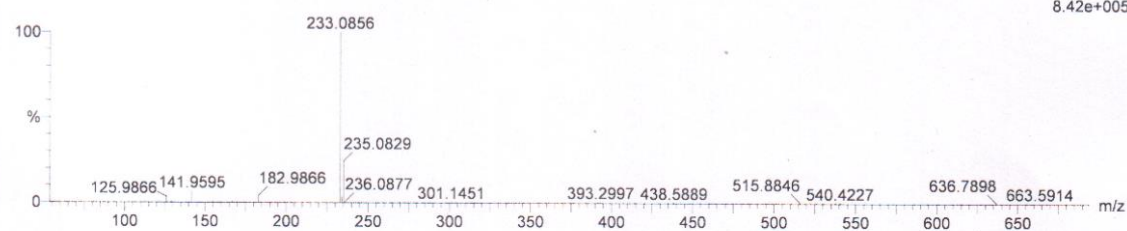

Minimum: -1.5  
Maximum: 2.0 10.0 50.0

| Mass     | Calc. Mass | mDa | PPM | DBE | i-FIT | Norm | Conf(%) | Formula       |
|----------|------------|-----|-----|-----|-------|------|---------|---------------|
| 233.0856 | 233.0846   | 1.0 | 4.3 | 7.5 | 31.0  | n/a  | n/a     | C13 H14 N2 Cl |

## <sup>1</sup>H NMR

(400 MHz, (CD<sub>3</sub>)<sub>2</sub>SO)

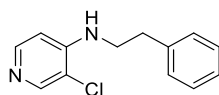

**3-Chloro-*N*-phenethylpyridin-4-amine (4m)**

Aug31-2021-nmr  
DIMP 314

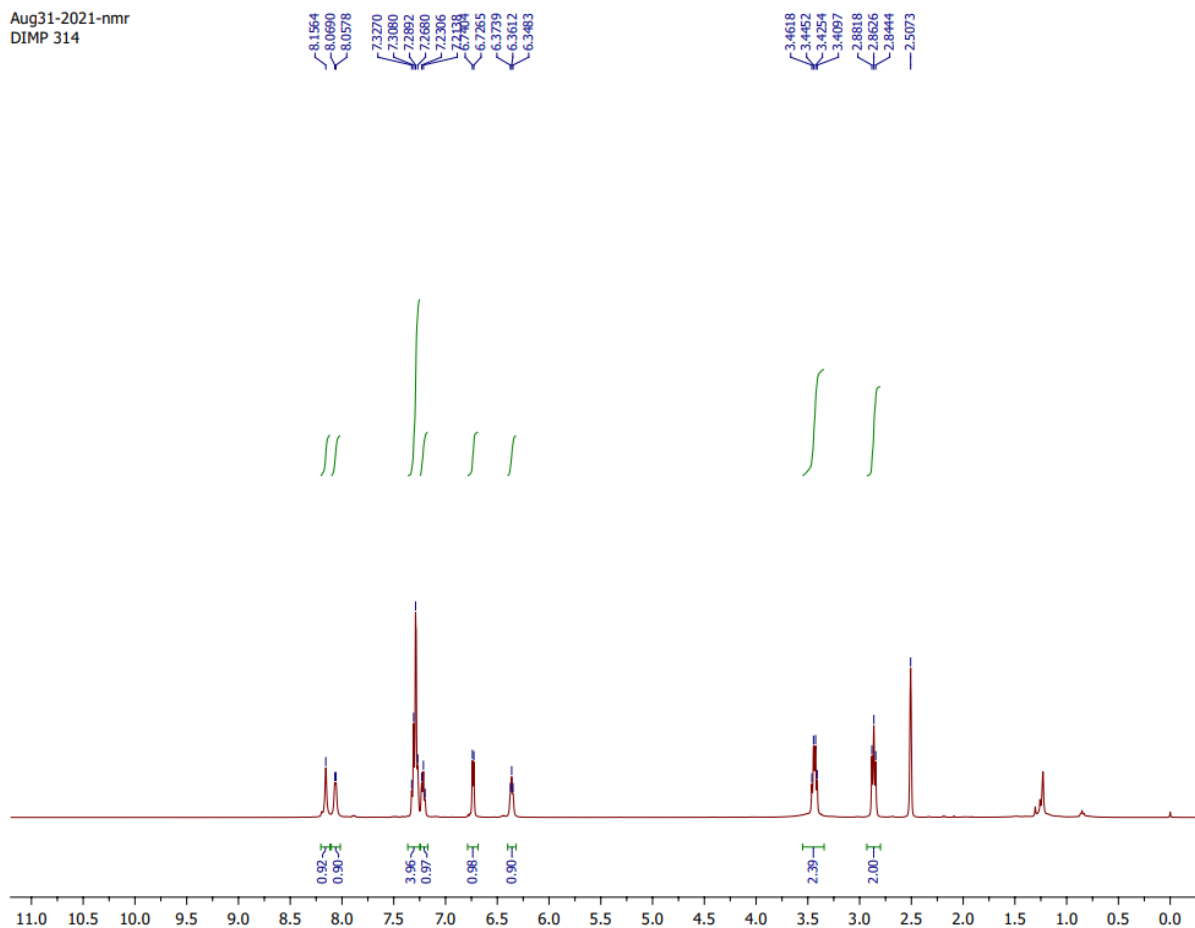

<sup>13</sup>C NMR

(100 MHz, (CD<sub>3</sub>)<sub>2</sub>SO)



**3-Chloro-*N*-phenethylpyridin-4-amine (4m)**

Aug31-2021-nmr  
DIMP 314

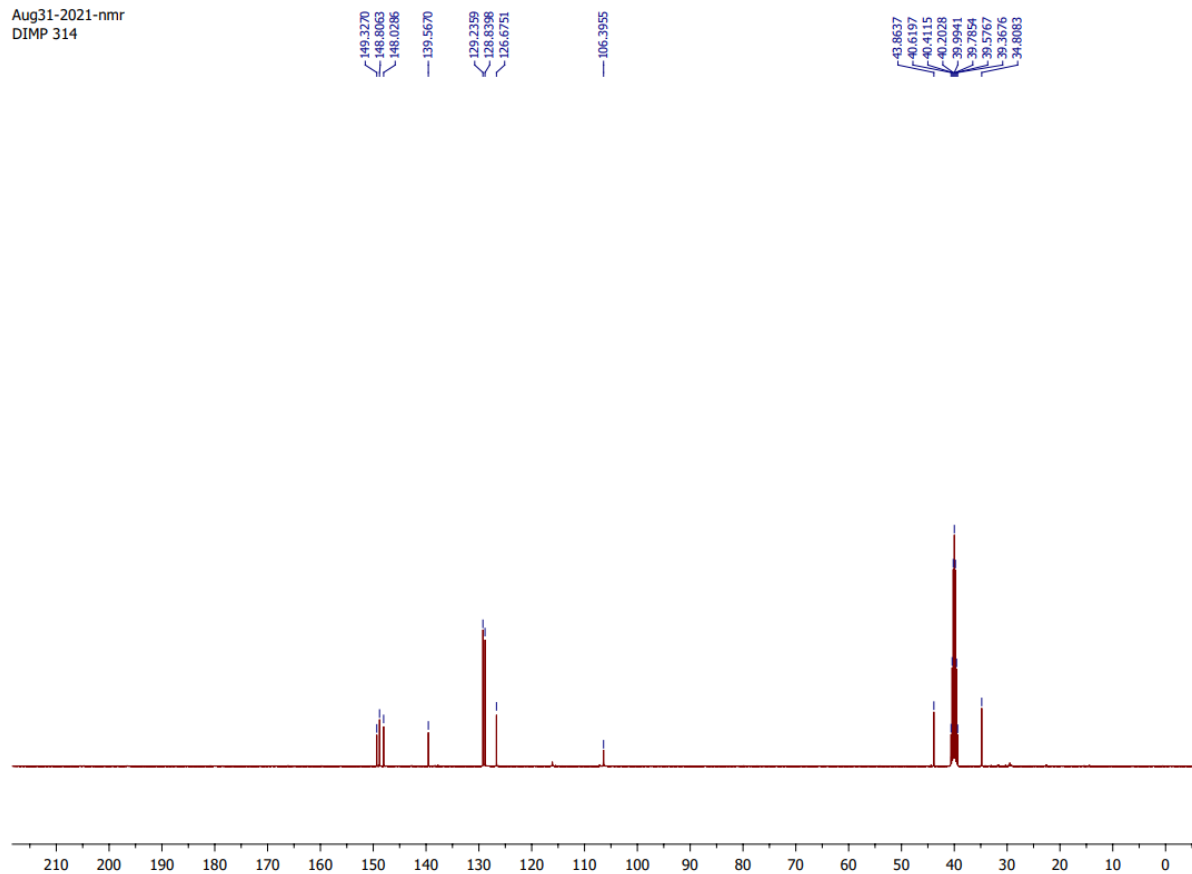

**HRMS**



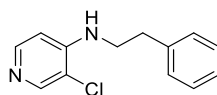

### 3-Chloro-*N*-phenethylpyridin-4-amine (4m)

#### Elemental Composition Report

Page 1

#### Single Mass Analysis

Tolerance = 10.0 PPM / DBE: min = -1.5, max = 50.0

Element prediction: Off

Number of isotope peaks used for i-FIT = 3

Monoisotopic Mass, Even Electron Ions

7 formula(e) evaluated with 1 results within limits (up to 3 closest results for each mass)

Elements Used:

C: 0-13 H: 0-200 N: 0-2 Cl: 0-1

DIMP-314

QMI DIVISION, CSIR-IIIM JAMMU  
Xevo G2-XS QTOF YFC2015

22-Nov-2021

12:13:42

1: TOF MS ES+

9.34e+005

221121\_13 37 (0.741) Cm (37)

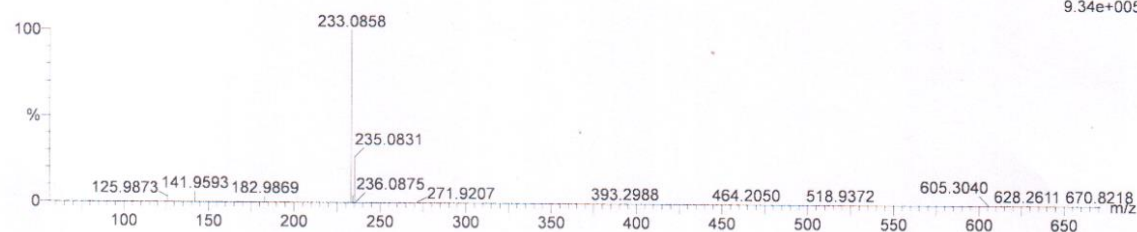

Minimum: -1.5  
Maximum: 2.0 10.0 50.0

| Mass     | Calc. Mass | mDa | PPM | DBE | i-FIT | Norm | Conf(%) | Formula       |
|----------|------------|-----|-----|-----|-------|------|---------|---------------|
| 233.0858 | 233.0846   | 1.2 | 5.1 | 7.5 | 30.8  | n/a  | n/a     | C13 H14 N2 Cl |

#### <sup>1</sup>H NMR

(400 MHz, CDCl<sub>3</sub>)

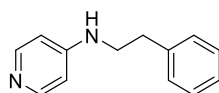

*N*-Phenethylpyridin-4-amine (4n)

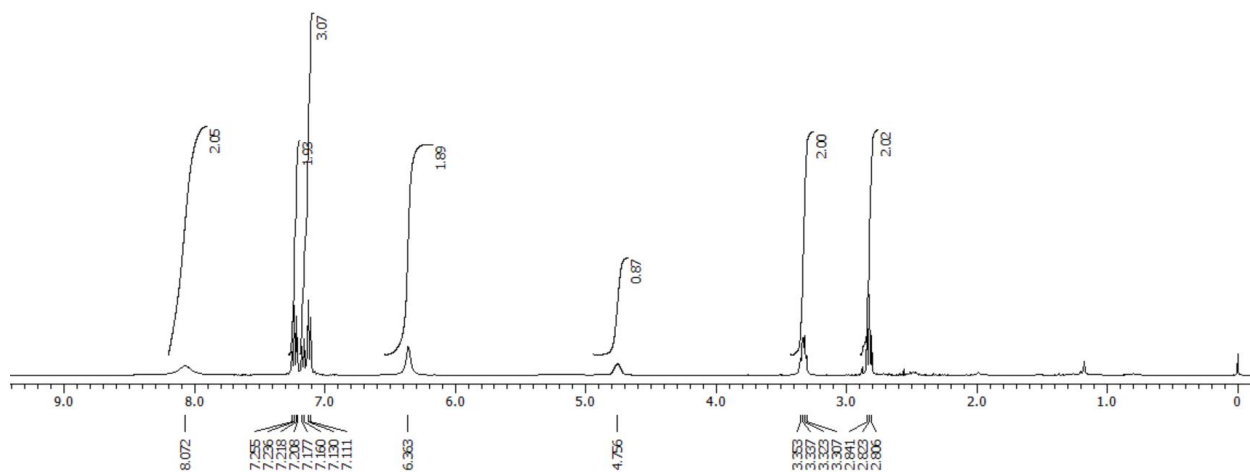

<sup>13</sup>C NMR

(100 MHz, CDCl<sub>3</sub>)

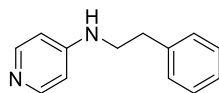

*N*-Phenethylpyridin-4-amine (4n)

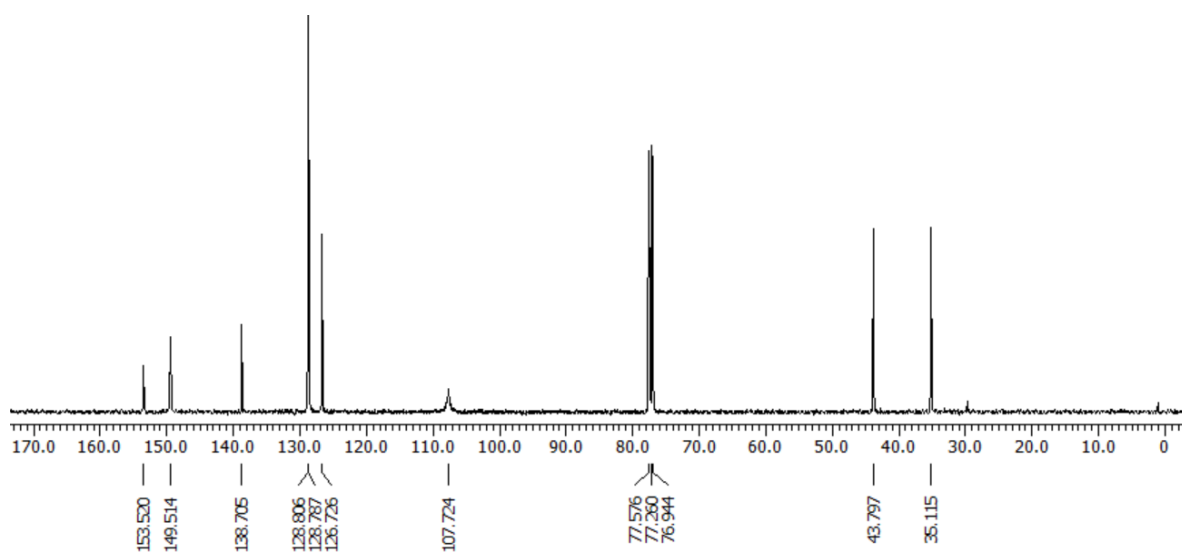

HRMS

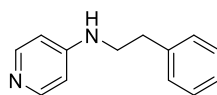

***N*-Phenethylpyridin-4-amine (4n)**

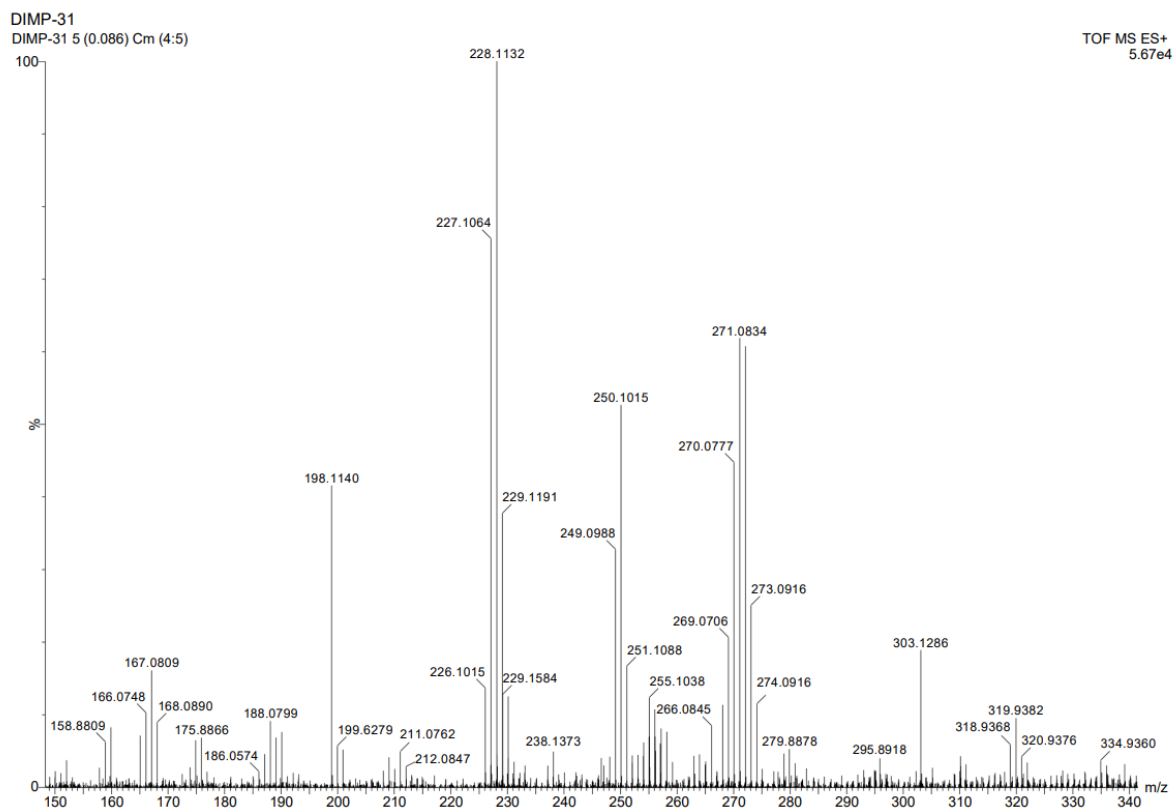

**<sup>1</sup>H NMR**

(400 MHz, CDCl<sub>3</sub>)

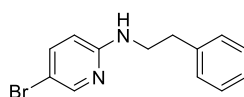

**5-Bromo-N-phenethylpyridin-2-amine (4o)**

Sep27-2021-nmr  
DIMP-368

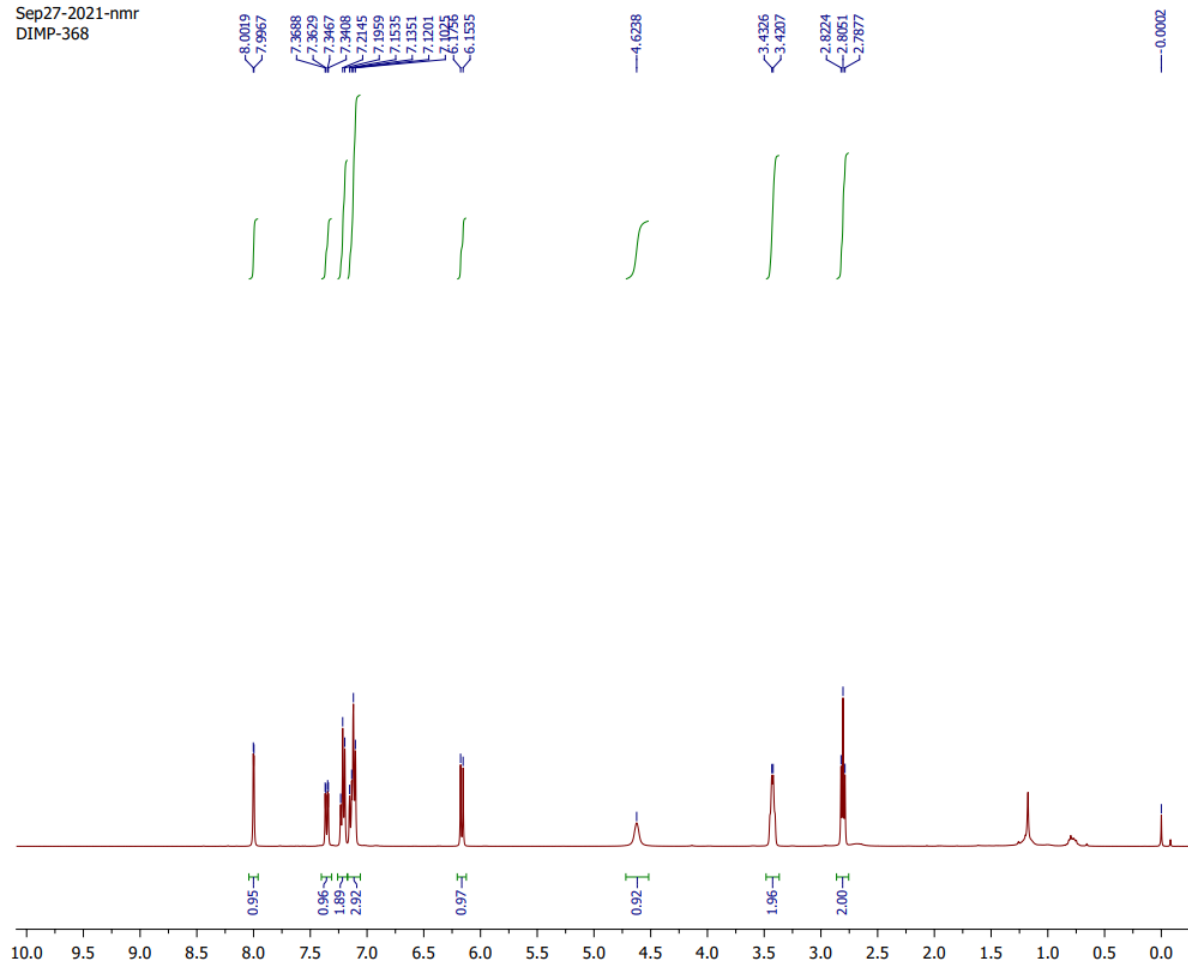

<sup>13</sup>C NMR

(100 MHz, CDCl<sub>3</sub>)

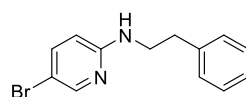

**5-Bromo-*N*-phenethylpyridin-2-amine (4o)**

Sep27-2021-nmr  
DIMP-368

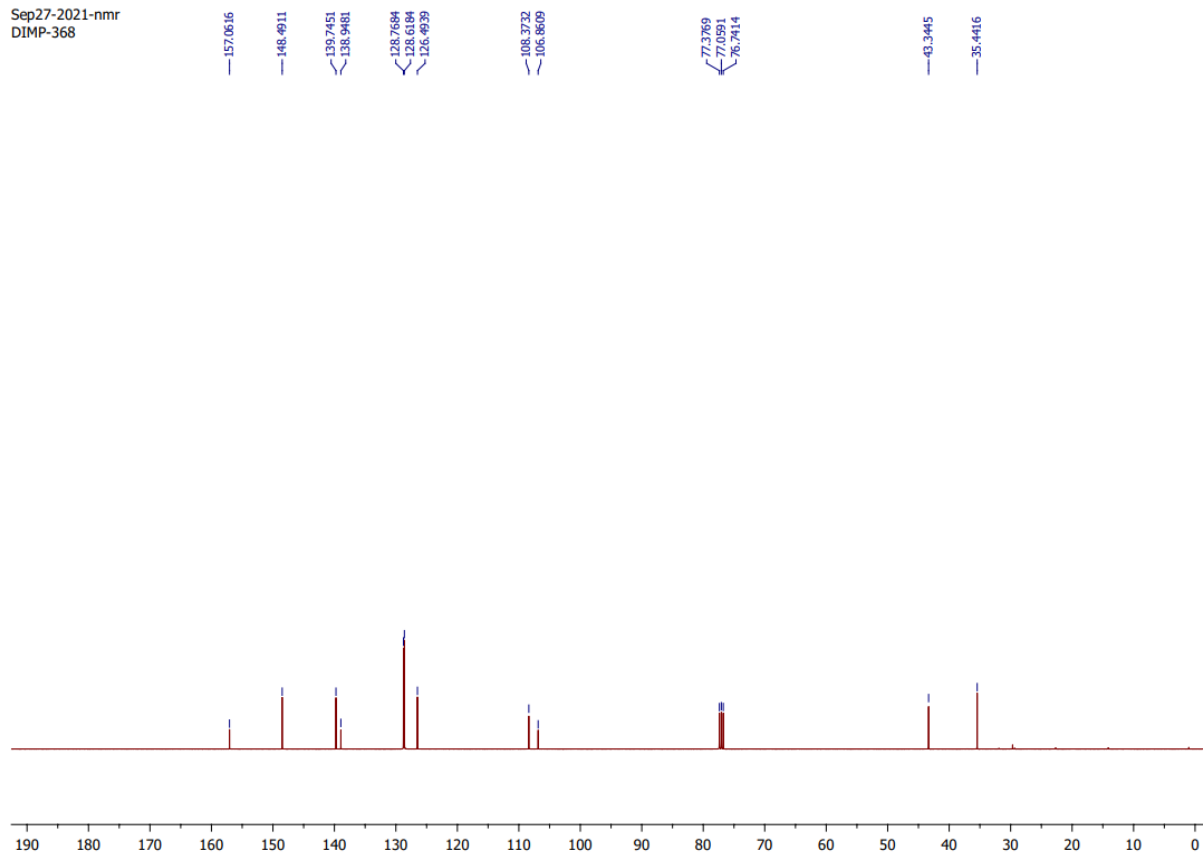

**HRMS**

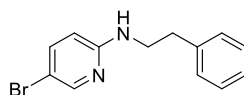

### 5-Bromo-N-phenethylpyridin-2-amine (4o)

#### Elemental Composition Report

Page 1

#### Single Mass Analysis

Tolerance = 10.0 PPM / DBE: min = -1.5, max = 50.0

Element prediction: Off

Number of isotope peaks used for i-FIT = 3

Monoisotopic Mass, Even Electron Ions

7 formula(e) evaluated with 1 results within limits (up to 3 closest results for each mass)

Elements Used:

C: 0-13 H: 0-200 N: 0-2 Br: 0-1

DIMP-368

QMI DIVISION, CSIR-IIIM JAMMU  
Xevo G2-XS QTOF YFC2015

22-Nov-2021

12:16:16

1: TOF MS ES+  
9.05e+005

221121\_14 29 (0.586) Cm (29:30)

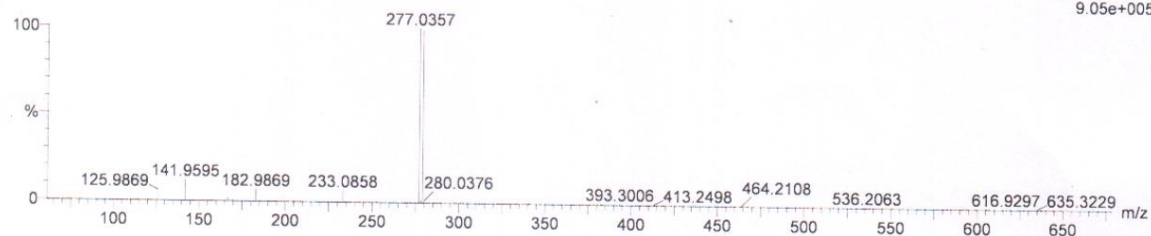

Minimum:

Maximum: 2.0 10.0 -1.5

| Mass     | Calc. Mass | mDa | PPM | DBE | i-FIT | Norm | Conf(%) | Formula       |
|----------|------------|-----|-----|-----|-------|------|---------|---------------|
| 277.0357 | 277.0340   | 1.7 | 6.1 | 7.5 | 37.2  | n/a  | n/a     | C13 H14 N2 Br |

#### <sup>1</sup>H NMR

(400 MHz, (CD<sub>3</sub>)<sub>2</sub>SO)

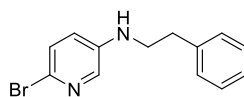

**6-Bromo-*N*-phenethylpyridin-3-amine (4p)**

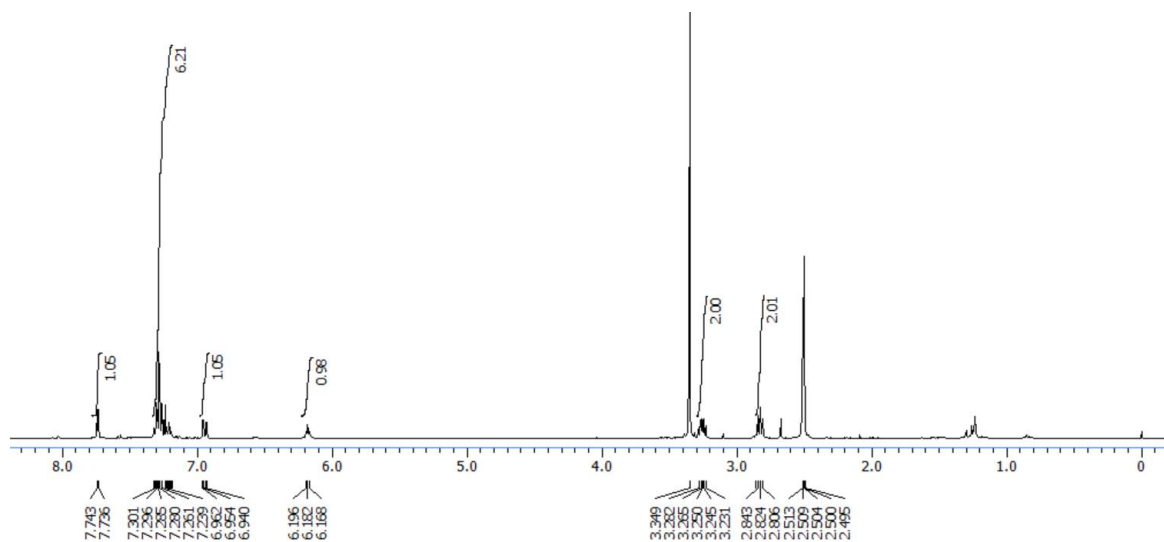

<sup>13</sup>C NMR

(100 MHz, (CD<sub>3</sub>)<sub>2</sub>SO)

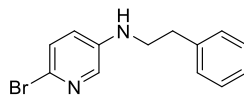

**6-Bromo-*N*-phenethylpyridin-3-amine (4p)**

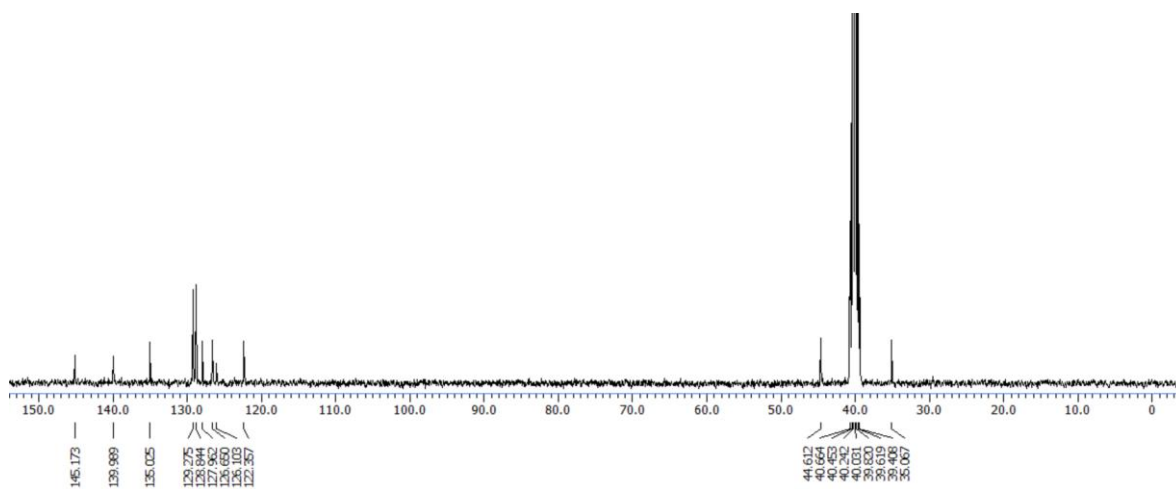

HRMS

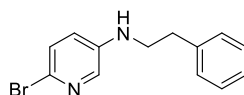

## 6-Bromo-N-phenethylpyridin-3-amine (4p)

### Elemental Composition Report

Page 1

#### Single Mass Analysis

Tolerance = 10.0 PPM / DBE: min = -1.5, max = 50.0

Element prediction: Off

Number of isotope peaks used for i-FIT = 3

Monoisotopic Mass, Even Electron Ions

7 formula(e) evaluated with 1 results within limits (up to 3 closest results for each mass)

Elements Used:

C: 0-13 H: 0-200 N: 0-2 Br: 0-1

DIMP-362

QMI DIVISION, CSIR-IIIM JAMMU  
Xevo G2-XS QTOF YFC2015

221121\_08 24 (0.482) Cm (24)

22-Nov-2021  
12:00:42  
1: TOF MS ES+  
4.51e+005

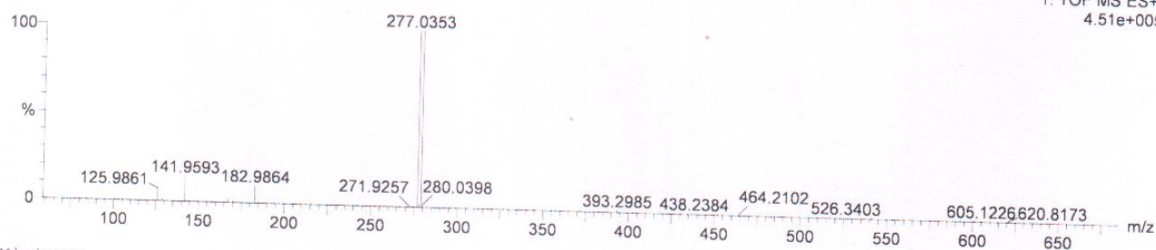

Minimum:

Maximum:

|          |            |     |     |     |       |      |         |               |
|----------|------------|-----|-----|-----|-------|------|---------|---------------|
| Mass     | Calc. Mass | mDa | PPM | DBE | i-FIT | Norm | Conf(%) | Formula       |
| 277.0353 | 277.0340   | 1.3 | 4.7 | 7.5 | 34.9  | n/a  | n/a     | C13 H14 N2 Br |

## <sup>1</sup>H NMR



(400 MHz, (CD<sub>3</sub>)<sub>2</sub>SO)

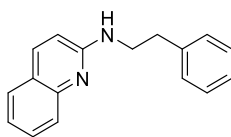

***N*-Phenethylquinolin-2-amine (4q)**

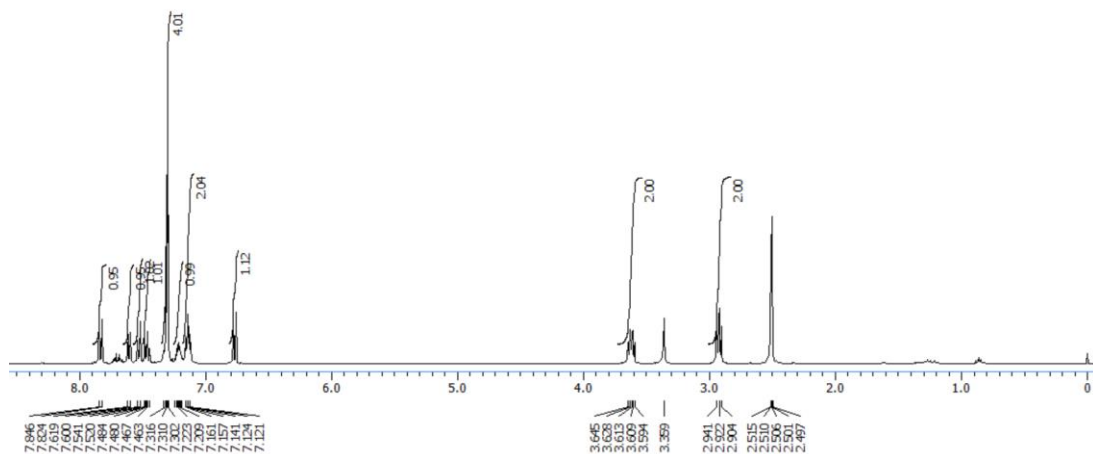

<sup>13</sup>C NMR

(100 MHz, (CD<sub>3</sub>)<sub>2</sub>SO)

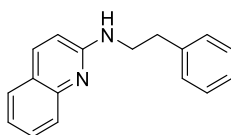

***N*-Phenethylquinolin-2-amine (4q)**

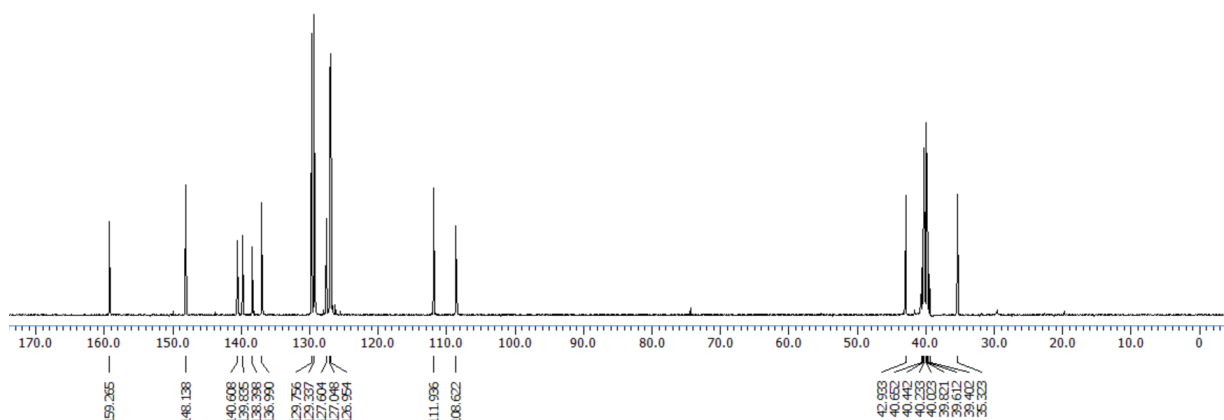

**HRMS**

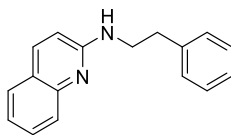

## N-Phenethylquinolin-2-amine (4q)

### Elemental Composition Report

Page 1

#### Single Mass Analysis

Tolerance = 10.0 PPM / DBE: min = -1.5, max = 50.0

Element prediction: Off

Number of isotope peaks used for i-FIT = 3

Monoisotopic Mass, Even Electron Ions

6 formula(e) evaluated with 1 results within limits (up to 3 closest results for each mass)

Elements Used:

C: 0-17 H: 0-200 N: 0-2

DIMP-315

QMI DIVISION, CSIR-IIIM JAMMU  
Xevo G2-XS QTOF YFC2015

22-Nov-2021

11:58:08

1: TOF MS ES+

5.51e+005

221121\_07 25 (0.519) Cm (25)

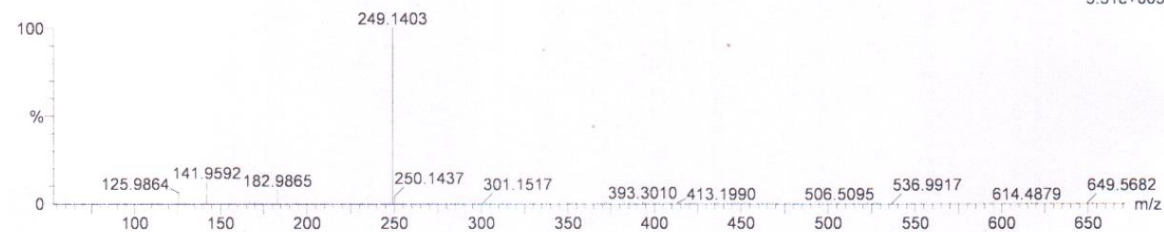

Minimum: -1.5  
Maximum: 2.0 10.0 50.0

| Mass     | Calc. Mass | mDa | PPM | DBE  | i-FIT | Norm | Conf(%) | Formula    |
|----------|------------|-----|-----|------|-------|------|---------|------------|
| 249.1403 | 249.1392   | 1.1 | 4.4 | 10.5 | 36.4  | n/a  | n/a     | C17 H17 N2 |

## <sup>1</sup>H NMR

(400 MHz, (CD<sub>3</sub>)<sub>2</sub>SO)

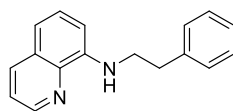

***N*-Phenethylquinolin-8-amine (4r)**

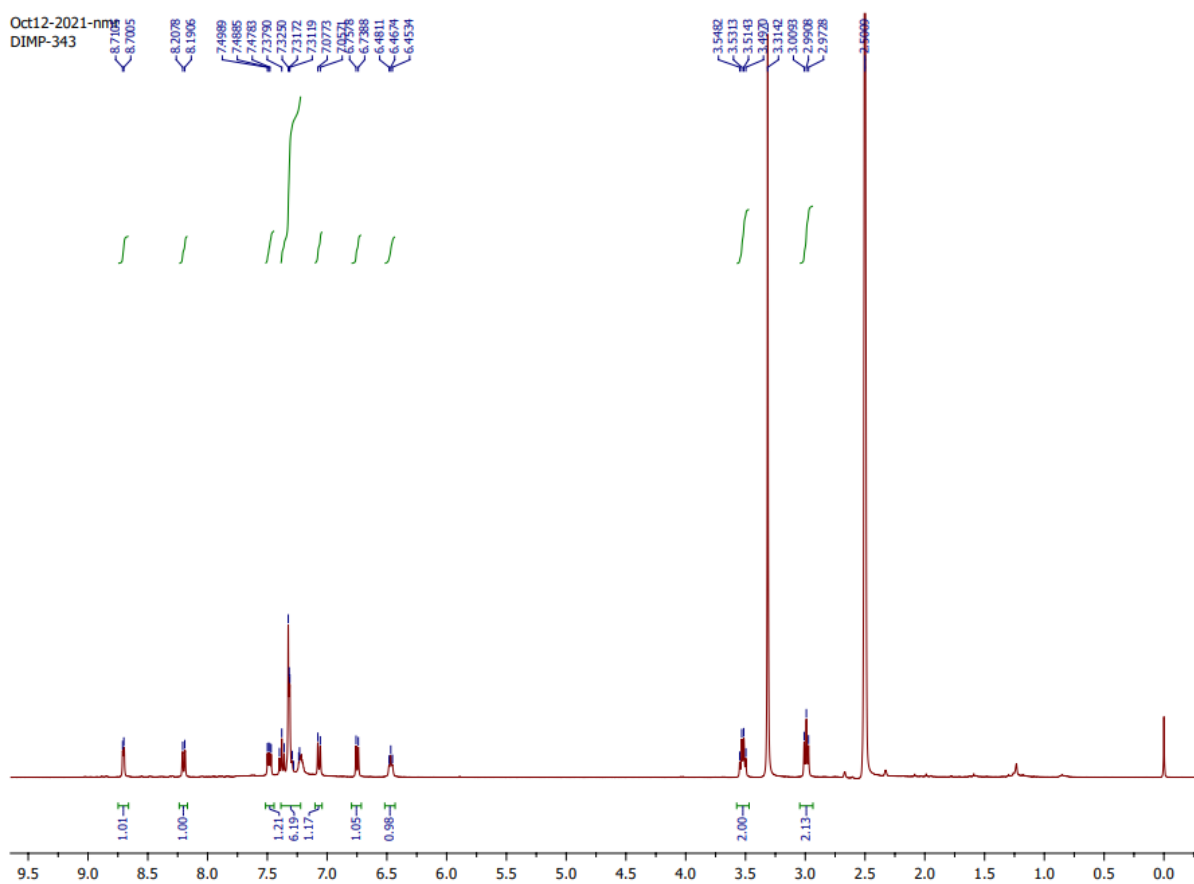

<sup>13</sup>C NMR

(100 MHz, (CD<sub>3</sub>)<sub>2</sub>SO)

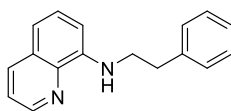

***N*-Phenethylquinolin-8-amine (4r)**

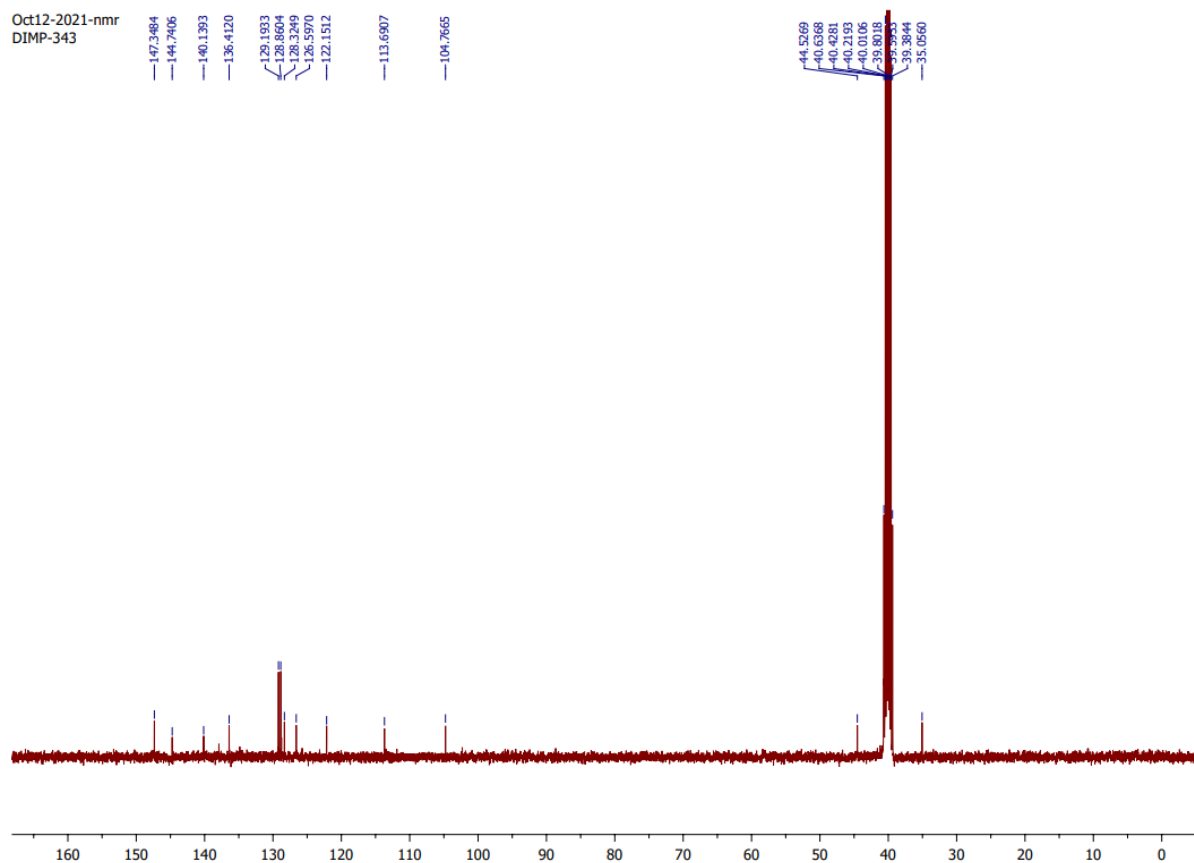

**HRMS**

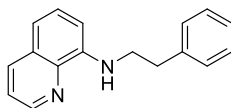

## N-Phenethylquinolin-8-amine (4r)

### Elemental Composition Report

Page 1

#### Single Mass Analysis

Tolerance = 10.0 PPM / DBE: min = -1.5, max = 50.0

Element prediction: Off

Number of isotope peaks used for i-FIT = 3

Monoisotopic Mass, Even Electron Ions

6 formula(e) evaluated with 1 results within limits (up to 3 closest results for each mass)

Elements Used:

C: 0-17 H: 0-200 N: 0-2

DIMP-343

QMI DIVISION, CSIR-IIIM JAMMU  
Xevo G2-XS QTOF YFC2015

22-Nov-2021

12:03:16

1: TOF MS ES+

8.00e+005

221121\_09 14 (0.293) Cm (14:15)

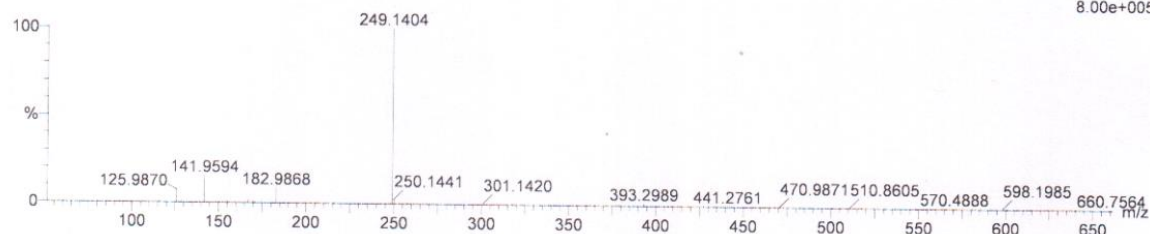

Minimum: -1.5  
Maximum: 2.0 10.0 50.0

| Mass     | Calc. Mass | mDa | PPM | DBE  | i-FIT | Norm | Conf(%) | Formula    |
|----------|------------|-----|-----|------|-------|------|---------|------------|
| 249.1404 | 249.1392   | 1.2 | 4.8 | 10.5 | 42.0  | n/a  | n/a     | C17 H17 N2 |

### <sup>1</sup>H NMR

(400 MHz, (CD<sub>3</sub>)<sub>2</sub>SO)

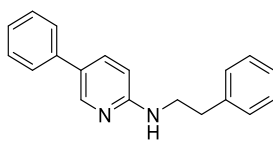

***N*-Phenethyl-5-phenylpyridin-2-amine (4s)**

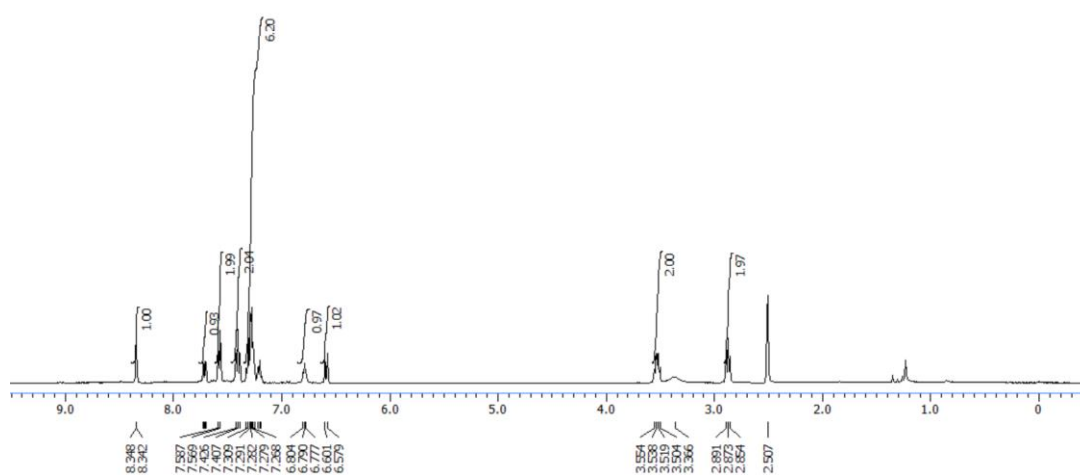

<sup>13</sup>C NMR

(100 MHz, (CD<sub>3</sub>)<sub>2</sub>SO)

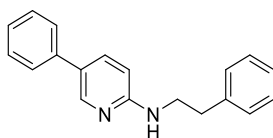

***N*-Phenethyl-5-phenylpyridin-2-amine (4s)**

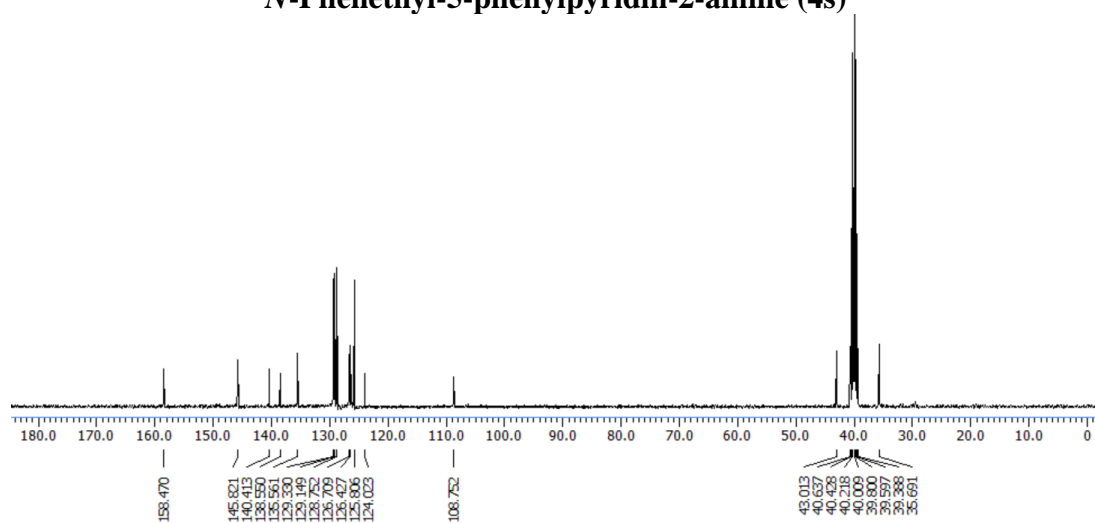

HRMS

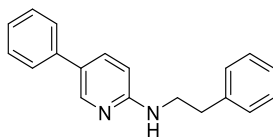

***N*-Phenethyl-5-phenylpyridin-2-amine (4s)**

Y:\Old Data\_2021\10122021\15

12/10/21 17:42:16

15 #120-222 RT: 0.49-0.90 AV: 103 SB: 610 0.91-3.00 , 0.01-0.41 NL: 1.85E8

T: FTMS + p ESI Full ms [50.00-2000.00]

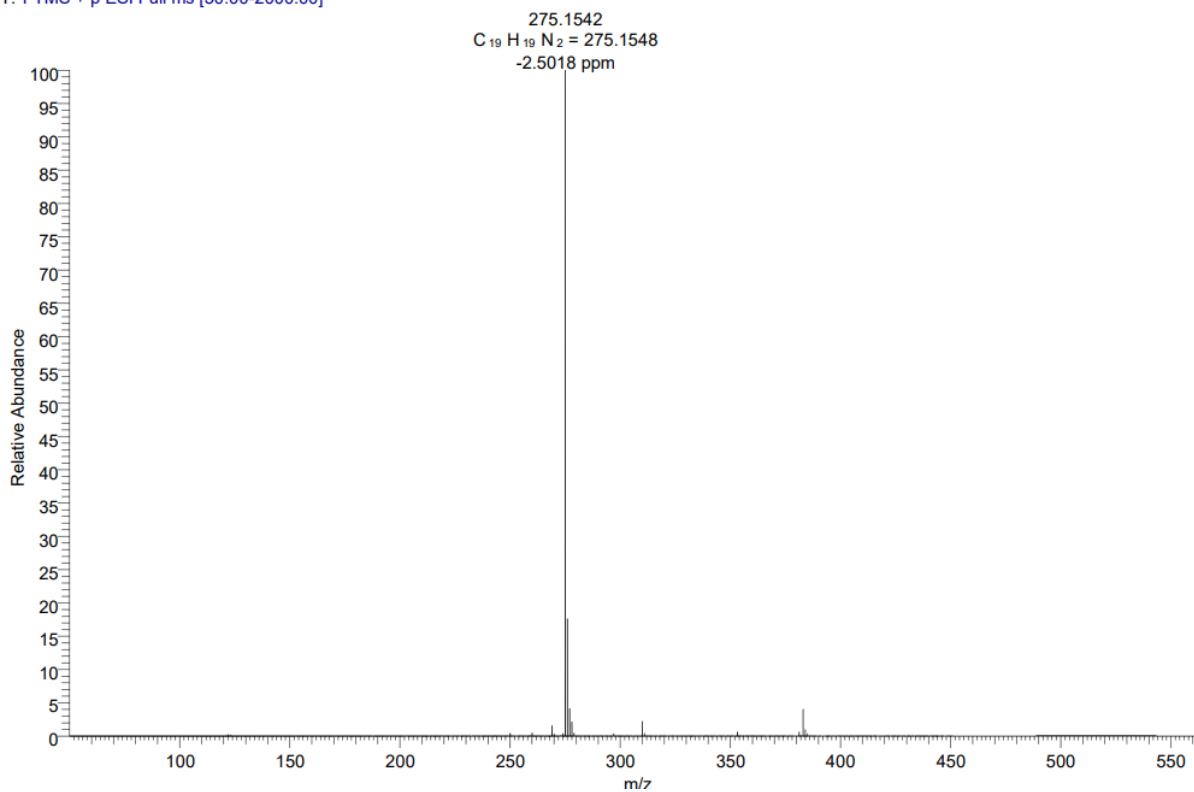

**<sup>1</sup>H NMR**

(400 MHz, CDCl<sub>3</sub>)

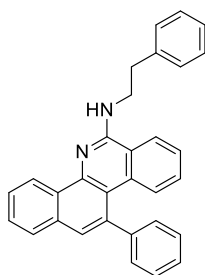

***N*-Phenethyl-11-phenylbenzo[*c*]phenanthridine-6-amine (4t)**

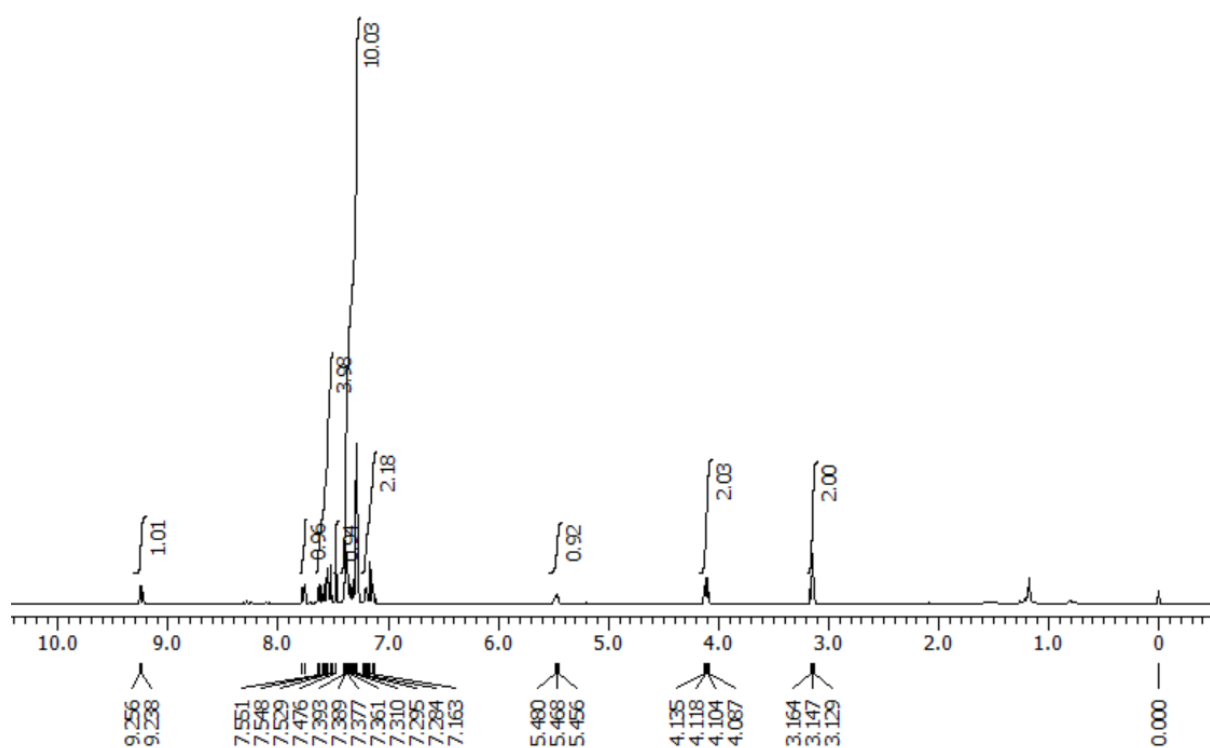

<sup>13</sup>C NMR



(100 MHz, CDCl<sub>3</sub>)



***N*-Phenethyl-11-phenylbenzo[*c*]phenanthridine-6-amine (4t)**

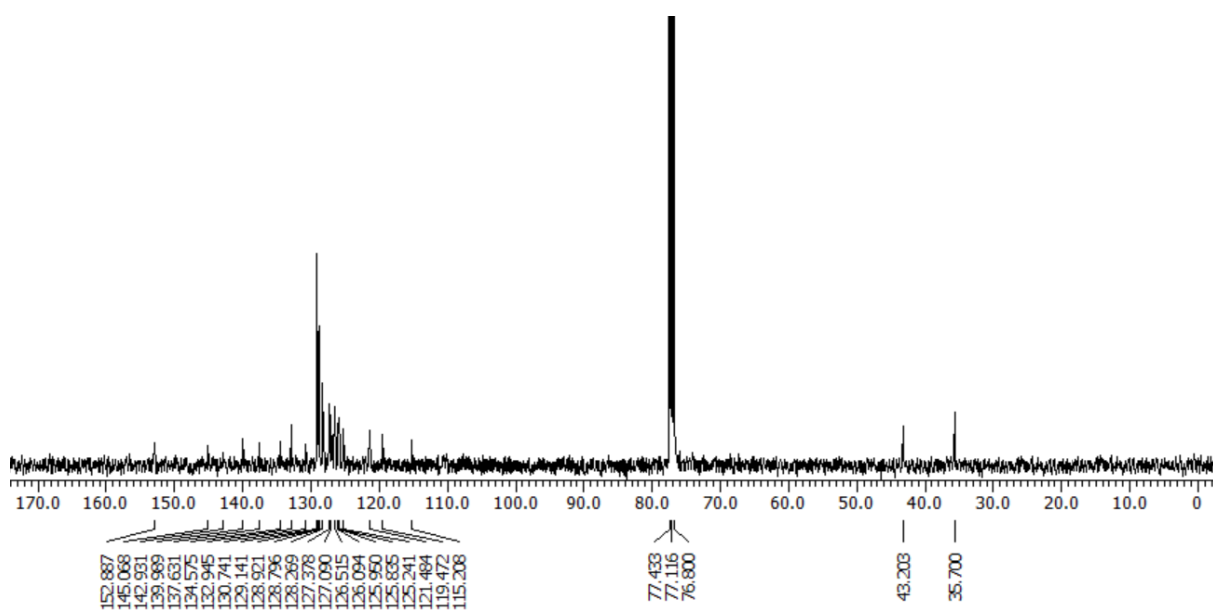

**HRMS**

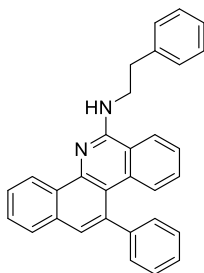

***N*-Phenethyl-11-phenylbenzo[*c*]phenanthridine-6-amine (4t)**

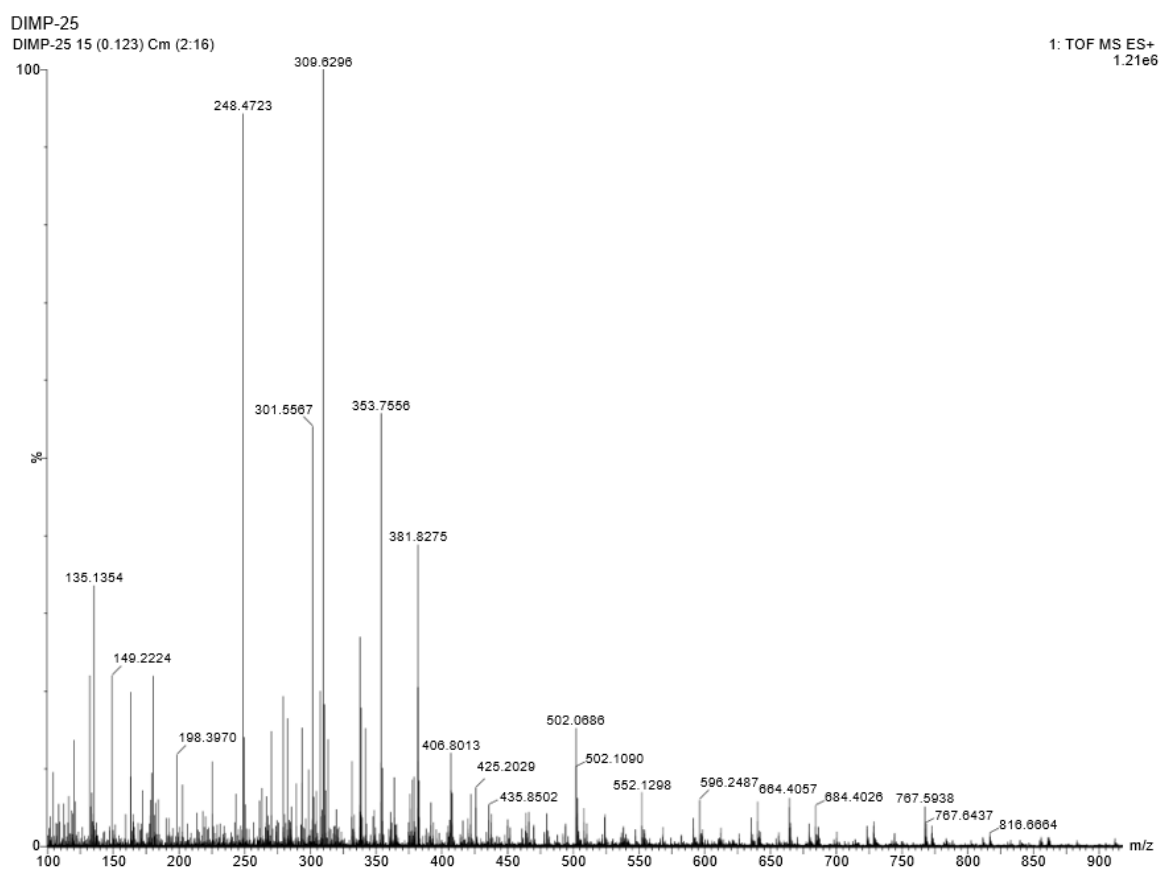

**<sup>1</sup>H NMR**

(400 MHz, CDCl<sub>3</sub>)

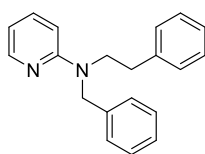

***N*-Benzyl-*N*-phenethylpyridin-2-amine (4u)**

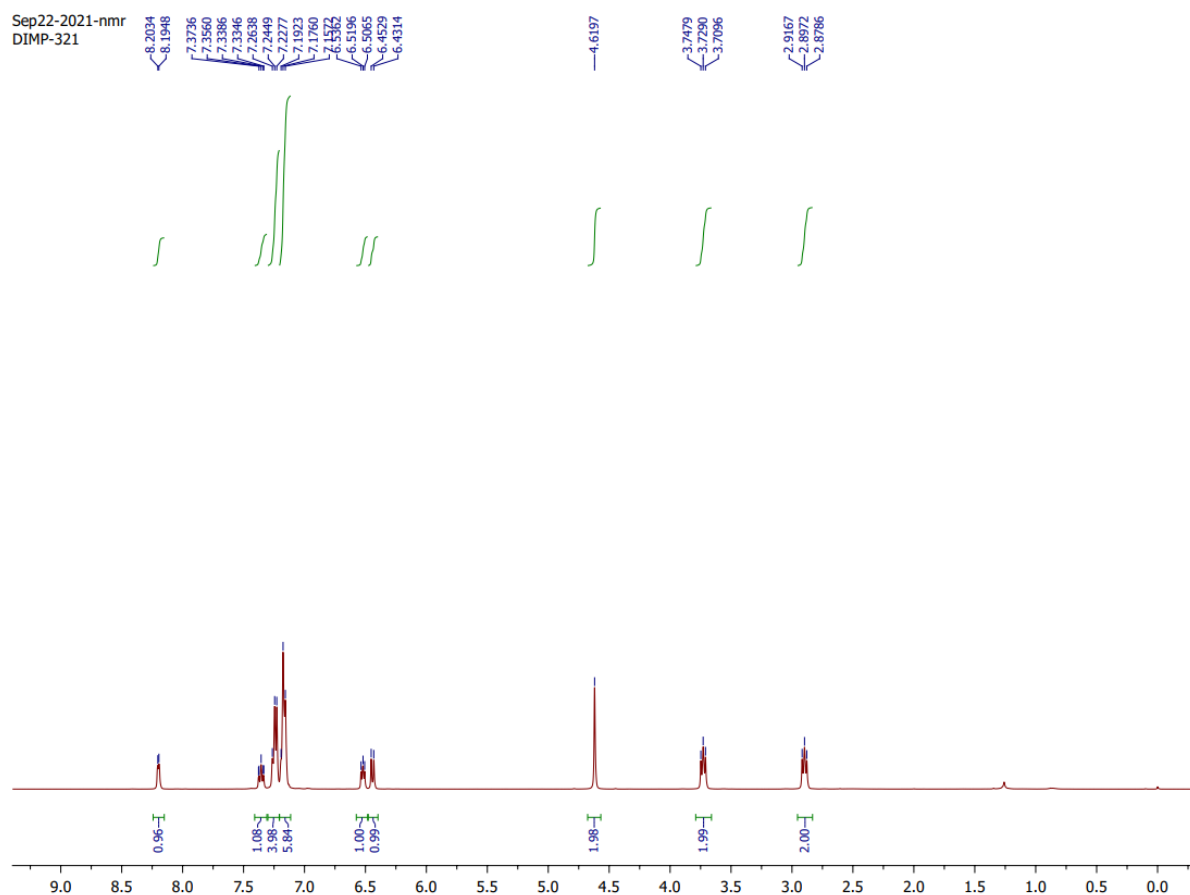

<sup>13</sup>C NMR

(100 MHz, CDCl<sub>3</sub>)

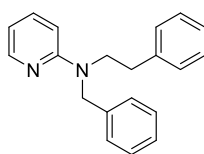

***N*-Benzyl-*N*-phenethylpyridin-2-amine (4u)**

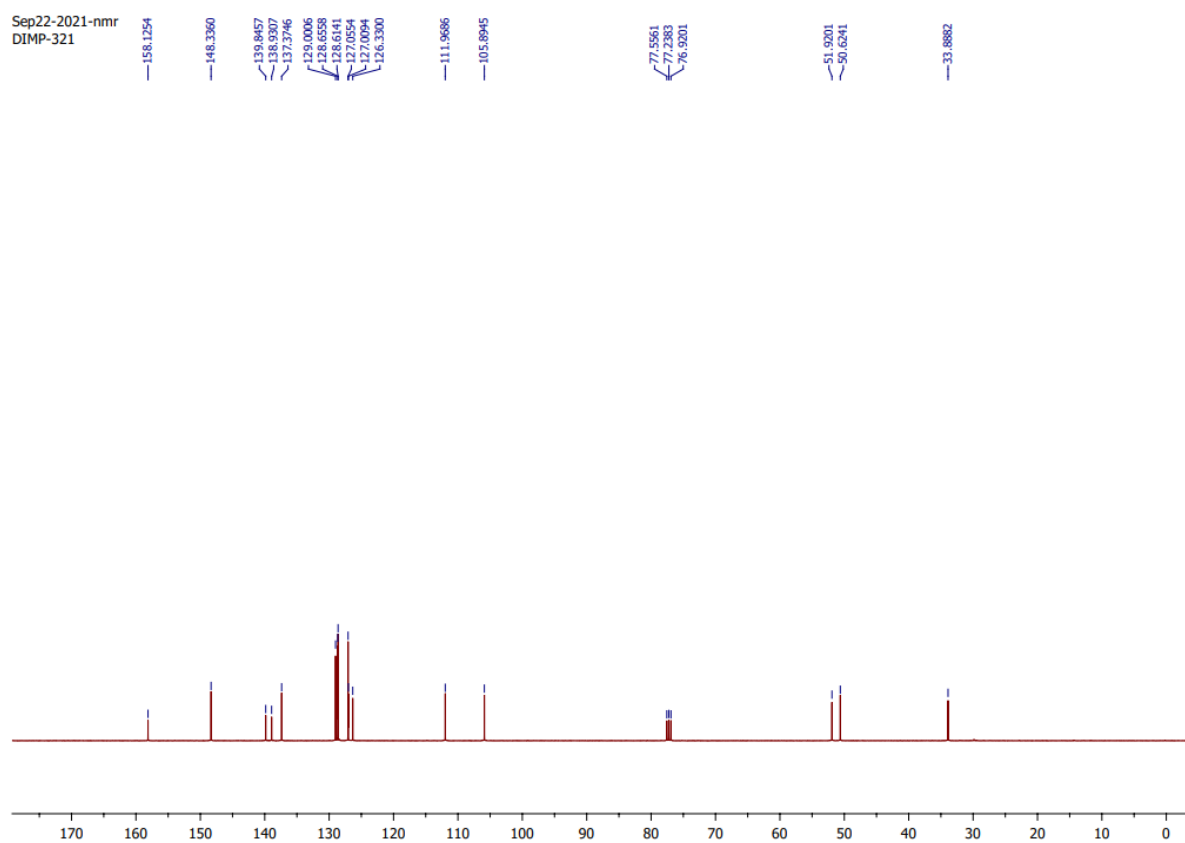

**HRMS**

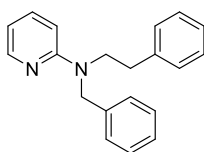

### N-Benzyl-N-phenethylpyridin-2-amine (4u)

#### Elemental Composition Report

Page 1

#### Single Mass Analysis

Tolerance = 10.0 PPM / DBE: min = -1.5, max = 50.0

Element prediction: Off

Number of isotope peaks used for i-FIT = 3

Monoisotopic Mass, Even Electron Ions

6 formula(e) evaluated with 1 results within limits (up to 3 closest results for each mass)

Elements Used:

C: 0-20 H: 0-200 N: 0-2

DIMP-321

QMI DIVISION, CSIR-IIIM JAMMU  
Xevo G2-XS QTOF YFC2015

22-Nov-2021

12:05:59

1: TOF MS ES+

9.77e+005

221121\_10 30 (0.603) Cm (30.31)

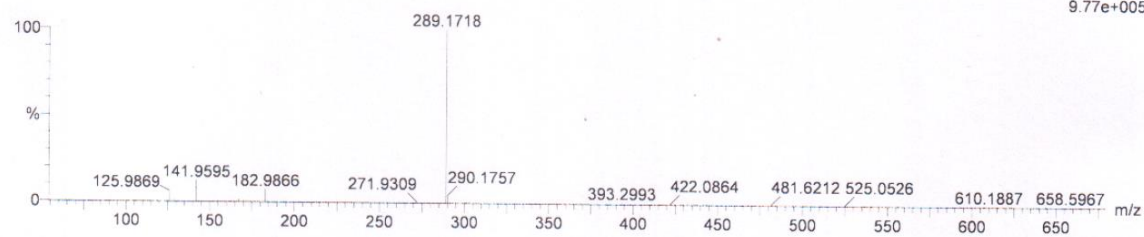

Minimum:

Maximum: 2.0 10.0 -1.5

| Mass     | Calc. Mass | mDa | PPM | DBE  | i-FIT | Norm | Conf(%) | Formula    |
|----------|------------|-----|-----|------|-------|------|---------|------------|
| 289.1718 | 289.1705   | 1.3 | 4.5 | 11.5 | 47.3  | n/a  | n/a     | C20 H21 N2 |

#### <sup>1</sup>H NMR

(400 MHz, (CD<sub>3</sub>)<sub>2</sub>SO)

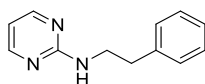

***N*-Phenethylpyrimidin-2-amine (6a)**

Jul07-2021-nmr  
DIMP-254 (II)

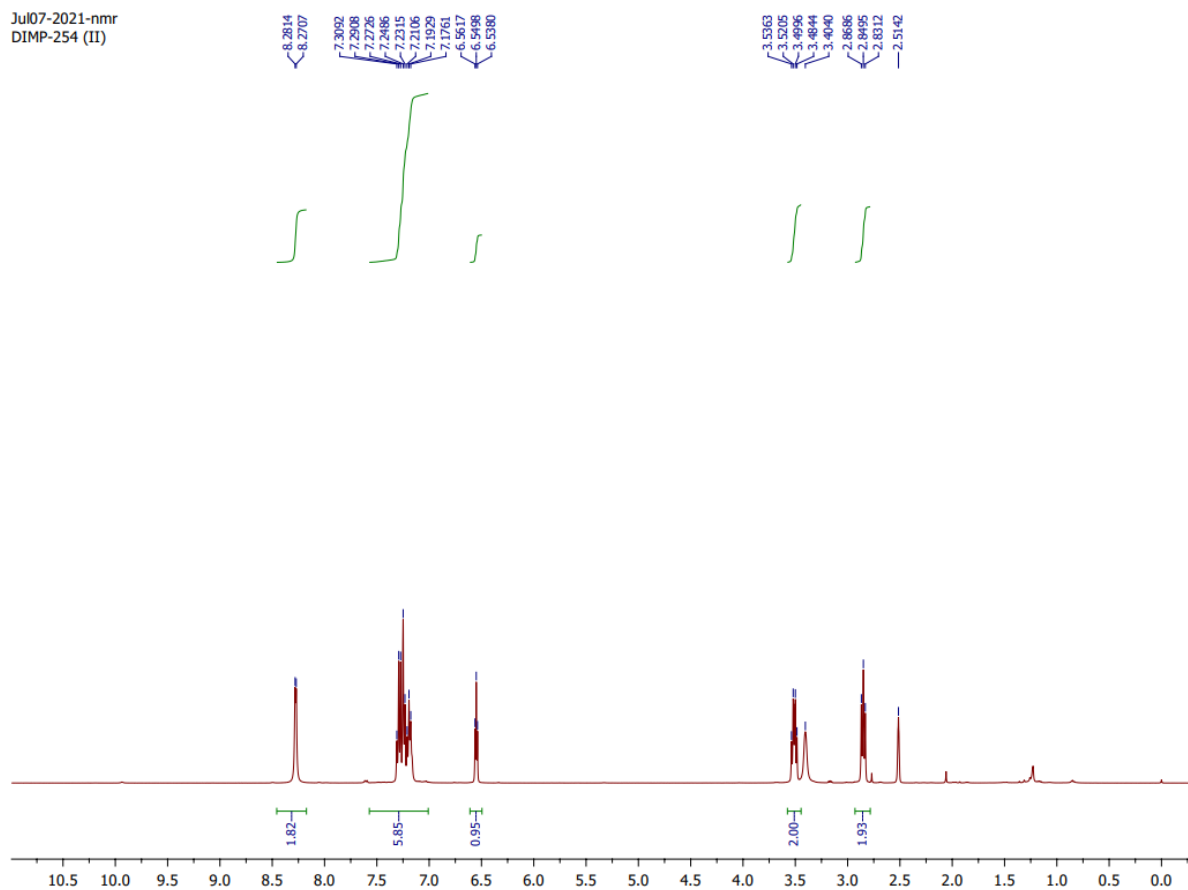

<sup>13</sup>C NMR

(100 MHz, (CD<sub>3</sub>)<sub>2</sub>SO)

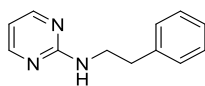

***N*-Phenethylpyrimidin-2-amine (6a)**

Jul07-2021-nmr  
DIMP-254 (II)

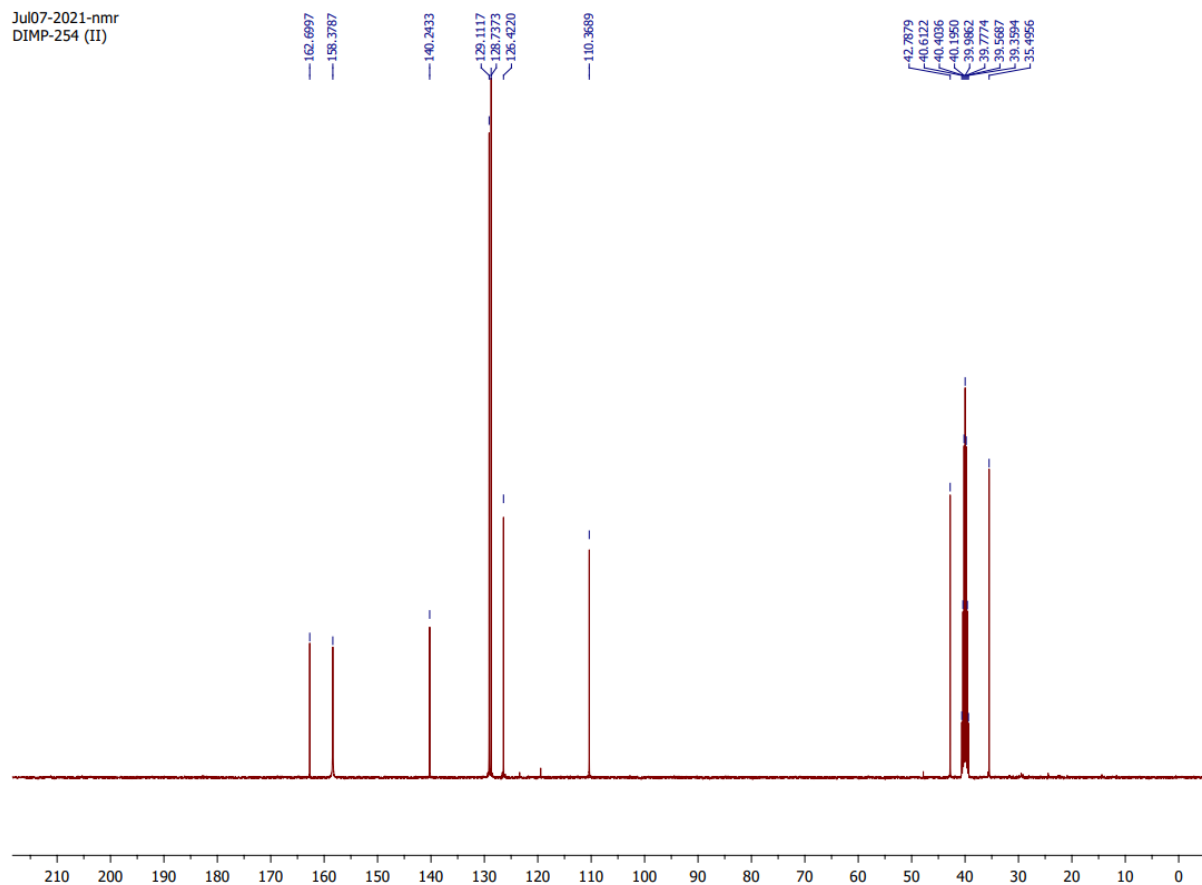

**HRMS**

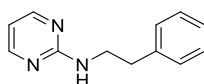

### N-Phenethylpyrimidin-2-amine (6a)

#### Elemental Composition Report

Page 1

##### Single Mass Analysis

Tolerance = 10.0 PPM / DBE: min = -1.5, max = 50.0

Element prediction: Off

Number of isotope peaks used for i-FIT = 3

Monoisotopic Mass, Even Electron Ions

85 formula(e) evaluated with 1 results within limits (up to 3 closest results for each mass)

Elements Used:

C: 0-24 H: 0-200 N: 0-4 O: 0-2 S: 0-1

DIMP-254

QMI DIVISION, CSIR-IIIM JAMMU  
Xevo G2-XS QTOF YFC2015

23-Nov-2021  
11:52:39  
1: TOF MS ES+  
9.85e+005

231121\_06 11 (0.242) Cm (11)

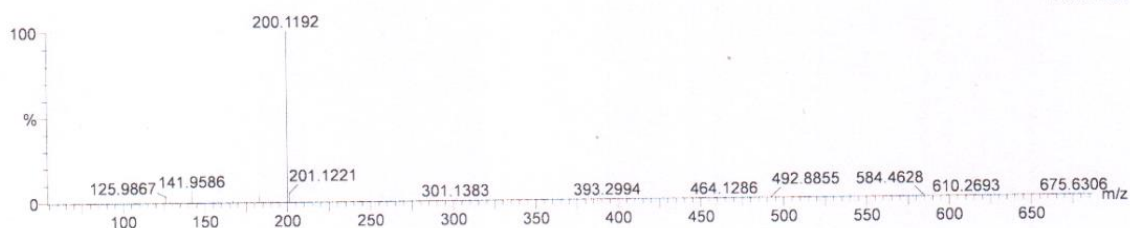

Minimum: -1.5  
Maximum: 2.0 10.0 50.0

| Mass     | Calc. Mass | mDa | PPM | DBE | i-FIT | Norm | Conf(%) | Formula    |
|----------|------------|-----|-----|-----|-------|------|---------|------------|
| 200.1192 | 200.1188   | 0.4 | 2.0 | 7.5 | 38.7  | n/a  | n/a     | C12 H14 N3 |

### <sup>1</sup>H NMR



(400 MHz, (CD<sub>3</sub>)<sub>2</sub>SO)

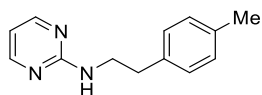

***N*-(4-Methylphenethyl)pyrimidin-2-amine (6b)**

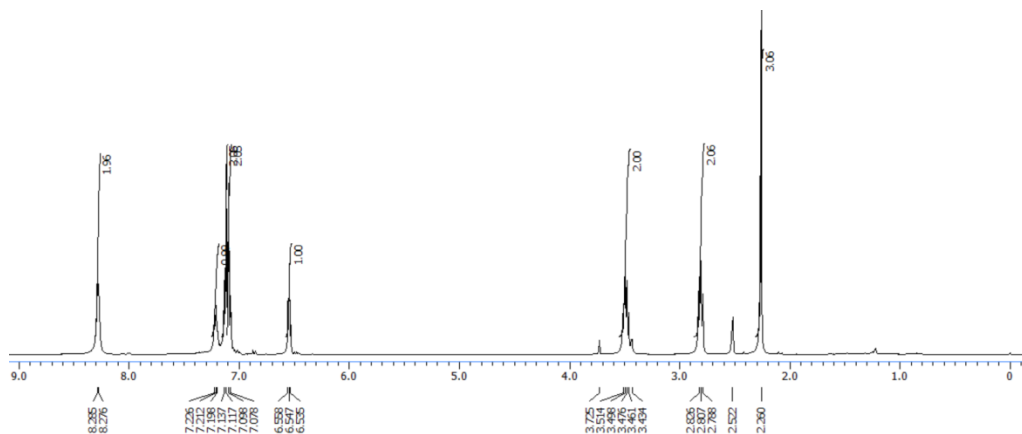

<sup>13</sup>C NMR

(100 MHz, (CD<sub>3</sub>)<sub>2</sub>SO)

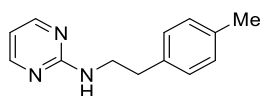

***N*-(4-Methylphenethyl)pyrimidin-2-amine (6b)**

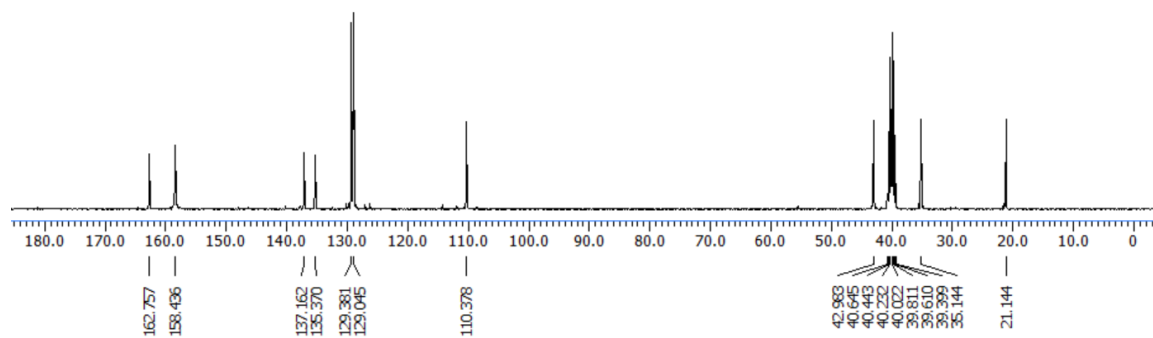

**HRMS**

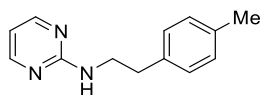

## N-(4-Methylphenethyl)pyrimidin-2-amine (6b)

### Elemental Composition Report

Page 1

#### Single Mass Analysis

Tolerance = 10.0 PPM / DBE: min = -1.5, max = 50.0

Element prediction: Off

Number of isotope peaks used for i-FIT = 3

Monoisotopic Mass, Even Electron Ions

89 formula(e) evaluated with 1 results within limits (up to 3 closest results for each mass)

Elements Used:

C: 0-24 H: 0-200 N: 0-4 O: 0-2 S: 0-1

DIMP-265

QMI DIVISION, CSIR-IIIM JAMMU  
Xevo G2-XS QTOF YFC2015

23-Nov-2021

11:57:57

1: TOF MS ES+

1.39e+006

231121\_08 22 (0.448) Cm (22:23)

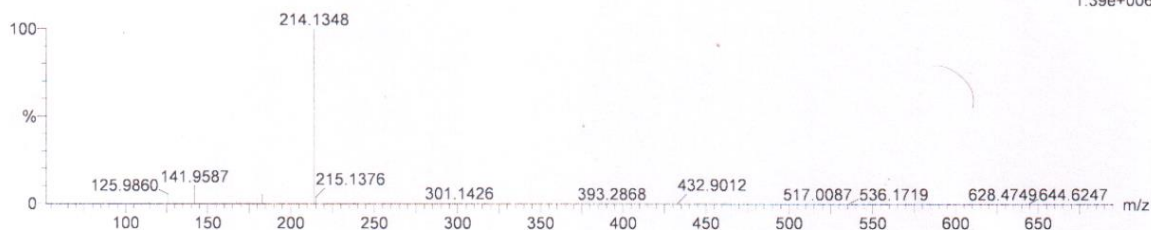

Minimum: -1.5  
Maximum: 2.0 10.0 50.0

| Mass     | Calc. Mass | mDa | PPM | DBE | i-FIT | Norm | Conf(%) | Formula    |
|----------|------------|-----|-----|-----|-------|------|---------|------------|
| 214.1348 | 214.1344   | 0.4 | 1.9 | 7.5 | 42.7  | n/a  | n/a     | C13 H16 N3 |

# <sup>1</sup>H NMR

(400 MHz, (CD<sub>3</sub>)<sub>2</sub>SO)

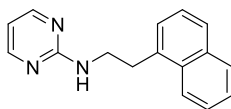

*N*-(2-(Naphthalen-1-yl)ethyl)pyrimidin-2-amine (6c)

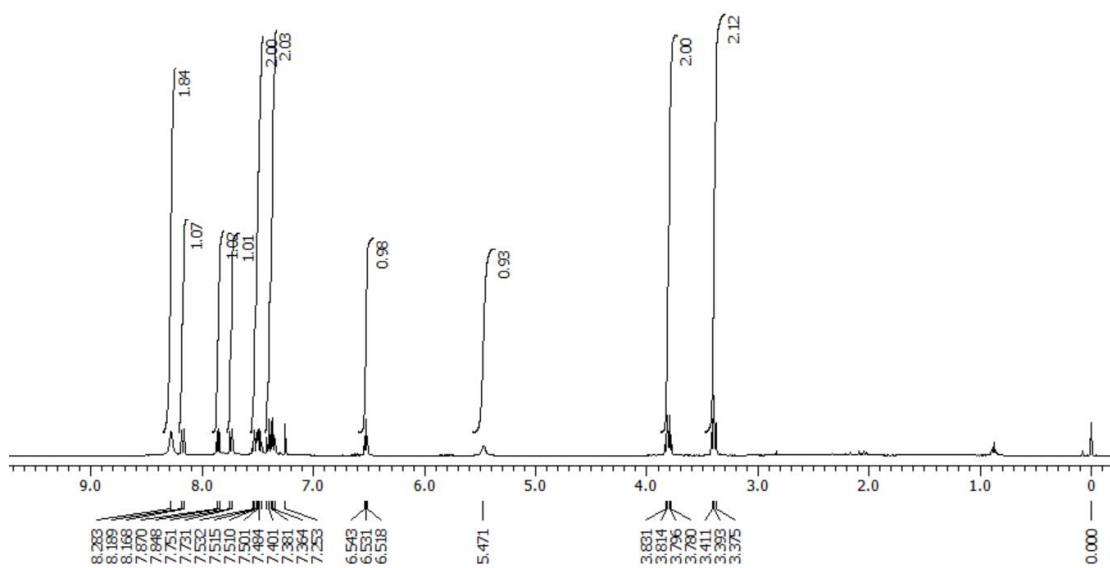

# <sup>13</sup>C NMR

(100 MHz, (CD<sub>3</sub>)<sub>2</sub>SO)

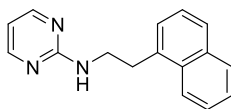

*N*-(2-(Naphthalen-1-yl)ethyl)pyrimidin-2-amine (6c)

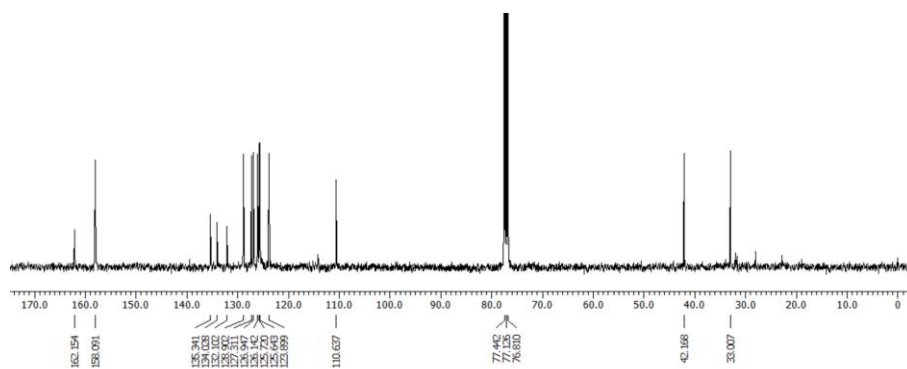

# HRMS

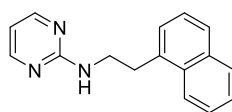

## N-(2-(Naphthalen-1-yl)ethyl)pyrimidin-2-amine (6c)

### Elemental Composition Report

Page 1

#### Single Mass Analysis

Tolerance = 10.0 PPM / DBE: min = -1.5, max = 50.0

Element prediction: Off

Number of isotope peaks used for i-FIT = 3

Monoisotopic Mass, Even Electron Ions

102 formula(e) evaluated with 1 results within limits (up to 3 closest results for each mass)

Elements Used:

C: 0-24 H: 0-200 N: 0-4 O: 0-2 S: 0-1

DIMP-375

QMI DIVISION, CSIR-IIIM JAMMU  
Xevo G2-XS QTOF YFC2015

23-Nov-2021

12:00:32

1: TOF MS ES+

4.11e+005

231121\_09 9 (0.208) Cm (9)

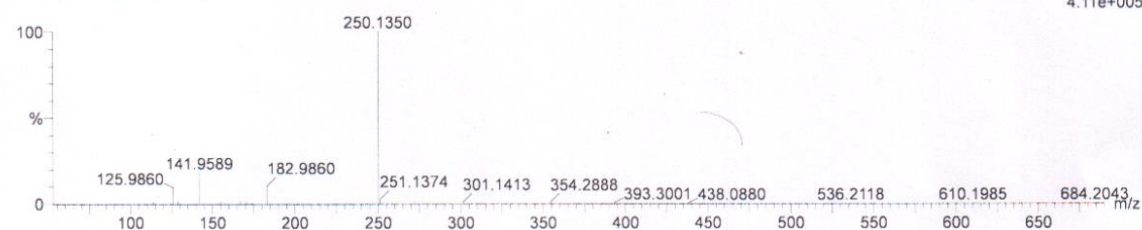

Minimum: -1.5  
Maximum: 2.0 10.0 50.0

| Mass     | Calc. Mass | mDa | PPM | DBE  | i-FIT | Norm | Conf(%) | Formula    |
|----------|------------|-----|-----|------|-------|------|---------|------------|
| 250.1350 | 250.1344   | 0.6 | 2.4 | 10.5 | 43.1  | n/a  | n/a     | C16 H16 N3 |

**<sup>1</sup>H NMR**  
**(400 MHz, (CD<sub>3</sub>)<sub>2</sub>SO)**

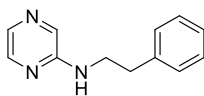

***N*-Phenethylpyrazin-2-amine (7a)**

Sep14-2021-nmr  
DIMP-337

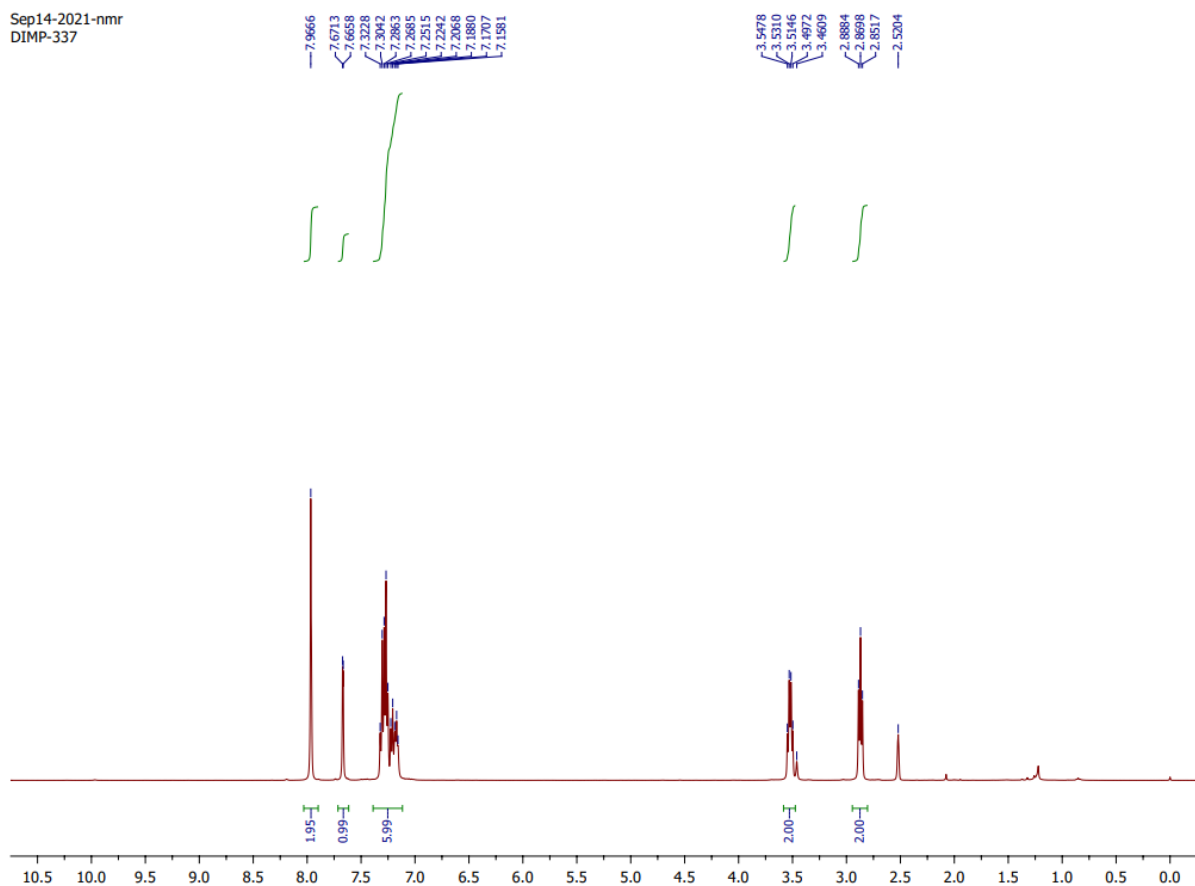

**$^{13}\text{C}$  NMR**  
**(100 MHz,  $(\text{CD}_3)_2\text{SO}$ )**



***N*-Phenethylpyrazin-2-amine (7a)**

Sep14-2021-nmr  
DIMP-337

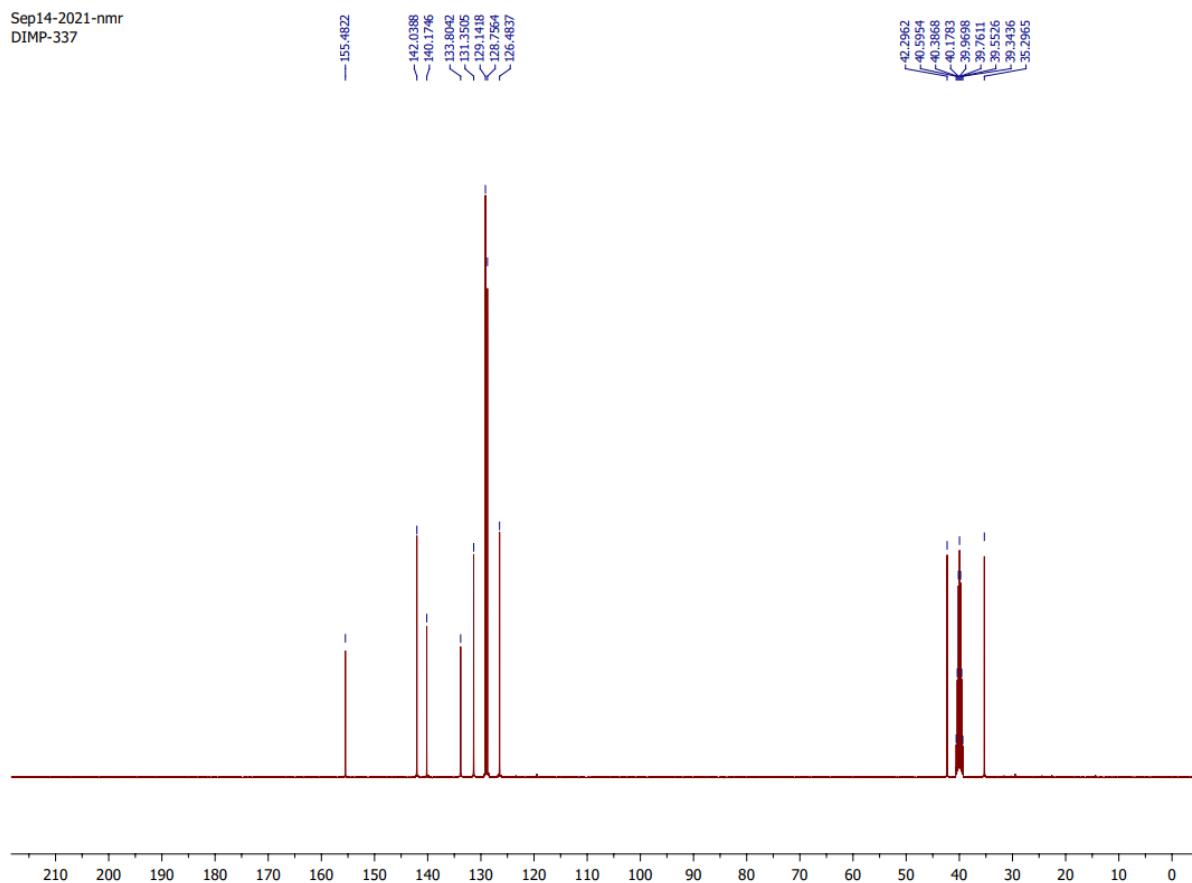

## HRMS

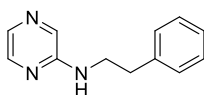

### N-Phenethylpyrazin-2-amine (7a)

#### Elemental Composition Report

Page 1

#### Single Mass Analysis

Tolerance = 10.0 PPM / DBE: min = -1.5, max = 50.0

Element prediction: Off

Number of isotope peaks used for i-FIT = 3

Monoisotopic Mass, Even Electron Ions

85 formula(e) evaluated with 1 results within limits (up to 3 closest results for each mass)

Elements Used:

C: 0-24 H: 0-200 N: 0-4 O: 0-2 S: 0-1

DIMP-337

QMI DIVISION, CSIR-IIIM JAMMU  
Xevo G2-XS QTOF YFC2015

23-Nov-2021

11:50:05

1: TOF MS ES+

1.01e+006

231121\_05 22 (0.448) Cm (22:23)

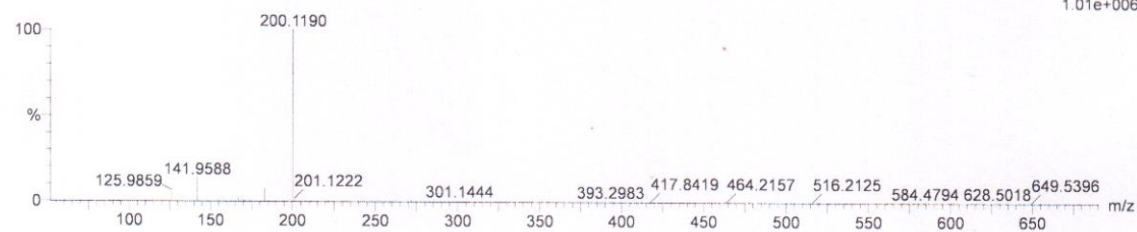

Minimum: -1.5  
Maximum: 2.0 10.0 50.0

| Mass     | Calc. Mass | mDa | PPM | DBE | i-FIT | Norm | Conf(%) | Formula    |
|----------|------------|-----|-----|-----|-------|------|---------|------------|
| 200.1190 | 200.1188   | 0.2 | 1.0 | 7.5 | 45.9  | n/a  | n/a     | C12 H14 N3 |

**<sup>1</sup>H NMR**  
**(400 MHz, (CDCl<sub>3</sub>))**

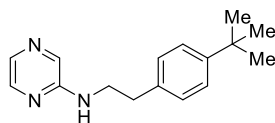

***N*-(4-(*tert*-Butyl)phenethyl)pyrazin-2-amine (7b)**

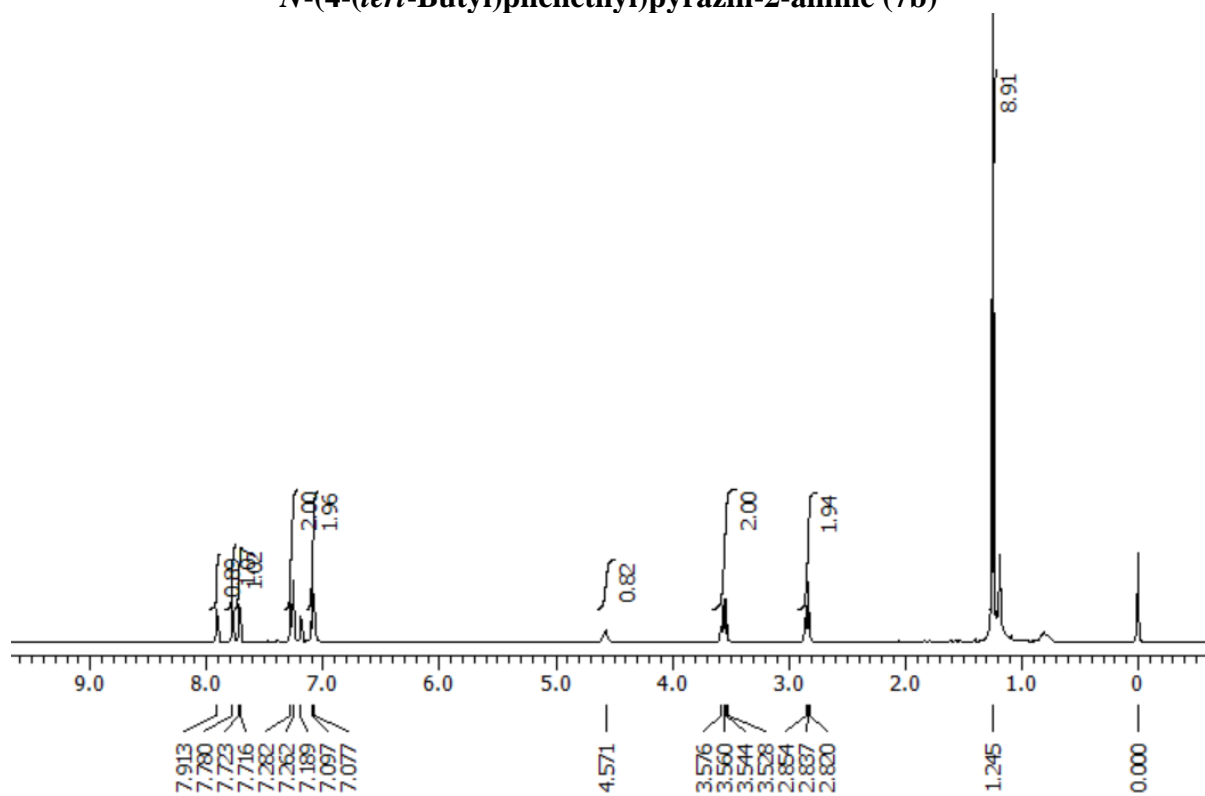



**$^{13}\text{C}$  NMR**

**(100 MHz,  $(\text{CD}_3)_2\text{SO}$ )**



***N*-(4-(*tert*-Butyl)phenethyl)pyrazin-2-amine (7b)**

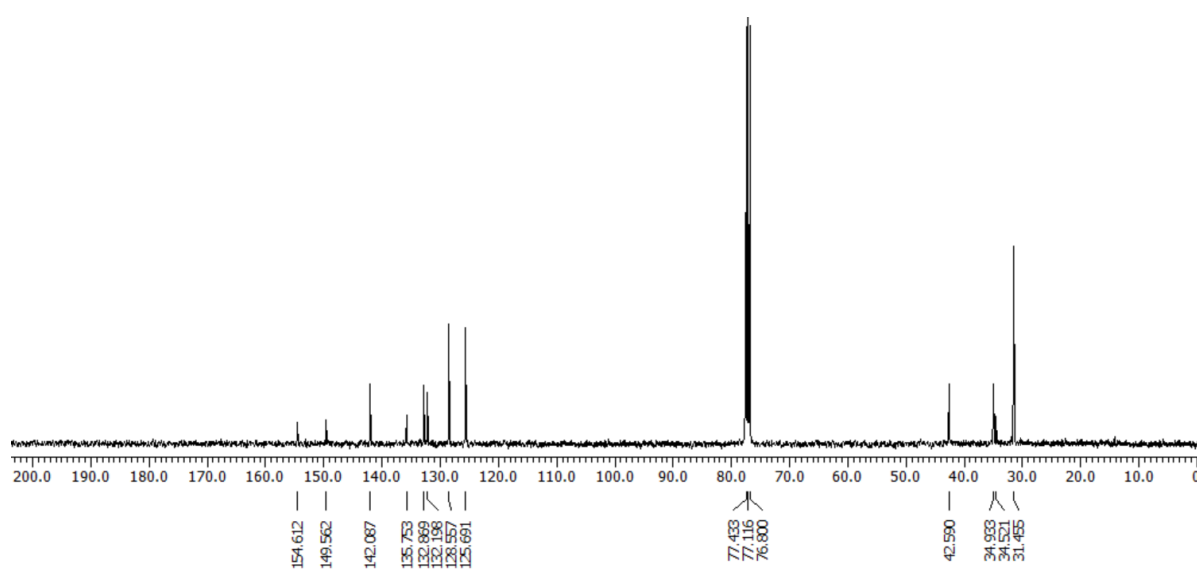

## HRMS

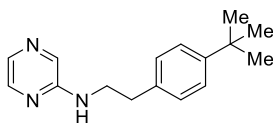

***N*-(4-(*tert*-Butyl)phenethyl)pyrazin-2-amine (7b)**

### Elemental Composition Report

Page 1

#### Single Mass Analysis

Tolerance = 10.0 PPM / DBE: min = -1.5, max = 50.0

Element prediction: Off

Number of isotope peaks used for i-FIT = 3

Monoisotopic Mass, Even Electron Ions

105 formula(e) evaluated with 1 results within limits (up to 3 closest results for each mass)

Elements Used:

C: 0-24 H: 0-200 N: 0-4 O: 0-2 S: 0-1

DIMP-376

QMI DIVISION, CSIR-IIIM JAMMU  
Xevo G2-XS QTOF YFC2015

23-Nov-2021

11:55:14

1: TOF MS ES+

8.99e+005

231121\_07 8 (0.172) Cm (8)

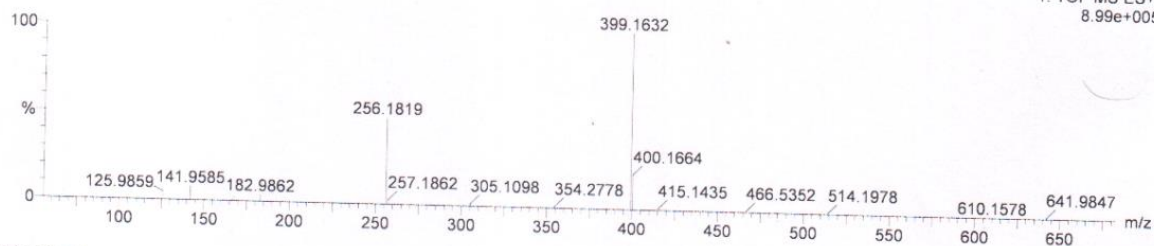

Minimum:

Maximum:

2.0 10.0 -1.5  
50.0

| Mass     | Calc. Mass | mDa | PPM | DBE | i-FIT | Norm | Conf(%) | Formula    |
|----------|------------|-----|-----|-----|-------|------|---------|------------|
| 256.1819 | 256.1814   | 0.5 | 2.0 | 7.5 | 34.2  | n/a  | n/a     | C16 H22 N3 |

**$^1\text{H}$  NMR**  
(400 MHz,  $\text{CDCl}_3$ )

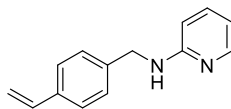

***N*-(4-Vinylbenzyl)pyridin-2-amine (8a)**

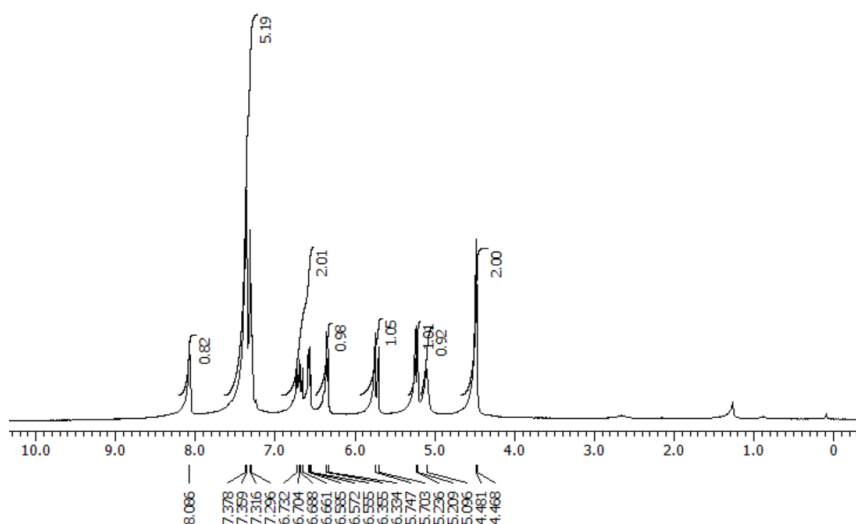

**$^{13}\text{C}$  NMR**  
(100 MHz,  $\text{CDCl}_3$ )

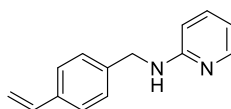

***N*-(4-Vinylbenzyl)pyridin-2-amine (8a)**

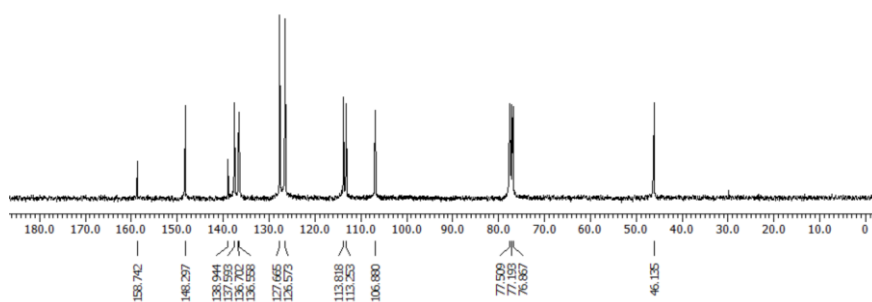

# HRMS

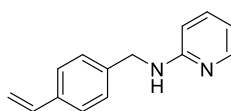

## *N*-(4-Vinylbenzyl)pyridin-2-amine (8a)

DIMP-274  
DIMP-274 8 (0.118) Cm (6:8)

1: TOF MS ES+  
1.07e6

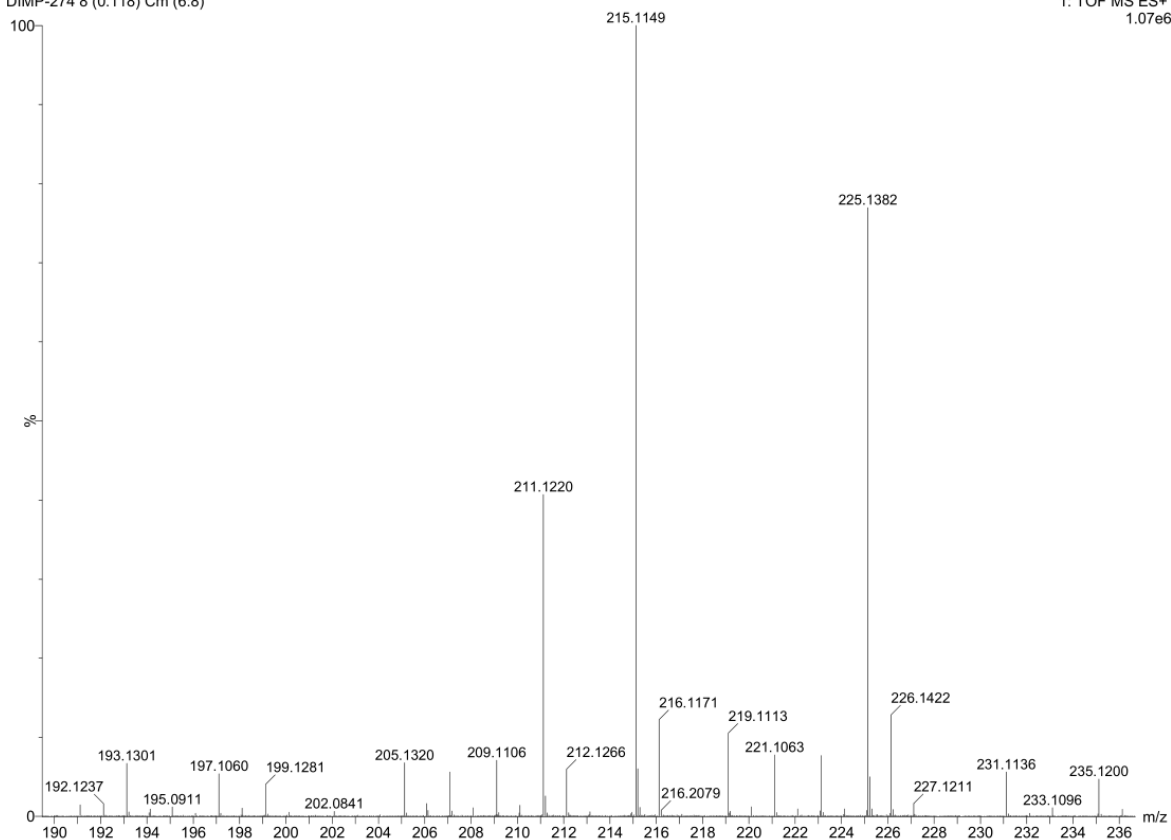

**$^1\text{H}$  NMR**  
(400 MHz,  $\text{CDCl}_3$ )

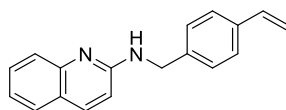

***N*-(4-Vinylbenzyl)quinolin-2-amine (8b)**

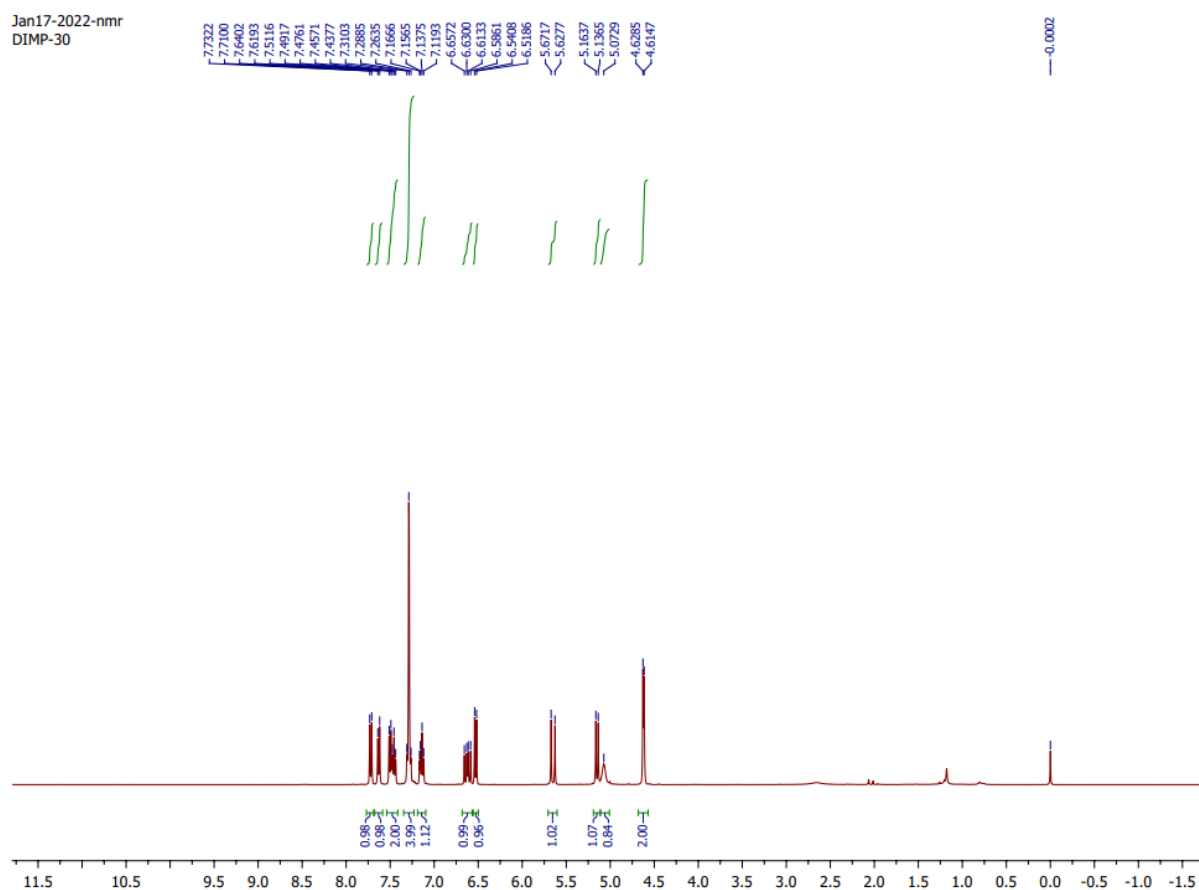

**$^{13}\text{C}$  NMR**  
**(100 MHz,  $\text{CDCl}_3$ )**



***N*-(4-Vinylbenzyl)quinolin-2-amine (8b)**

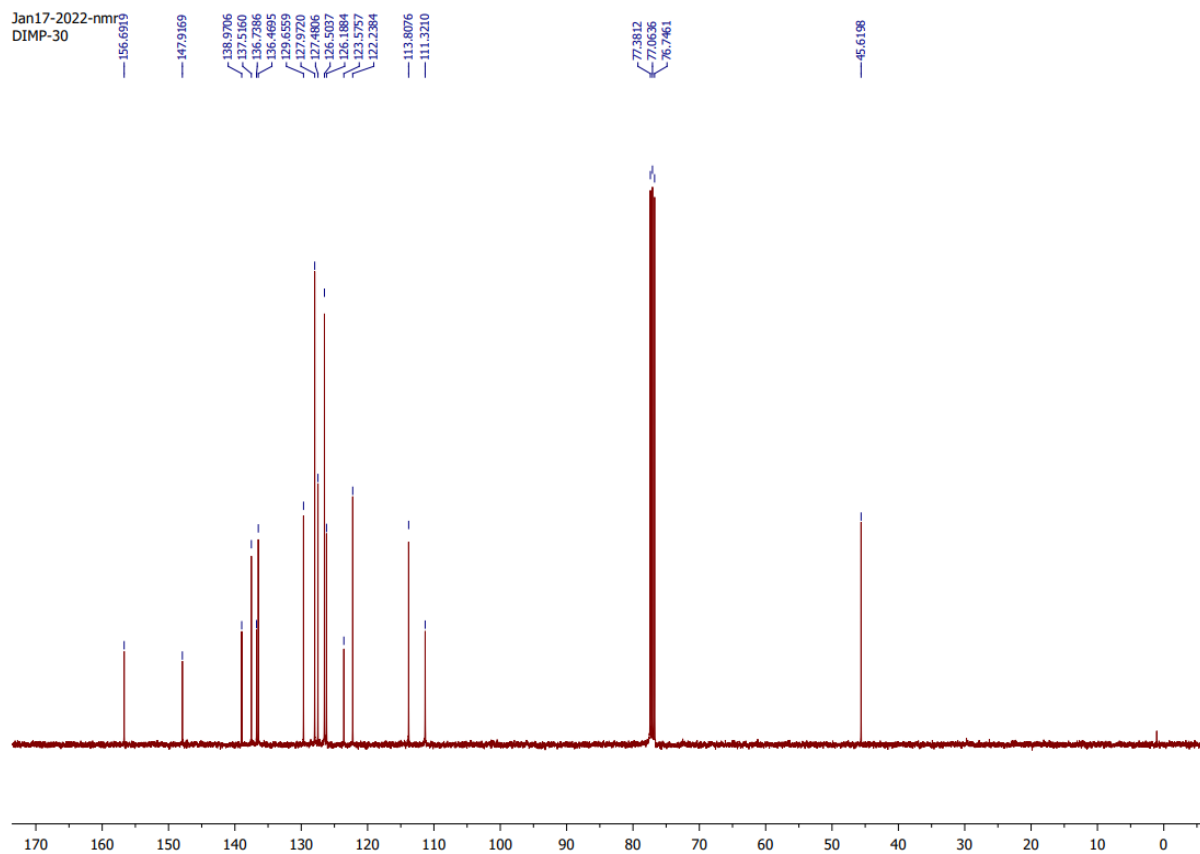

# HRMS

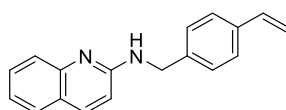

## *N*-(4-Vinylbenzyl)quinolin-2-amine (8b)

DIMP-30  
DIMP-30 11 (0.094) Cm (11:26)

1: TOF MS ES+  
7.76e6

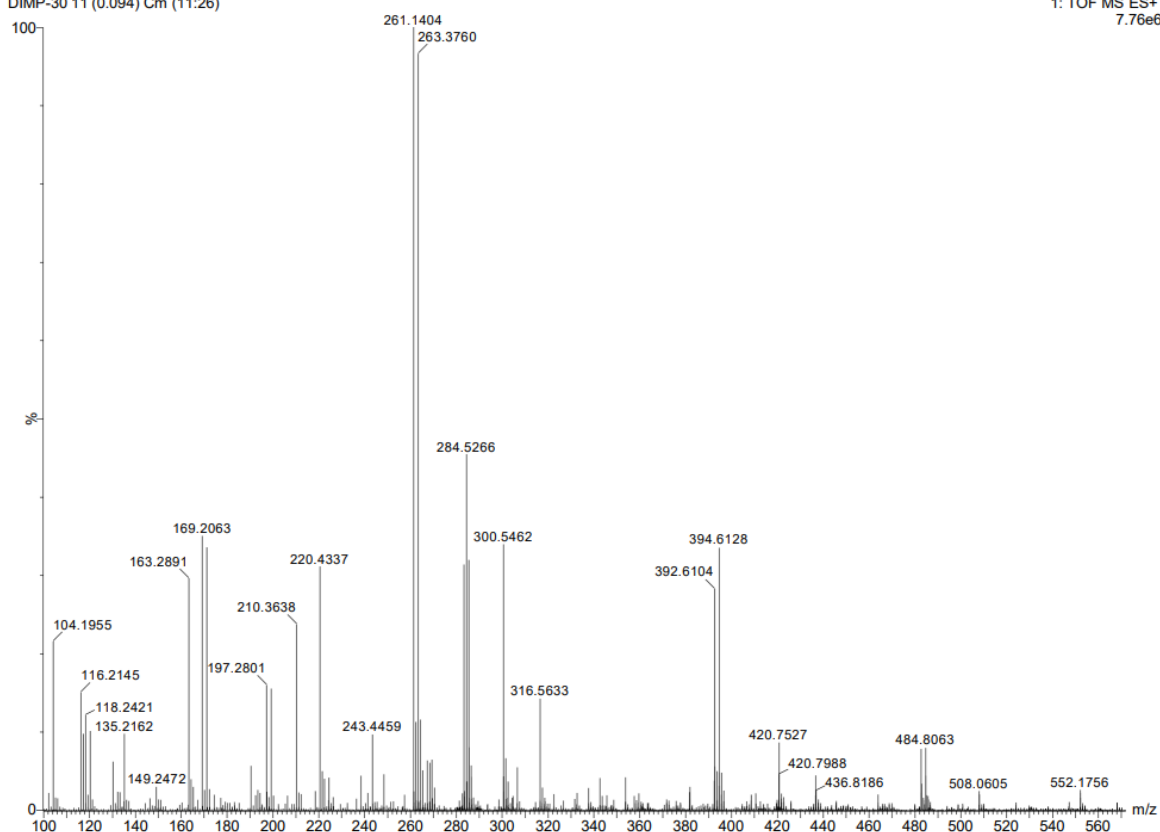

**$^1\text{H}$  NMR**  
(400 MHz,  $\text{CDCl}_3$ )

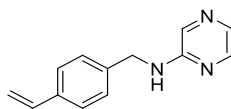

***N*-(4-Vinylbenzyl)pyrazin-2-amine (8c)**

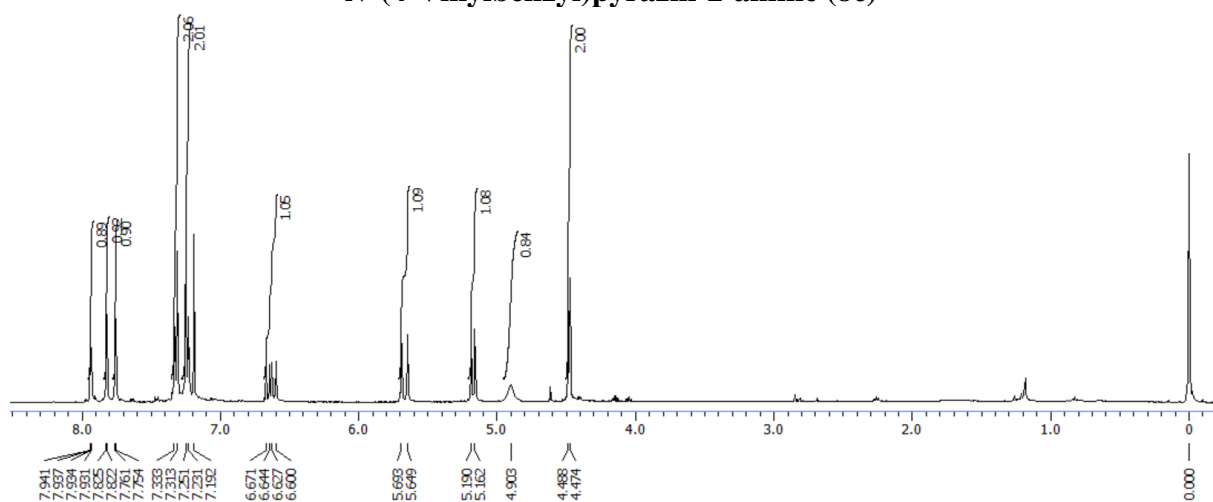

**$^{13}\text{C}$  NMR**  
(100 MHz,  $\text{CDCl}_3$ )

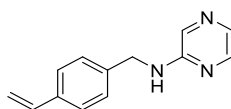

***N*-(4-Vinylbenzyl)pyrazin-2-amine (8c)**

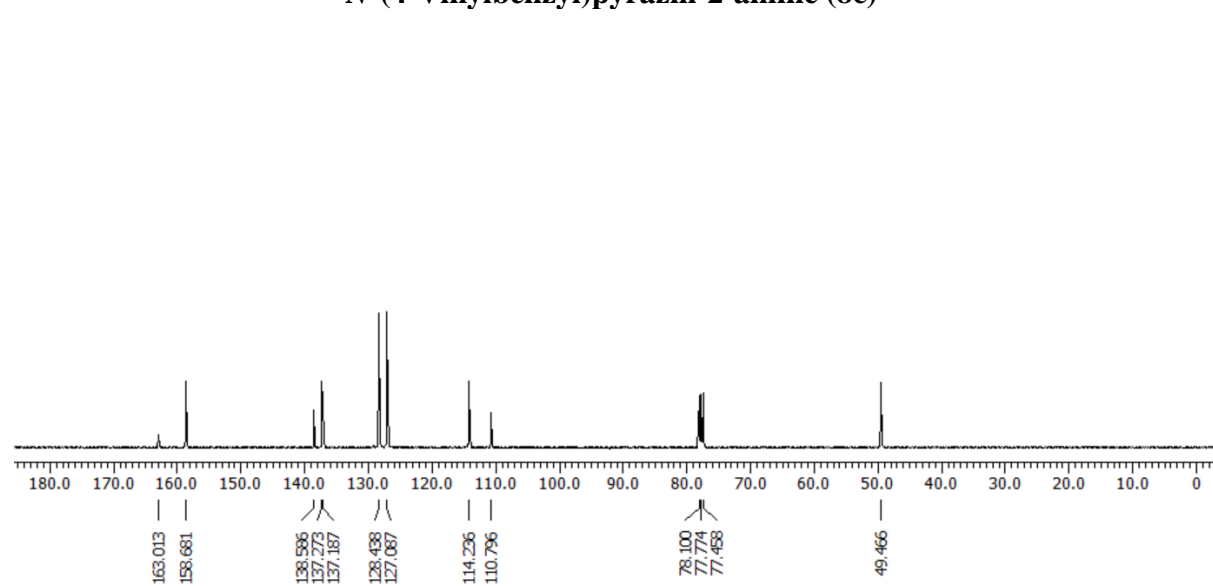



# HRMS

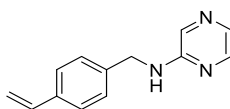

## N-(4-Vinylbenzyl)pyrazin-2-amine (8c)

### Elemental Composition Report

Page 1

#### Single Mass Analysis

Tolerance = 10.0 PPM / DBE: min = -1.5, max = 50.0

Element prediction: Off

Number of isotope peaks used for i-FIT = 3

Monoisotopic Mass, Even Electron Ions

12 formula(e) evaluated with 1 results within limits (up to 3 closest results for each mass)

Elements Used:

C: 0-22 H: 0-200 N: 0-3

DIMP-350B

QMI DIVISION, CSIR-IIIM JAMMU  
Xevo G2-XS QTOF YFC2015

24-Nov-2021

11:48:34

1: TOF MS ES+  
6.16e+005

241121\_10 10 (0.225) Cm (10)

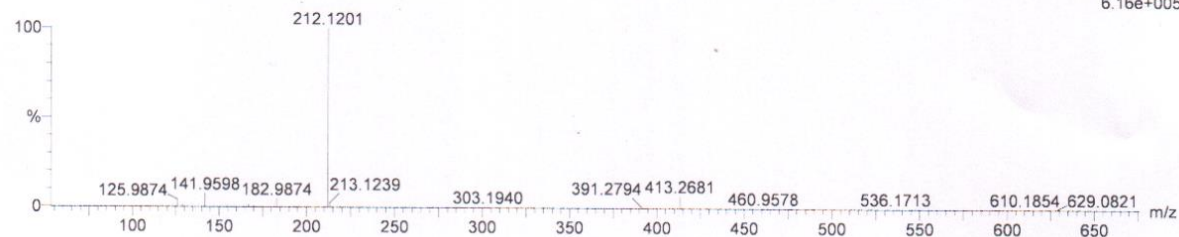

Minimum: -1.5  
Maximum: 2.0 10.0 50.0

| Mass     | Calc. Mass | mDa | PPM | DBE | i-FIT | Norm | Conf(%) | Formula    |
|----------|------------|-----|-----|-----|-------|------|---------|------------|
| 212.1201 | 212.1188   | 1.3 | 6.1 | 8.5 | 37.3  | n/a  | n/a     | C13 H14 N3 |

# <sup>1</sup>H NMR

(400 MHz, CDCl<sub>3</sub>)

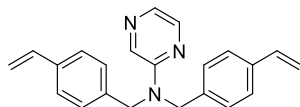

***N,N*-bis(4-Vinylbenzyl)pyrazin-2-amine (8d)**

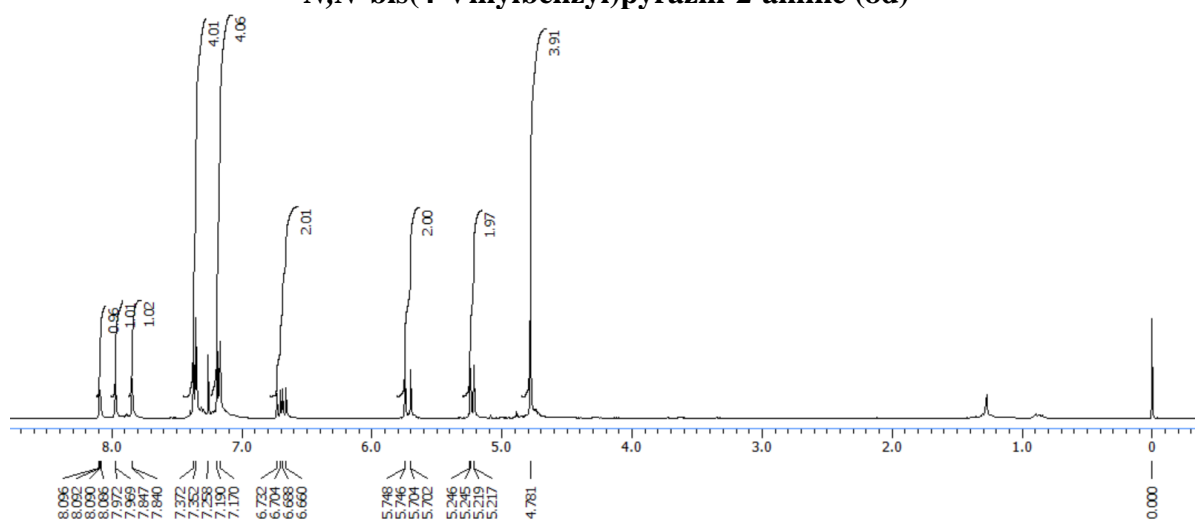

# <sup>13</sup>C NMR

(100 MHz, CDCl<sub>3</sub>)

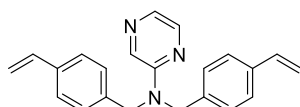

***N,N*-bis(4-Vinylbenzyl)pyrazin-2-amine (8d)**

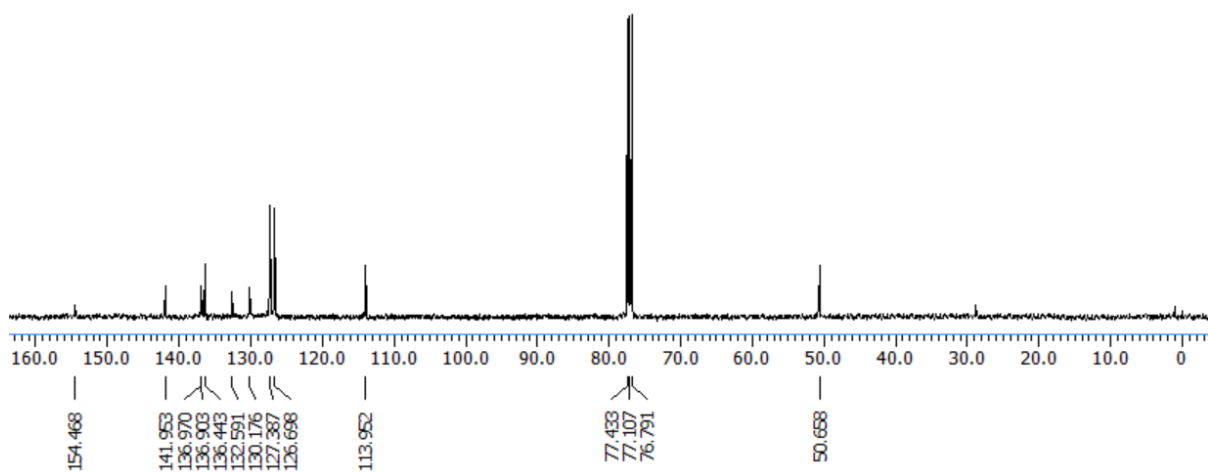

# HRMS

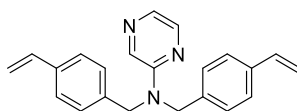

***N,N*-bis(4-Vinylbenzyl)pyrazin-2-amine (8d)**

## Elemental Composition Report

Page 1

### Single Mass Analysis

Tolerance = 10.0 PPM / DBE: min = -1.5, max = 50.0

Element prediction: Off

Number of isotope peaks used for i-FIT = 3

Monoisotopic Mass, Even Electron Ions

7 formula(e) evaluated with 1 results within limits (up to 3 closest results for each mass)

Elements Used:

C: 0-22 H: 0-200 N: 0-3

DIMP-350A

QMI DIVISION, CSIR-IIIM JAMMU  
Xevo G2-XS QTOF YFC2015

24-Nov-2021

11:40:52

1: TOF MS ES+

1.29e+006

241121\_07 11 (0.242) Cm (11)

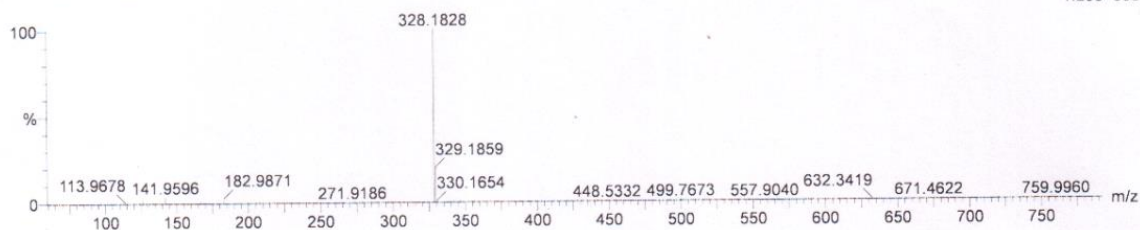

Minimum: -1.5  
Maximum: 2.0 10.0 50.0

| Mass     | Calc. Mass | mDa | PPM | DBE  | i-FIT | Norm | Conf(%) | Formula    |
|----------|------------|-----|-----|------|-------|------|---------|------------|
| 328.1828 | 328.1814   | 1.4 | 4.3 | 13.5 | 44.8  | n/a  | n/a     | C22 H22 N3 |

**$^1\text{H}$  NMR**  
**(400 MHz,  $(\text{CD}_3)_2\text{SO}$ )**

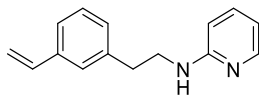

***N*-(3-Vinylphenethyl)pyridin-2-amine (12)**

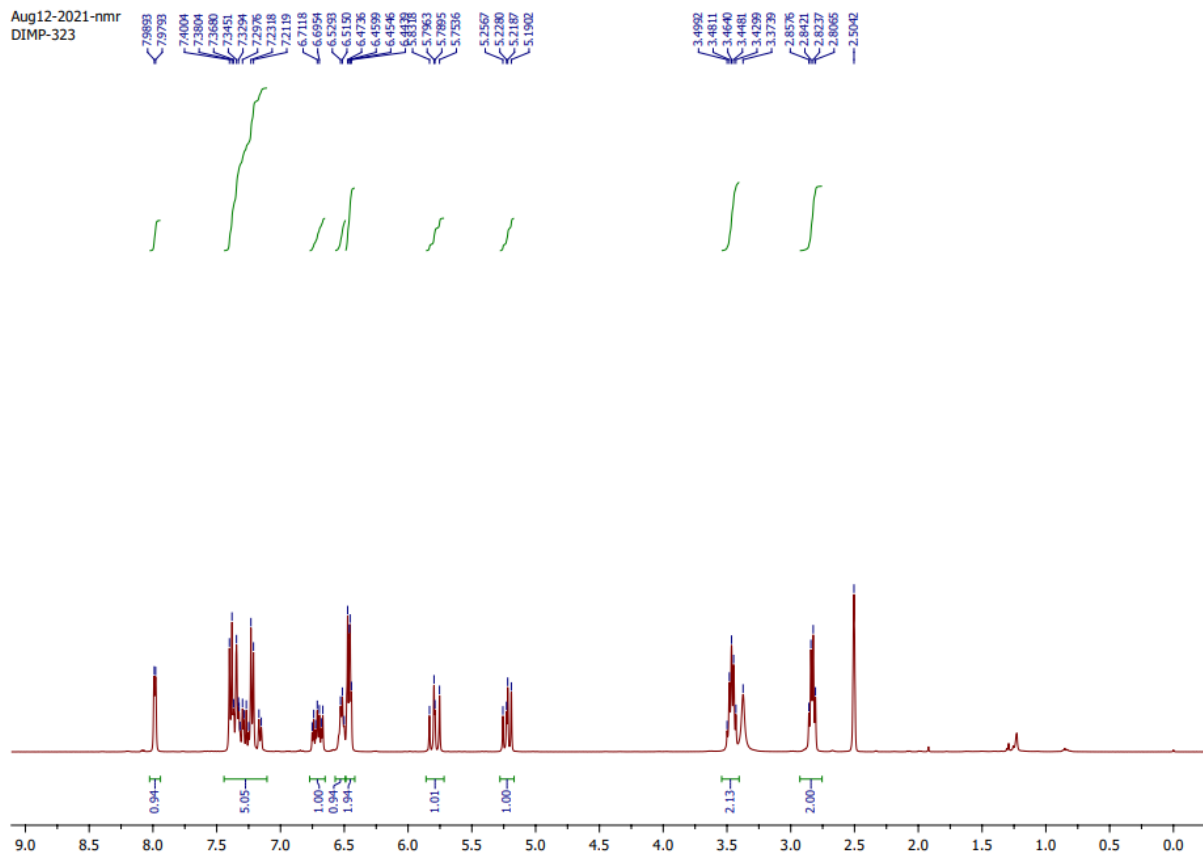

**$^{13}\text{C}$  NMR**

**(100 MHz,  $(\text{CD}_3)_2\text{SO}$ )**

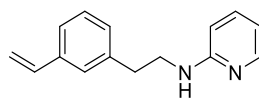

***N*-(3-Vinylphenethyl)pyridin-2-amine (12)**

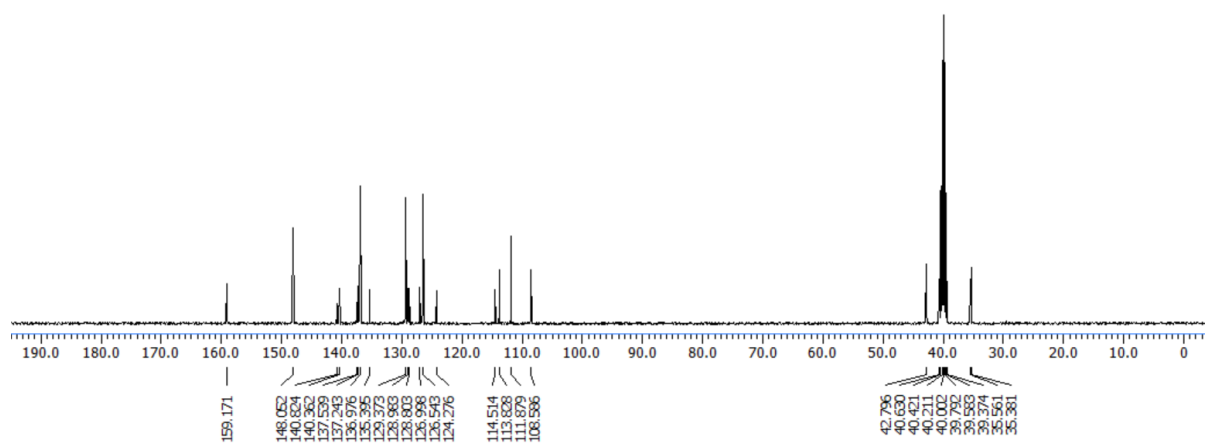

# HRMS

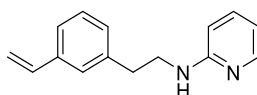

**N-(3-Vinylphenethyl)pyridin-2-amine) (12)**

## Elemental Composition Report

Page 1

### Single Mass Analysis

Tolerance = 10.0 PPM / DBE: min = -1.5, max = 50.0

Element prediction: Off

Number of isotope peaks used for i-FIT = 3

Monoisotopic Mass, Even Electron Ions

4 formula(e) evaluated with 1 results within limits (up to 3 closest results for each mass)

Elements Used:

C: 0-15 H: 0-200 N: 0-2

DIMP-323

QMI DIVISION, CSIR-IIIM JAMMU  
Xevo G2-XS QTOF YFC2015

25-Nov-2021

11:46:53

1: TOF MS ES+

4.55e+005

251121\_08 49 (0.984) Cm (49)

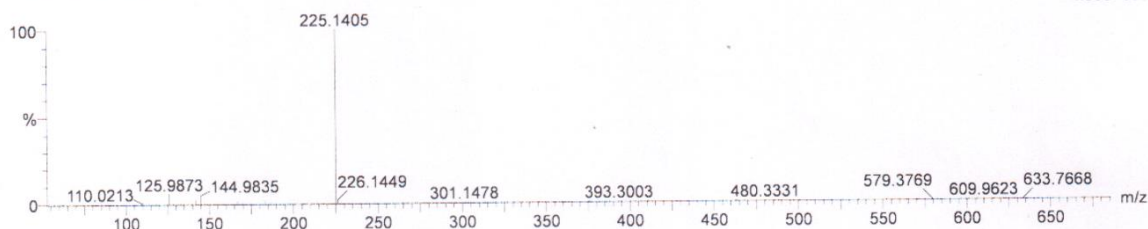

Minimum: -1.5  
Maximum: 2.0 10.0 50.0

| Mass     | Calc. Mass | mDa | PPM | DBE | i-FIT | Norm | Conf(%) | Formula    |
|----------|------------|-----|-----|-----|-------|------|---------|------------|
| 225.1405 | 225.1392   | 1.3 | 5.8 | 8.5 | 37.1  | n/a  | n/a     | C15 H17 N2 |

# <sup>1</sup>H NMR

(400 MHz, CDCl<sub>3</sub>)

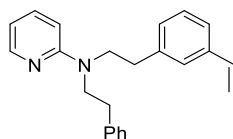

*N*-Phenethyl-*N*-(3-vinylphenethyl)pyridin-2-amine (12')

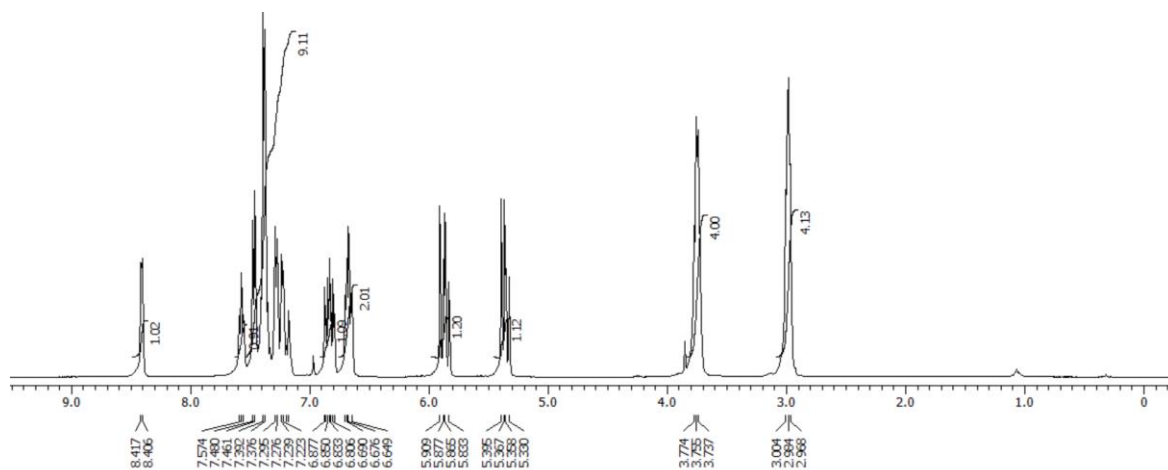

# <sup>13</sup>C NMR

(100 MHz, CDCl<sub>3</sub>)

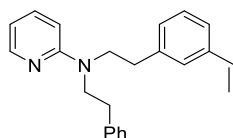

*N*-Phenethyl-*N*-(3-vinylphenethyl)pyridin-2-amine (12')

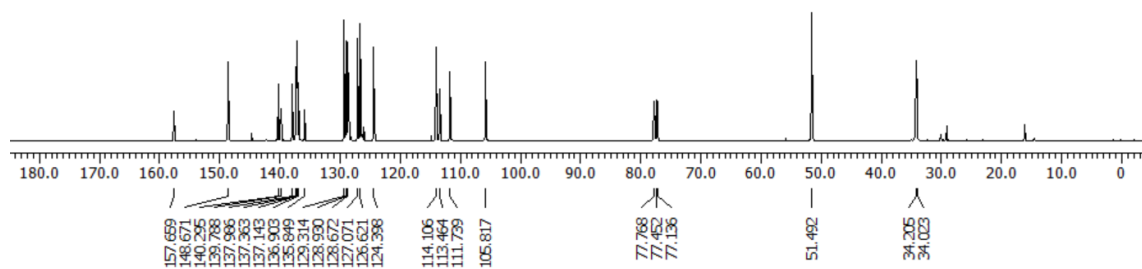

# HRMS

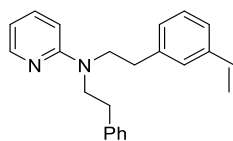

## *N*-Phenethyl-*N*-(3-vinylphenethyl)pyridin-2-amine (12')

DIMP-323  
DIMP-323 12 (0.101) Cm (3:20)

1: TOF MS ES+  
5.57e5

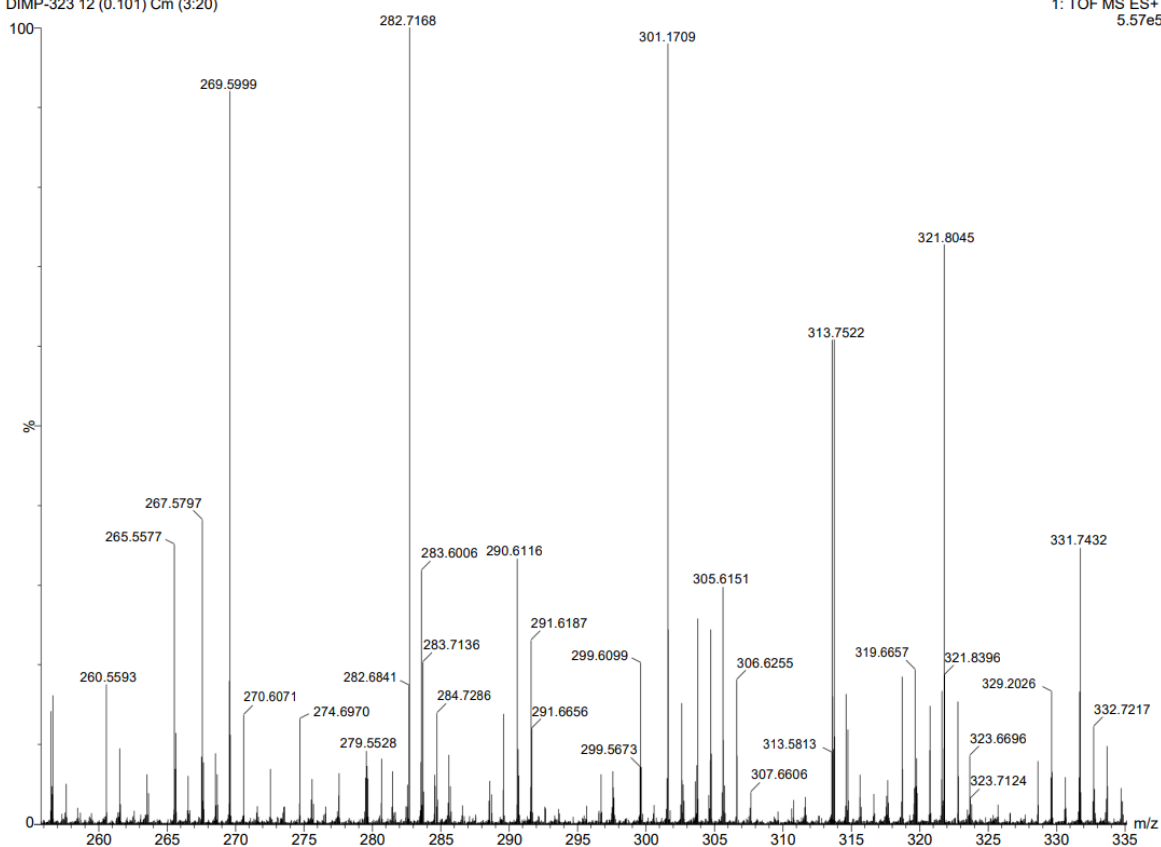



# <sup>1</sup>H NMR

(400 MHz, (CD<sub>3</sub>)<sub>2</sub>SO)

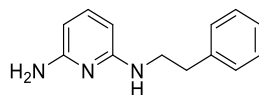

**N<sup>2</sup>-Phenethylpyridin-2,6-diamine (14)**

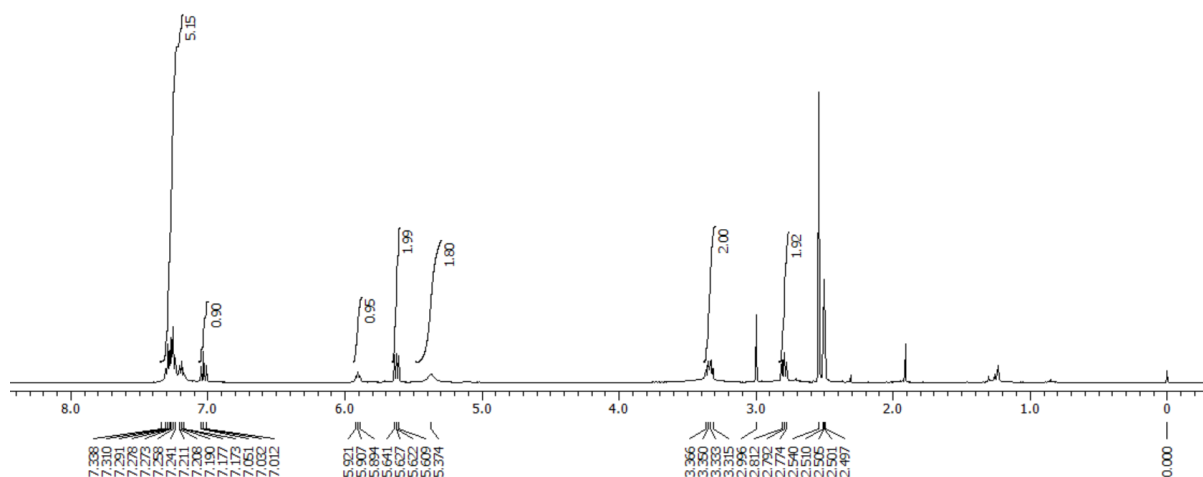

# <sup>13</sup>C NMR

(100 MHz, (CD<sub>3</sub>)<sub>2</sub>SO)

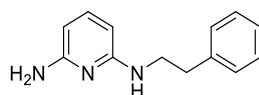

**N<sup>2</sup>-Phenethylpyridin-2,6-diamine (14)**

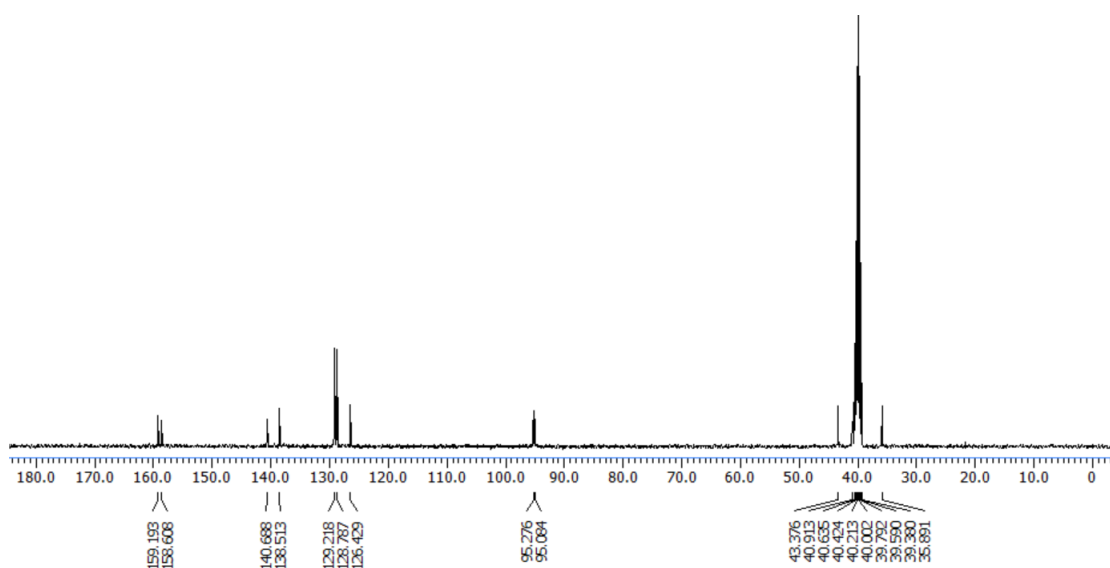

# HRMS

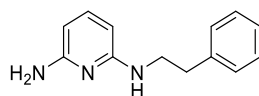

## N<sup>2</sup>-Phenethylpyridin-2,6-diamine (14)

### Elemental Composition Report

Page 1

#### Single Mass Analysis

Tolerance = 10.0 PPM / DBE: min = -1.5, max = 50.0

Element prediction: Off

Number of isotope peaks used for i-FIT = 3

Monoisotopic Mass, Even Electron Ions

12 formula(e) evaluated with 1 results within limits (up to 3 closest results for each mass)

Elements Used:

C: 0-22 H: 0-200 N: 0-3

DIMP-317

QMI DIVISION, CSIR-IIIM JAMMU  
Xevo G2-XS QTOF YFC2015

24-Nov-2021

11:43:27

1: TOF MS ES+

5.96e+005

241121\_08 7 (0.155) Cm (7:8)

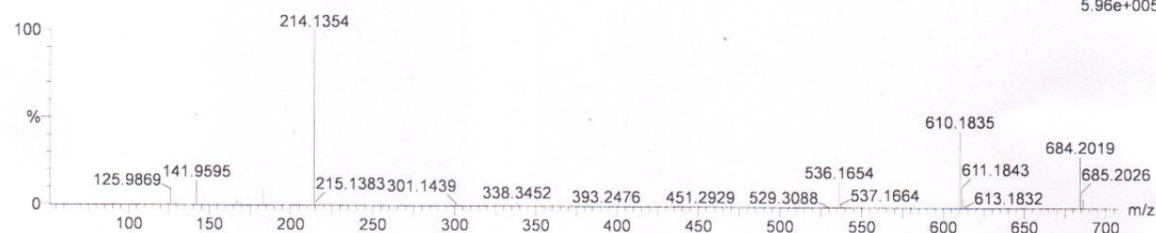

Minimum: -1.5  
Maximum: 2.0 10.0 50.0

| Mass     | Calc. Mass | mDa | PPM | DBE | i-FIT | Norm | Conf(%) | Formula    |
|----------|------------|-----|-----|-----|-------|------|---------|------------|
| 214.1354 | 214.1344   | 1.0 | 4.7 | 7.5 | 40.4  | n/a  | n/a     | C13 H16 N3 |

**$^1\text{H}$  NMR**  
**(400 MHz, (CDCl<sub>3</sub>))**

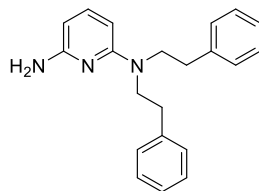

***N,N'*-Diphenethylpyridine-2,6-diamine (14')**

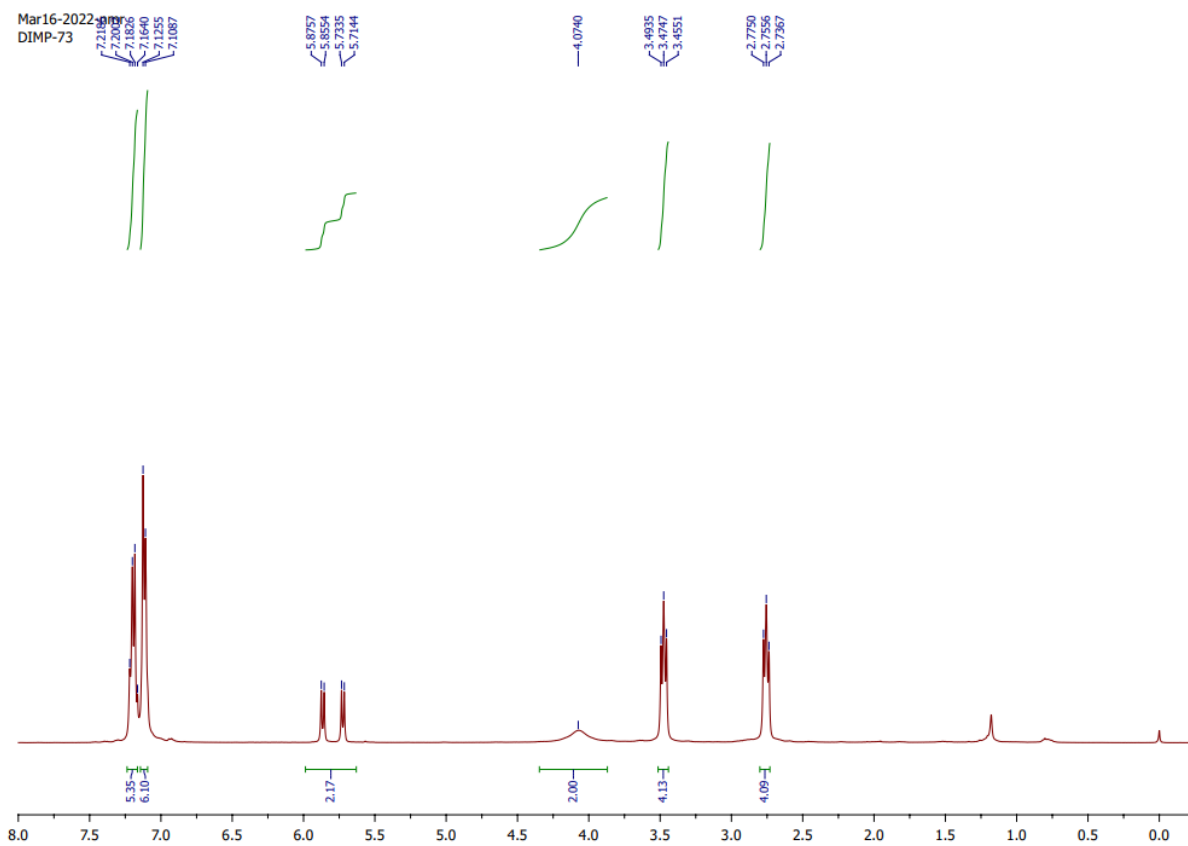

**$^{13}\text{C}$  NMR**  
**(100 MHz, (CDCl<sub>3</sub>))**



***N*<sup>2</sup>,*N*<sup>2</sup>-Diphenethylpyridine-2,6-diamine (14')**

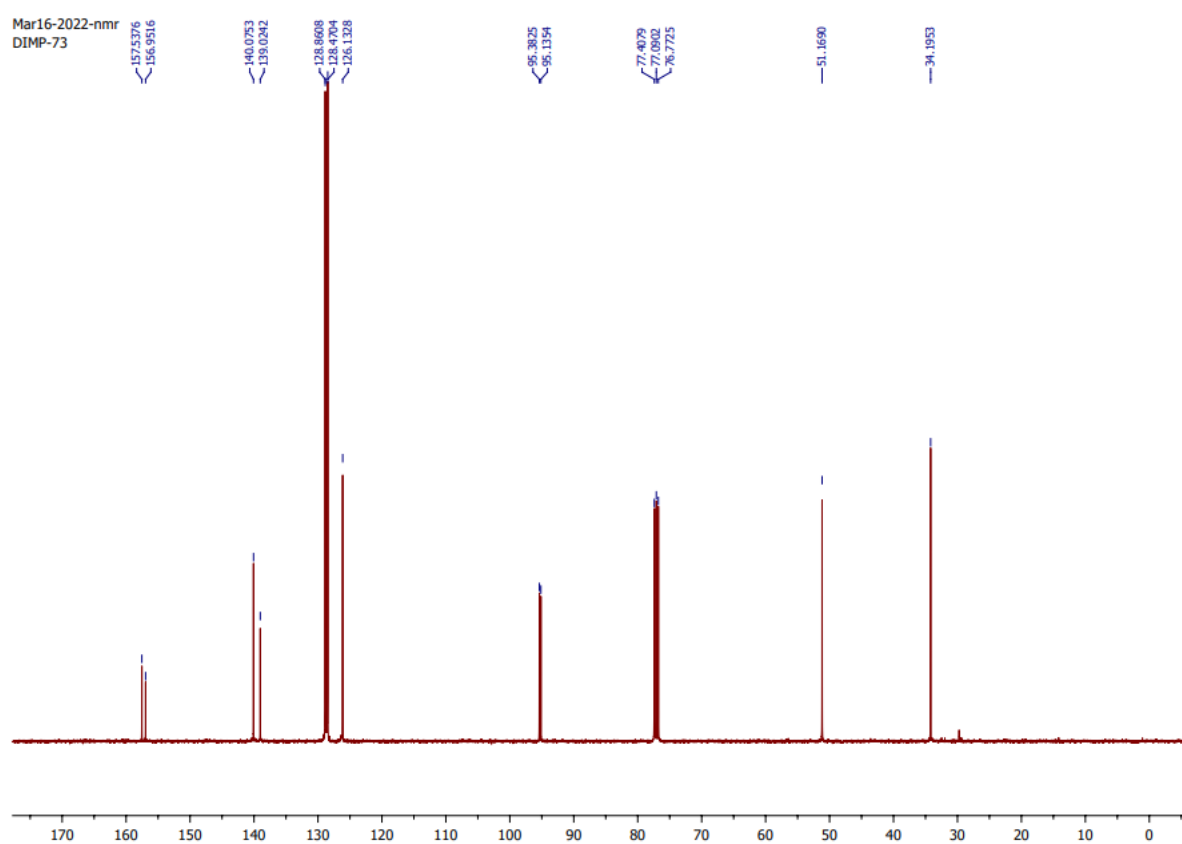

## HRMS

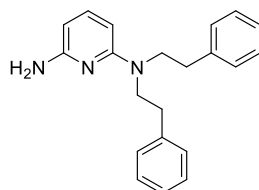

***N*<sup>2</sup>,*N*<sup>2</sup>-Diphenethylpyridine-2,6-diamine (14')**

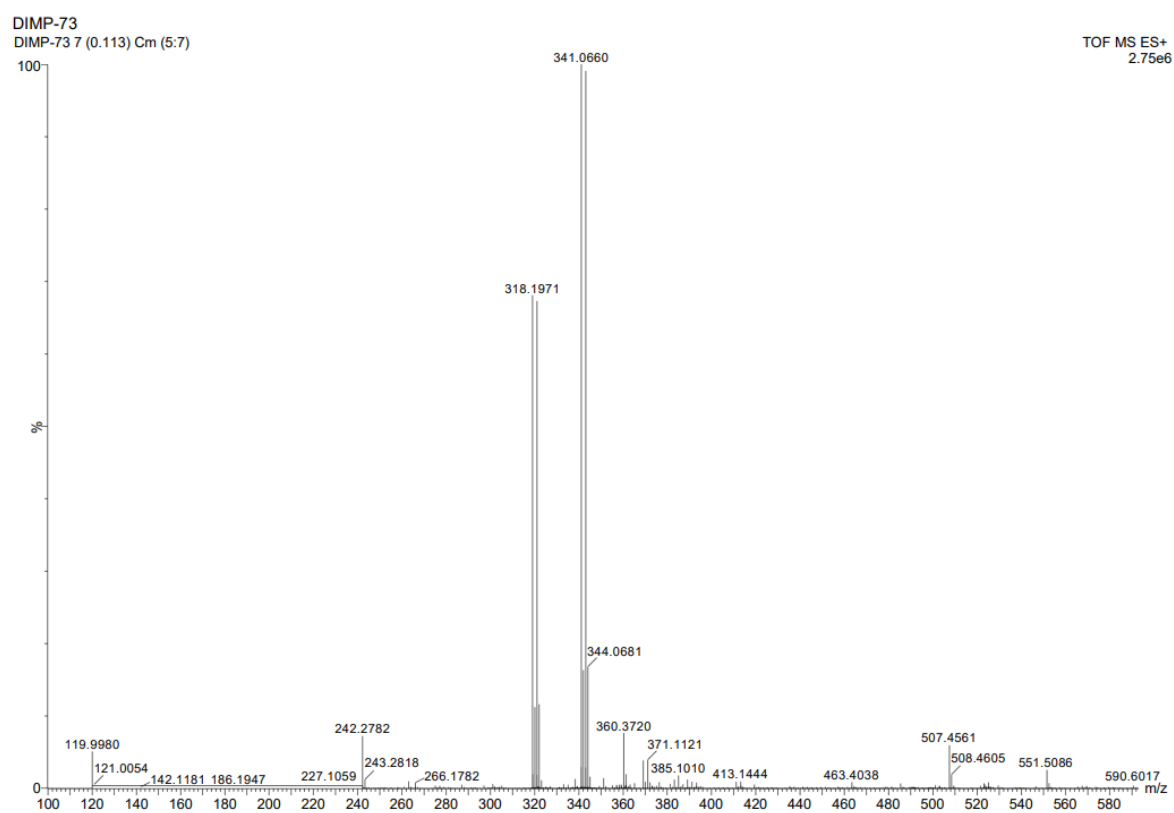

**<sup>1</sup>H NMR**

**(400 MHz, CDCl<sub>3</sub>)**

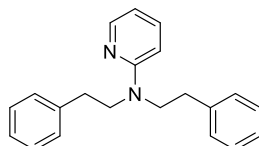

***N,N*-(diphenethylpyridin-2-amine) (15a)**

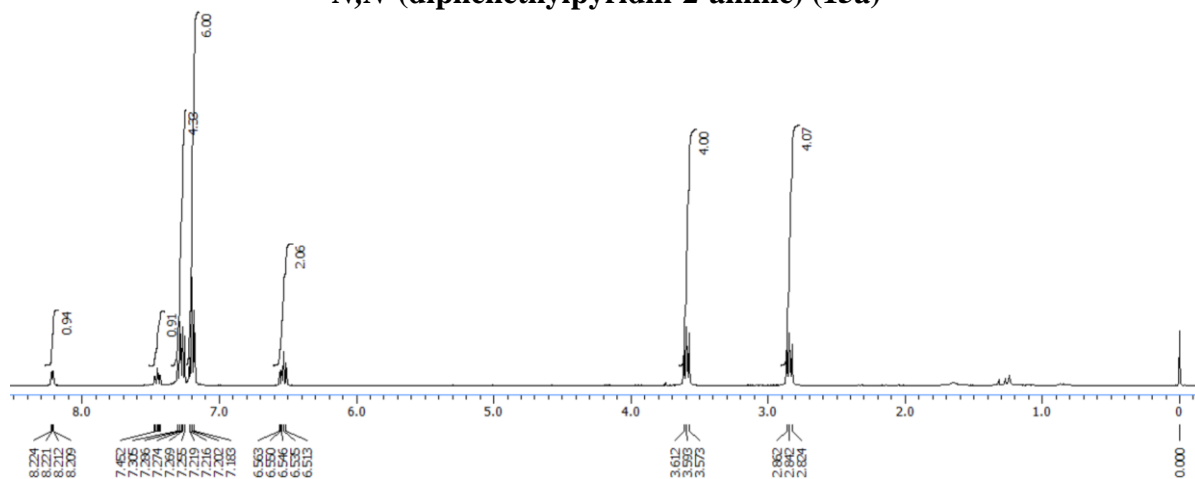

**<sup>13</sup>C NMR**

**(100 MHz, CDCl<sub>3</sub>)**

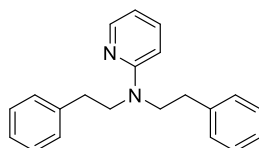

***N,N*-(diphenethylpyridin-2-amine) (15a)**

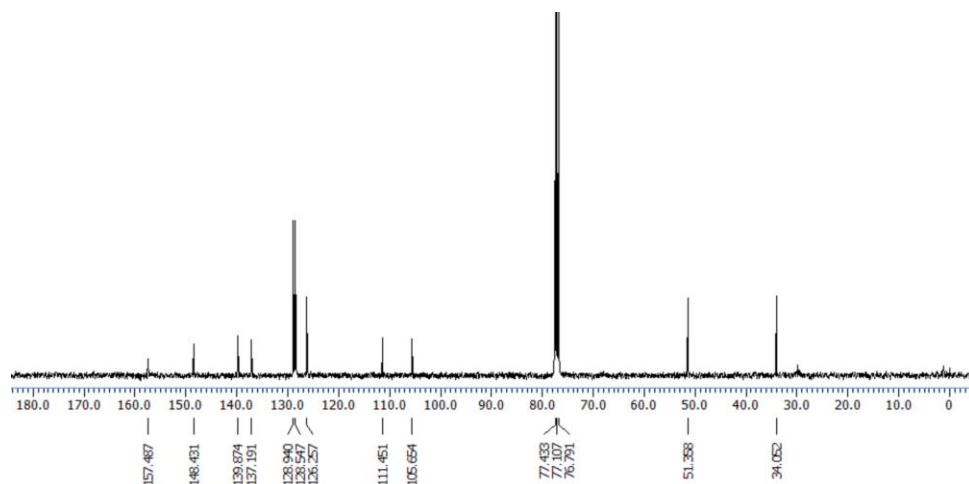

## HRMS

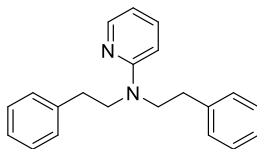

**N,N-(diphenethylpyridin-2-amine) (15a)**

### Elemental Composition Report

Page 1

#### Single Mass Analysis

Tolerance = 10.0 PPM / DBE: min = -1.5, max = 50.0

Element prediction: Off

Number of isotope peaks used for i-FIT = 3

Monoisotopic Mass, Even Electron Ions

13 formula(e) evaluated with 1 results within limits (up to 3 closest results for each mass)

Elements Used:

C: 0-22 H: 0-200 N: 0-3

DIMP-383

QMI DIVISION, CSIR-IIIM JAMMU  
Xevo G2-XS QTOF YFC2015

24-Nov-2021  
11:46:00

1: TOF MS ES+  
1.51e+006

241121\_09 39 (0.775) Cm (39.40)

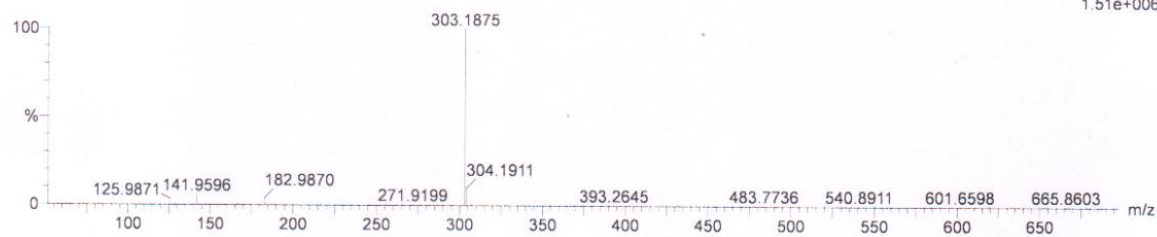

Minimum: -1.5  
Maximum: 50.0

| Mass     | Calc. Mass | mDa | PPM | DBE  | i-FIT | Norm | Conf(%) | Formula    |
|----------|------------|-----|-----|------|-------|------|---------|------------|
| 303.1875 | 303.1861   | 1.4 | 4.6 | 11.5 | 39.0  | n/a  | n/a     | C21 H23 N2 |

**<sup>1</sup>H NMR**

**(400 MHz, CDCl<sub>3</sub>)**

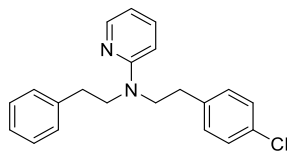

***N*-(4-Chlorophenethyl)-*N*-phenethylpyridin-2-amine (15b)**

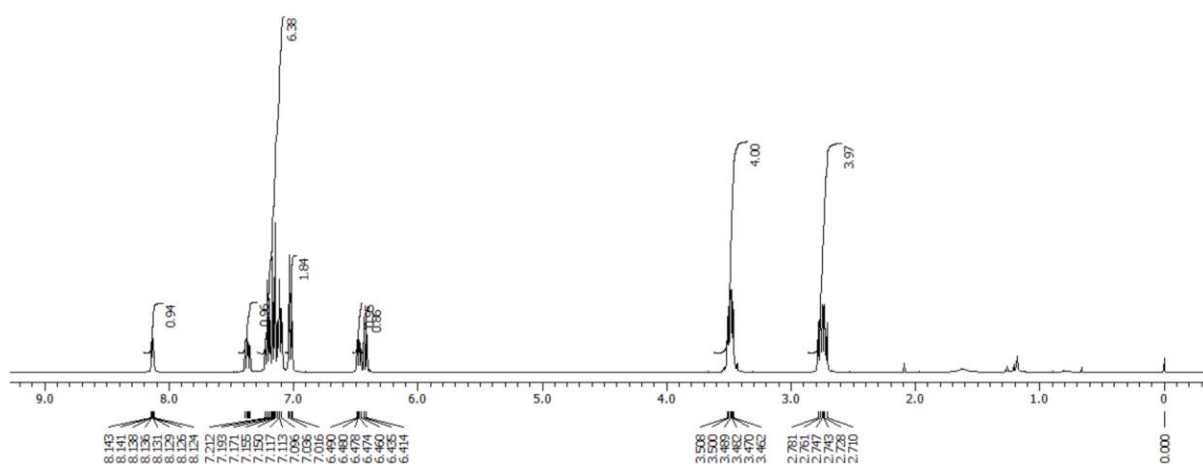

**<sup>13</sup>C NMR**

**(100 MHz, CDCl<sub>3</sub>)**

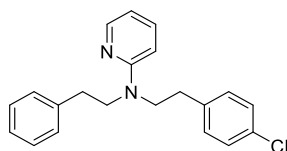

***N*-(4-Chlorophenethyl)-*N*-phenethylpyridin-2-amine (15b)**

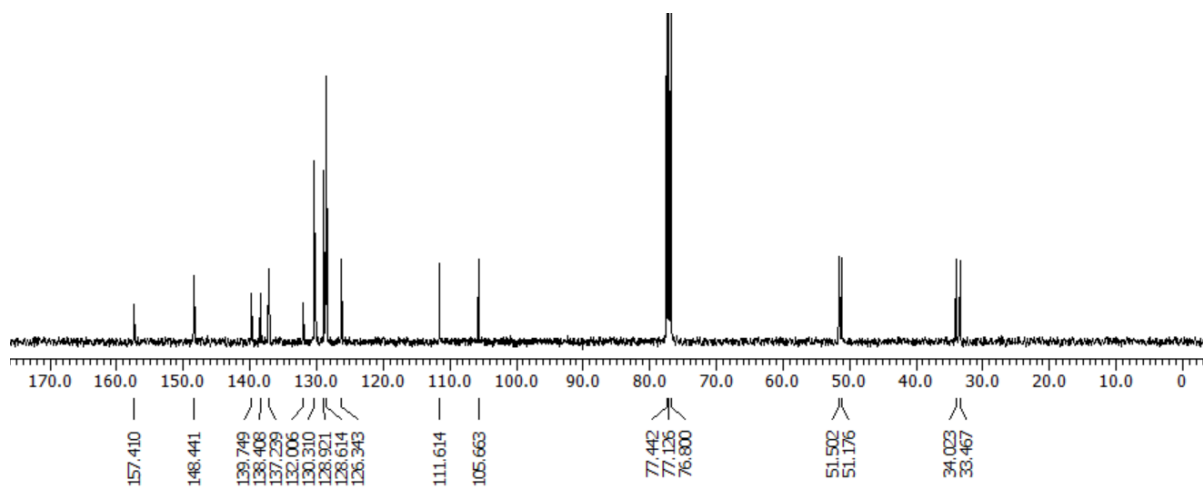



## HRMS

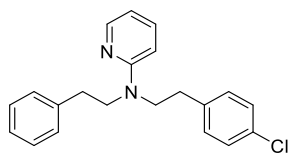

***N*-(4-Chlorophenethyl)-*N*-phenethylpyridin-2-amine (15b)**

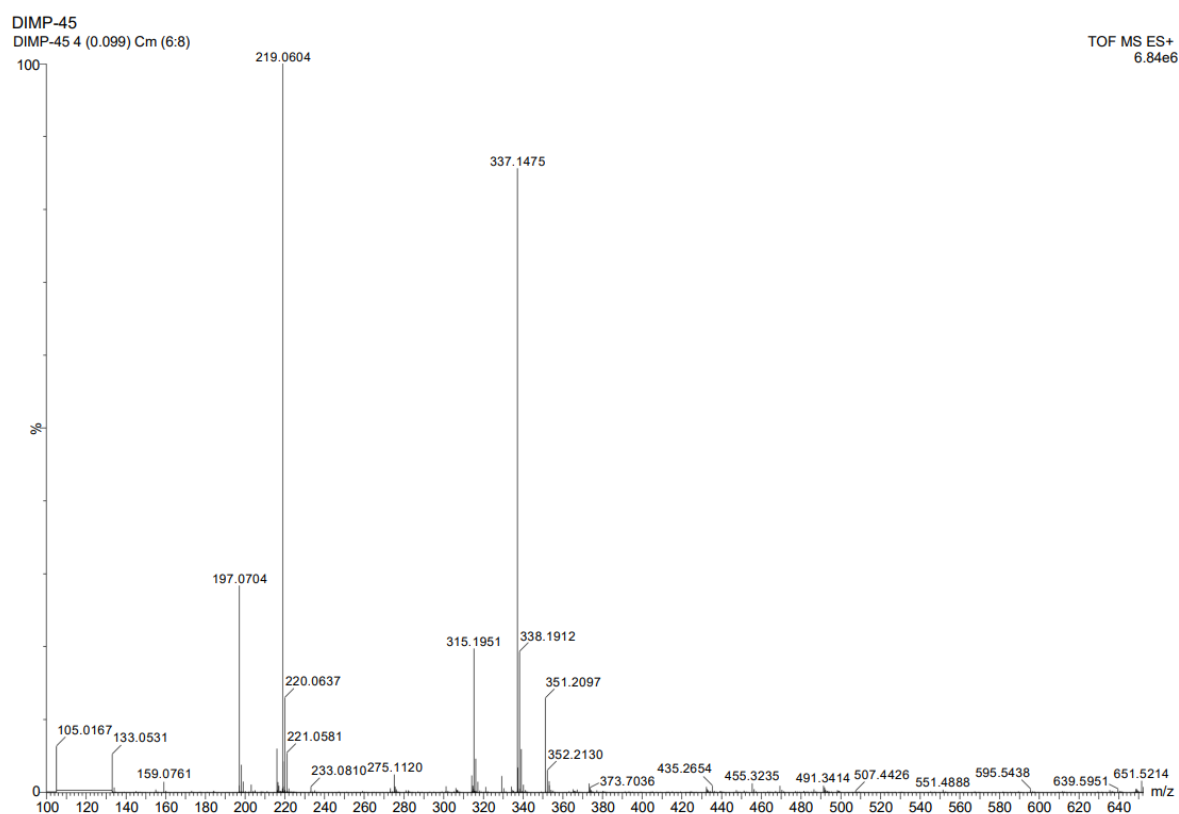

# <sup>1</sup>H NMR

(400 MHz, CDCl<sub>3</sub>)

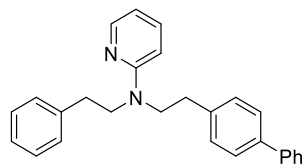

*N*-(2-([1,1'-Biphenyl]-4-yl)ethyl)-*N*-phenethylpyridin-2-amine (15c)

Apr05-2022-nmr  
DIMP-50

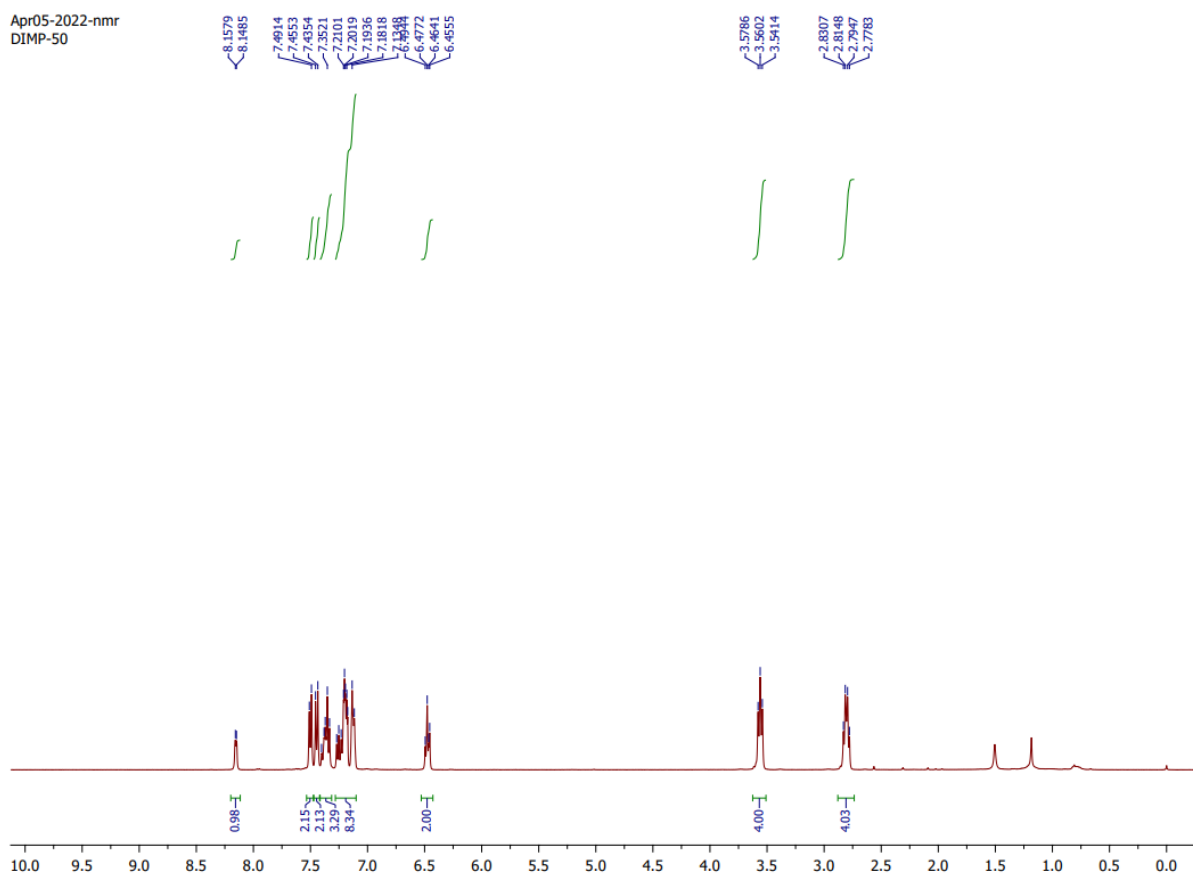

**$^{13}\text{C}$  NMR**

**(100 MHz,  $\text{CDCl}_3$ )**

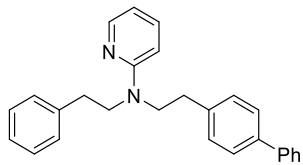

***N*-(2-([1,1'-Biphenyl]-4-yl)ethyl)-*N*-phenethylpyridin-2-amine (15c)**

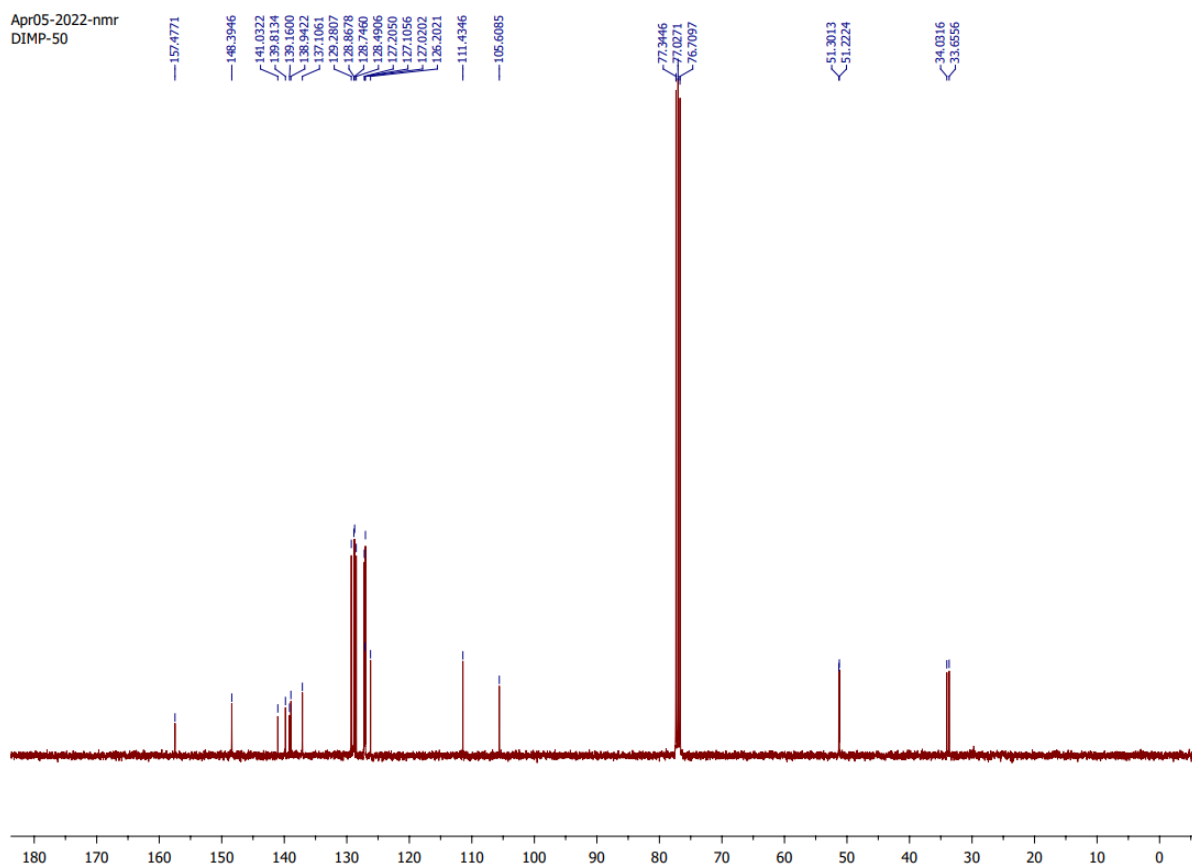

## HRMS

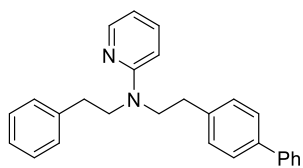

***N*-(2-([1,1'-Biphenyl]-4-yl)ethyl)-*N*-phenethylpyridin-2-amine (15c)**

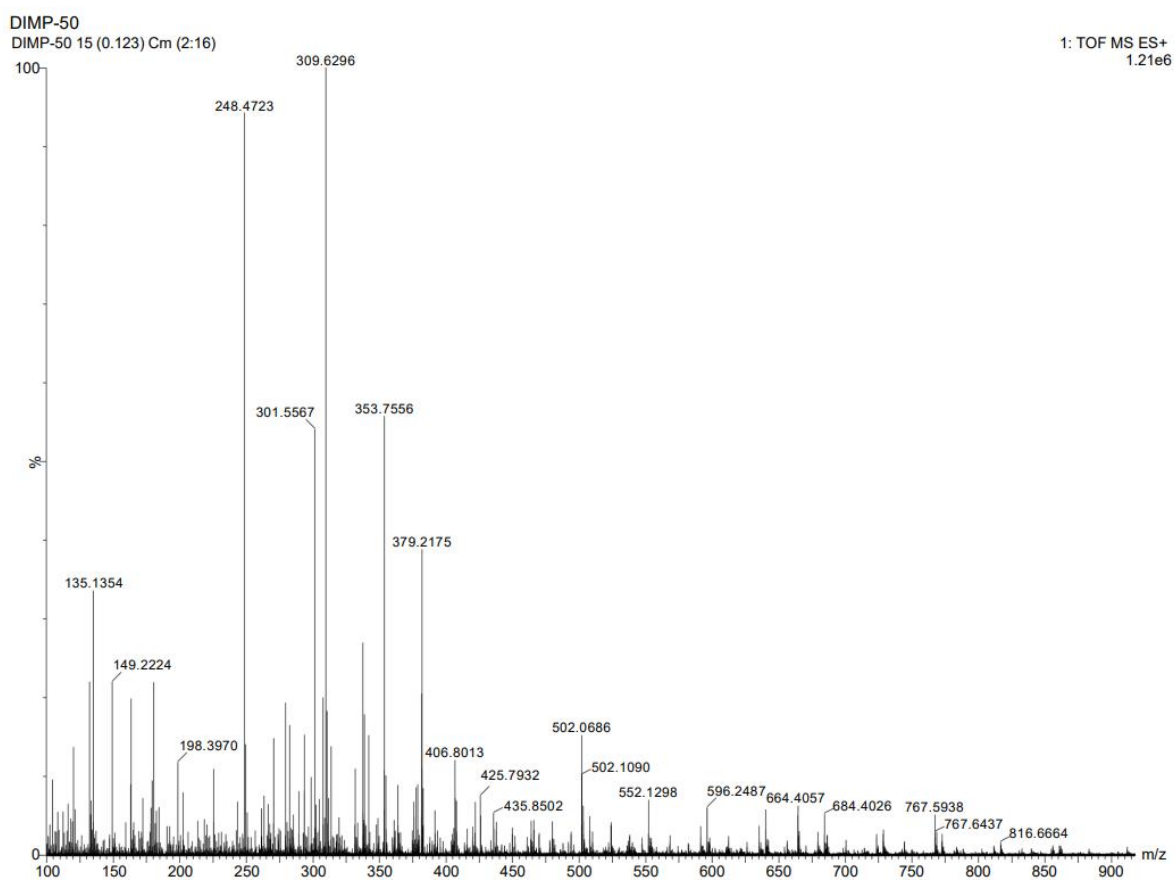

# <sup>1</sup>H NMR

(400 MHz, (CD<sub>3</sub>)<sub>2</sub>SO)

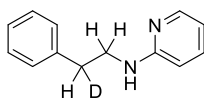

*N*-(2-Phenethyl-2-*d*)pyridin-2-amine) (3a')

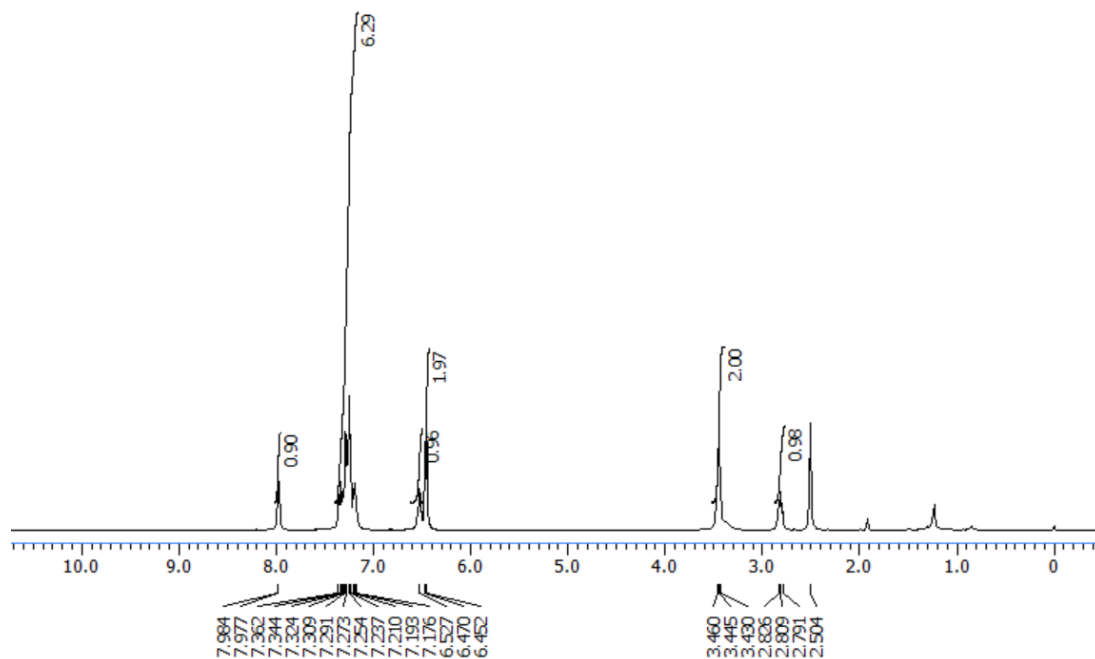

# <sup>13</sup>C NMR

(100 MHz, (CD<sub>3</sub>)<sub>2</sub>SO)

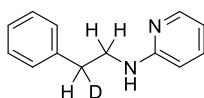

*N*-(2-Phenethyl-2-*d*)pyridin-2-amine) (3a')

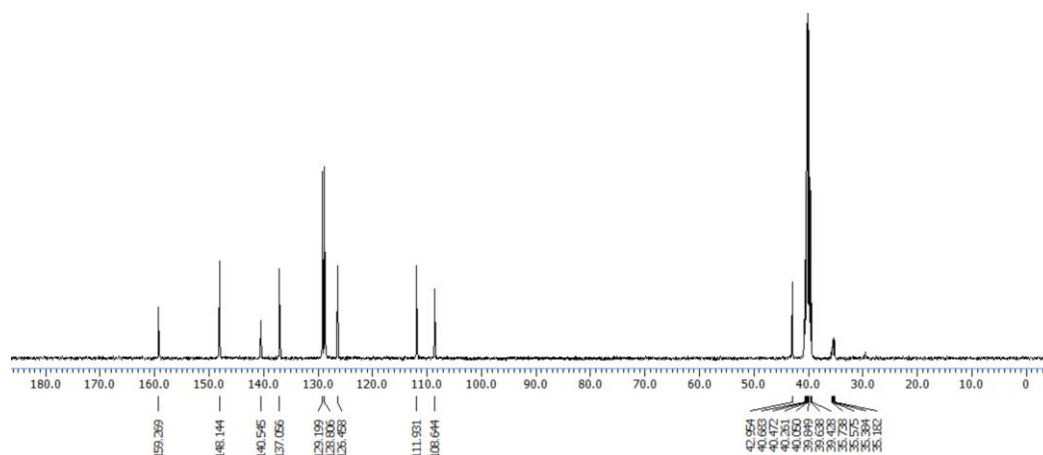

# HRMS

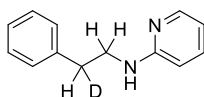

*N*-(2-Phenethyl-2-*d*)pyridin-2-amine) (3a')

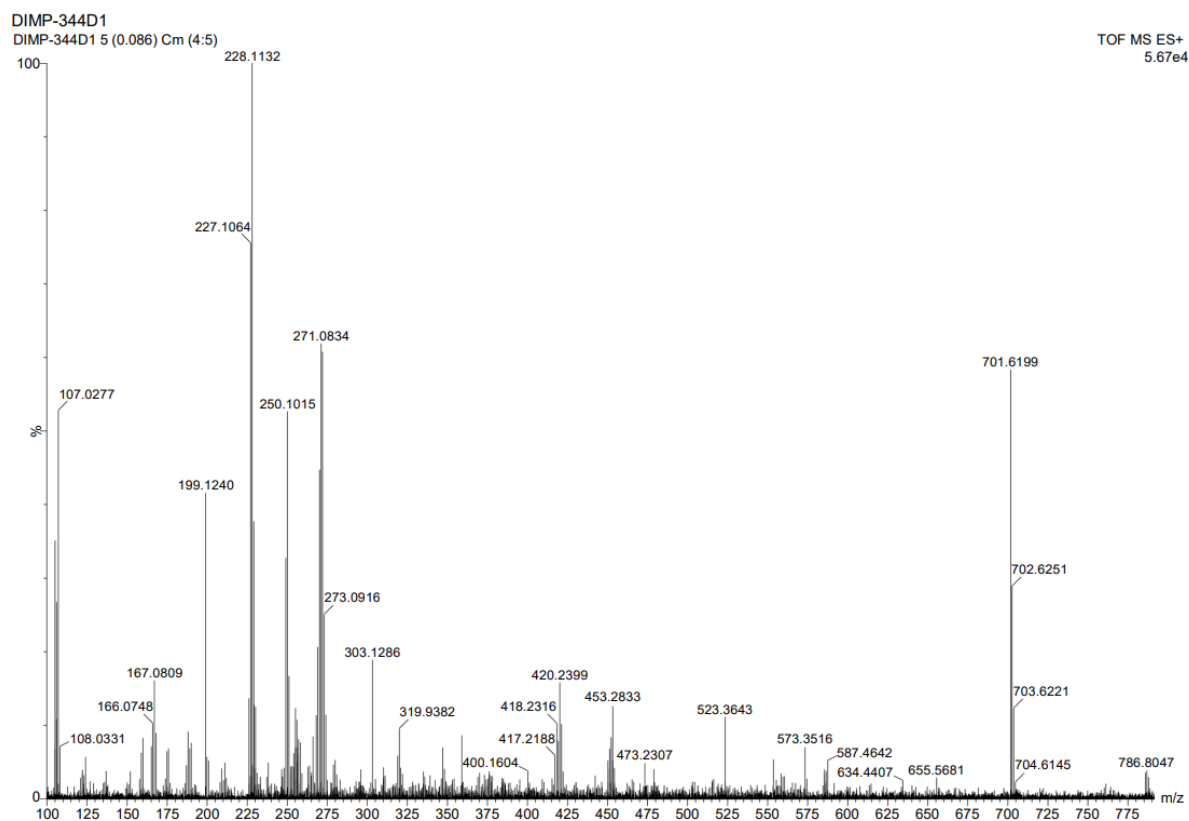

# <sup>1</sup>H NMR

(400 MHz, (CD<sub>3</sub>)<sub>2</sub>SO)

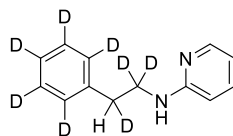

***N*-(2-(Phenyl-*d*<sub>5</sub>)ethyl-1,1,2-*d*<sub>3</sub>)pyridin-2-amine) (3a'')**

Aug10-2021-nmr  
DIMP-282-A

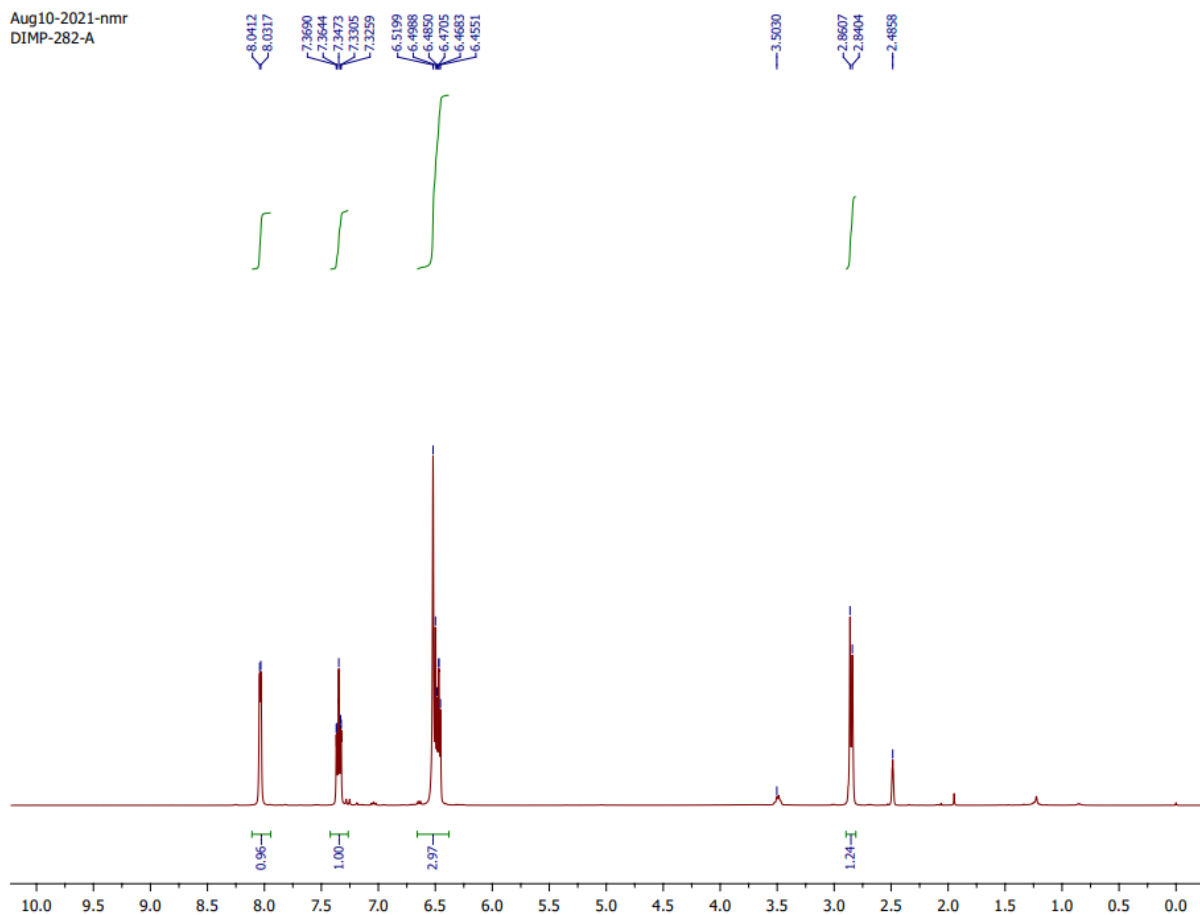

**$^{13}\text{C}$  NMR**

**(100 MHz,  $(\text{CD}_3)_2\text{SO}$ )**

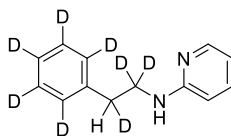

***N*-(2-(Phenyl-*d*<sub>5</sub>)ethyl-1,1,2-*d*<sub>3</sub>)pyridin-2-amine) (3a'')**

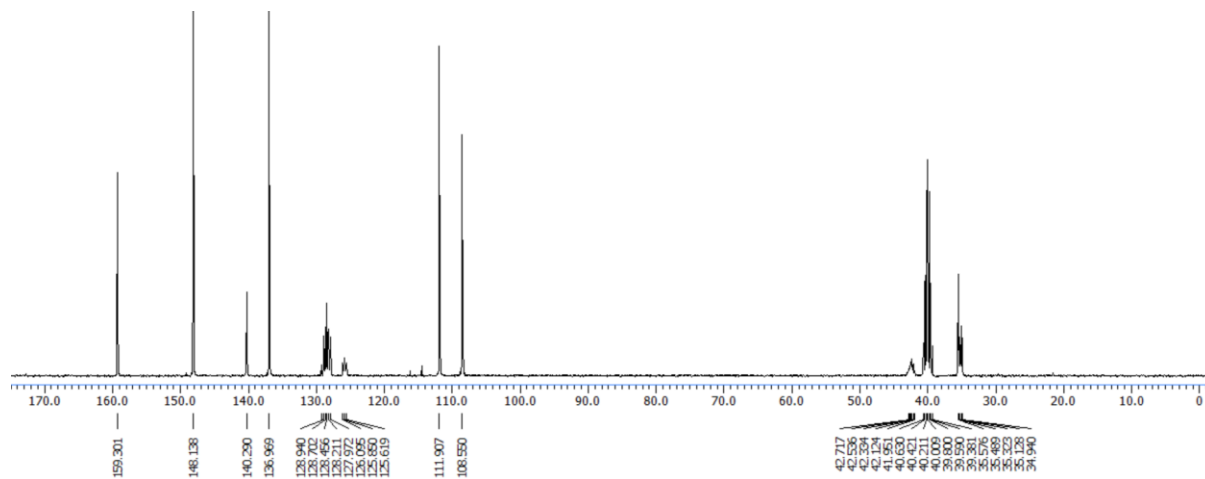



## HRMS

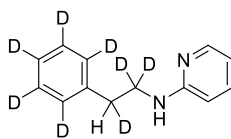

***N*-(2-(Phenyl-*d*<sub>5</sub>)ethyl-1,1,2-*d*<sub>3</sub>)pyridin-2-amine) (3a'')**

DIMP-282  
DIMP-282 6 (0.099) Cm (5:8)

TOF MS ES+  
9.89e6

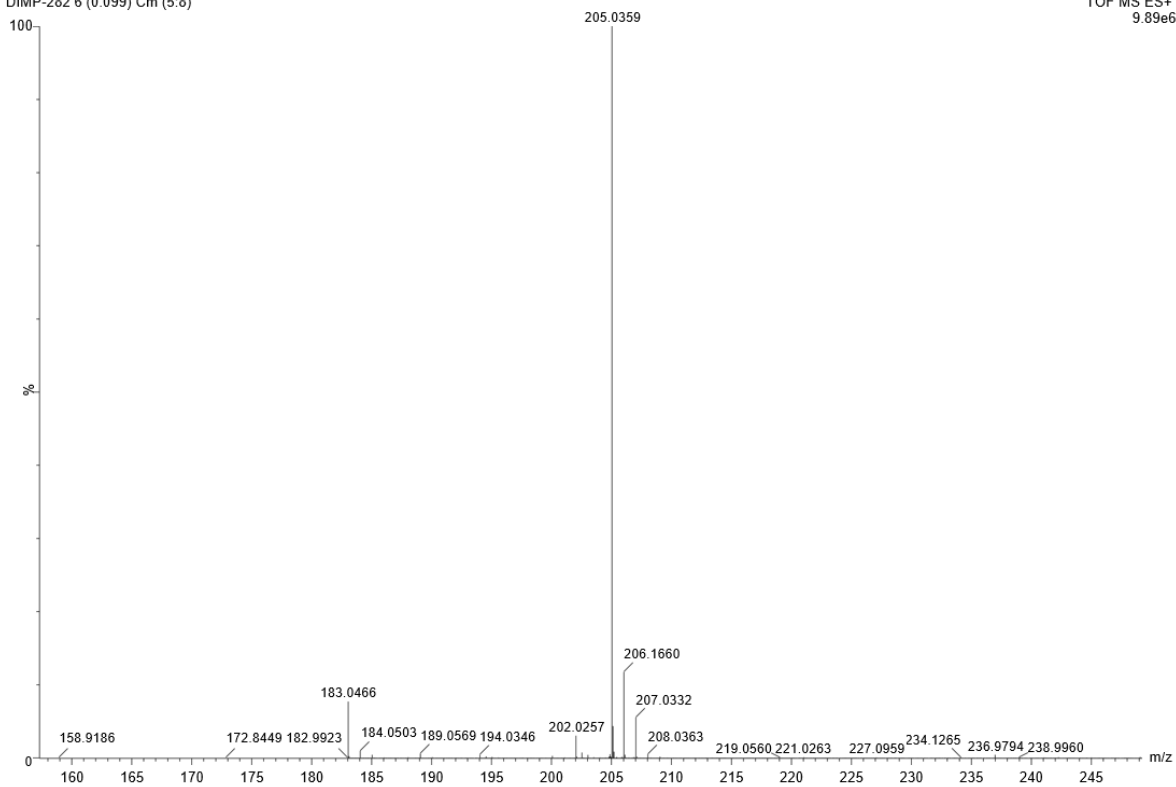

Supplement: d2cc02781j1.pdf [file d2cc02781j1.pdf]
